# Supplementary material for: Solvent effects on the intramolecular conversion of trimethylsulfonium chloride to dimethyl sulfide and methyl chloride
Source: Royal Society of Chemistry journal article supplement (doi:10.1039/c4cp03965c), 2014-01-01
Supplement: c4cp03965c1.pdf [file c4cp03965c1.pdf]

## Solvent Effects on the Intramolecular Conversion of Trimethylsulfonium Chloride to Dimethylsulfide and Methylchloride

T. Lankau, C.H. Yu  
Supplementary Material

### S.1 Evaluation of the computational method

The evaluation of a suitable computational method for the analysis of the conversion of trimethylsulfonium chloride is done in two steps. The first step focuses on the properties of dimethylsulfide  $(\text{CH}_3)_2\text{S}$  taken from the National Institute of Standard (NIST) web page for computational benchmark data [1], such as geometries, IR spectra and dipole moments. In the second step, the basis set size is systematically increased until convergence can be observed in barrier height of the nucleophilic substitution reaction at dimethyl sulfide in the vacuum

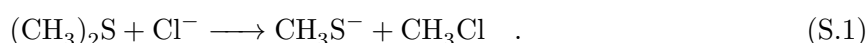

Dimethyl sulfide was chosen instead of the trimethylsulfonium cation, because a barrier can be observed in reaction S.1 while no barrier has been reported for reaction 1 (main body of the paper) in the vacuum.

Ten methods were tested in the first step: two wave function based methods (HF and MP2), two GGA (generalized gradient approximation) functionals (OLYP and OPBE), four hybrid (B3LYP, O3LYP, X3LYP, PBE1PBE) and two meta-GGA functionals (M05 and M05-2X). These methods were paired with 12 different gaussian basis sets [6-31G(d,p), 6-31+G(d,p), 6-31++G(d,p), 6-311G(d,p), 6-311+G(d,p), 6-311++G(d,p), D95+(d,p), D95++(d,p), cc-pVDZ, aug-cc-pVDZ, cc-pVTZ, aug-cc-pVTZ] including both polarization and diffuse function. The geometry of the  $(\text{CH}_3)_2\text{S}$  molecule was then optimized in the vacuum under the constraint of a  $C_s$  symmetry followed by a normal mode analysis. Methods and basis sets were used as defined in the Gaussian 09 program package [2].

The following data were extracted from the 120 combinations of basis set and method and compared with the NIST reference values given in parentheses: the carbon-sulfur bond length  $r_{\text{CS}}$  (1.802 Å), the average carbon-hydrogen bond length  $\bar{r}_{\text{CH}}$  (1.091 Å), the CSC bond angle  $\omega_{\text{CSC}}$  (98.9°), the average HCH bond angle  $\bar{\omega}_{\text{HCH}}$  (109.6°), the molecular dipole moment  $\mu$  (1.5 Debye) and three low lying vibrational modes involving the sulfur atom  $\nu_i$  (CSC scissoring vibration,  $A_1$ , 282  $\text{cm}^{-1}$ ; CS symmetrical stretch,  $A_1$ , 695  $\text{cm}^{-1}$ , CS asymmetrical stretch,  $B_2$ , 743  $\text{cm}^{-1}$ ). The large amount of data was compressed with the aid of a scoring function

$$\sigma_{\text{tot}} = \sqrt{\sum_{i=1}^2 \left( \frac{\Delta r_i}{r_i^{\text{ref}}} \right)^2 + \sum_{i=1}^2 \left( \frac{\Delta \omega_i}{\omega_i^{\text{ref}}} \right)^2 + \left( \frac{\Delta \mu}{\mu^{\text{ref}}} \right)^2 + \sum_{i=1}^3 \left( \frac{\Delta \nu_i}{\nu_i^{\text{ref}}} \right)^2} \quad (\text{S.2})$$

where  $\Delta x_i = x_i^{\text{calc}} - x_i^{\text{ref}}$  is the difference between the calculated and the NIST reference value. Table S.1 summarizes the final results for  $\sigma_{\text{tot}}$  while the complete data set is presented within the supplementary material.

|               | HF     | MP2    | OLYP   | OPBE   | B3LYP  | O3LYP  | X3LYP  | PBE1PBE | M05    | M05-2X |
|---------------|--------|--------|--------|--------|--------|--------|--------|---------|--------|--------|
| 6-31G(d,p)    | 0.2417 | 0.2117 | 0.1580 | 0.1766 | 0.1685 | 0.1618 | 0.1679 | 0.1935  | 0.1632 | 0.2252 |
| 6-31+G(d,p)   | 0.2738 | 0.2409 | 0.1729 | 0.1838 | 0.1837 | 0.1777 | 0.1840 | 0.2026  | 0.1777 | 0.2448 |
| 6-31++G(d,p)  | 0.2730 | 0.2398 | 0.1613 | 0.1740 | 0.1776 | 0.1682 | 0.1773 | 0.1973  | 0.1696 | 0.2408 |
| 6-311G(d,p)   | 0.2574 | 0.2244 | 0.1703 | 0.1797 | 0.1656 | 0.1695 | 0.1655 | 0.1830  | 0.1396 | 0.2161 |
| 6-311+G(d,p)  | 0.2480 | 0.2130 | 0.1544 | 0.1642 | 0.1514 | 0.1536 | 0.1505 | 0.1693  | 0.1243 | 0.2016 |
| 6-311++G(d,p) | 0.2515 | 0.2165 | 0.1541 | 0.1645 | 0.1554 | 0.1547 | 0.1542 | 0.1729  | 0.1262 | 0.2073 |
| D95+(d,p)     | 0.3120 | 0.2804 | 0.1702 | 0.1993 | 0.2037 | 0.1854 | 0.2032 | 0.2310  | 0.2333 | 0.2540 |
| D95++(d,p)    | 0.3087 | 0.2772 | 0.1680 | 0.1961 | 0.2013 | 0.1829 | 0.2008 | 0.2281  | 0.2310 | 0.2504 |
| cc-pVDZ       | 0.1512 | 0.1297 | 0.0894 | 0.0721 | 0.0944 | 0.0651 | 0.0912 | 0.0933  | 0.0513 | 0.1180 |
| aug-cc-pVDZ   | 0.2290 | 0.2132 | 0.1024 | 0.1063 | 0.1343 | 0.1017 | 0.1317 | 0.1437  | 0.1013 | 0.1886 |
| cc-pVTZ       | 0.1862 | 0.1657 | 0.0844 | 0.0911 | 0.0963 | 0.0724 | 0.0919 | 0.1143  | 0.0594 | 0.1409 |
| aug-cc-pVTZ   | 0.2132 | 0.1914 | 0.0955 | 0.1012 | 0.1130 | 0.0917 | 0.1101 | 0.1279  | 0.0729 | 0.1567 |

Table S.1: Results from the scoring function  $\sigma_{\text{tot}}$  (Equation S.2) for the reproduction of the experimental properties of  $(\text{CH}_3)_2\text{S}$  at various computational levels.

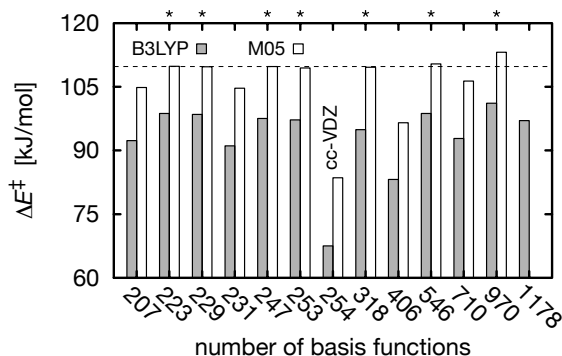

Figure S.1: Barrier height for reaction S.1 relative to the reactants. The basis sets are labeled by the number of basis functions and those including diffuse functions are marked with an asterisk at the top border of the histogram. The dashed line marks the approximate barrier height of 109.81 kJ/mol for the M05 functional.

The data in Table S.1 show that the best results with any method are consistently obtained using either the cc-VDZ or cc-VTZ basis set. However, the overall performance of these basis sets diminishes markedly as diffuse functions are added to these basis sets. A comparison of the methods along these lines show, that the inclusion of correlation effects (MP2) increases quality of the HF results, but all DFT methods perform better than the MP2 calculations. Moreover, the GGA functionals outperform the significantly more expensive hybrid functionals. This results agrees with data published by Swart *et al.* showing that the GGA functionals OLYP and OPBE are suitable functionals for the analysis of nucleophilic substitution reactions [3]. Truhlar’s meta-GGA functional M05 [4] consistently yields the best  $\sigma$ -values, but the quality of the predicted properties decreases as the HF exchange contribution increases going from M05 to M05-2X. In summary, the M05 functional using either the cc-pVDZ or cc-pVTZ basis set performs best for the analysis of dimethyl sulfide.

The winning M05 functional and 13 basis sets [6-311G(d,p) {207}, 6-311G(2d,p) {231}, 6-311+G(d,p) {223}, 6-311+G(2d,p) {247}, 6-311++G(d,p) {229}, 6-311++G(2d,p) {253}, cc-pVDZ {254}, cc-pVTZ {406}, cc-pVQZ {710}, cc-pV5Z {1178}, aug-cc-pVDZ {318}, aug-cc-pVTZ {546}, aug-cc-pVQZ {970}] were used for analysis of the barrier height in comparison with the frequently used B3LYP functional. The number of basis functions for the [(CH<sub>3</sub>)<sub>2</sub>S·Cl] system is given in curly brackets. Figure S.1 summarizes the results for the barrier height relative to the reactants. The M05/cc-VDZ method which worked very well for the properties of dimethyl sulfide predicts by far the smallest barrier. The barrier height converges quickly with basis sets containing diffuse functions (109.8 kJ/mol for the M05 functional), but this convergence seems to be much slower with correlation consistent basis sets than with the Pople basis sets. Moreover, diffuse functions on the light atoms do not have a large impact on the barrier height and can be neglected in this study. The relatively small 6-311+G(2d,p) {247} basis set predicts a barrier height of 109.8 kJ/mol which compares well with 110.4 kJ/mol obtained with the aug-cc-pVTZ {546}. Further, the scoring function  $\sigma_{\text{tot}}$  is 0.0815 for the 6-311+G(2d,p) basis set compared to 0.1243 for the aug-cc-pVTZ basis set. Table S.1 shows further that the M05 functional in combination with a triple  $\zeta$  basis set provides generally a better description of dimethyl sulfide than the GGA functionals recommended by Swart *et*

al. [3]. Justified by the calculations presented here, the analysis of the conversion of  $(\text{CH}_3)_3\text{SCl}$  was done using the M05 functional with the 6-311+G(2d,p) basis set.

## References

- [1] National Institute of Standards and Technology *NIST Computational Chemistry Comparison and Benchmark Database, NIST Standard Reference Database Number 101, Release 15b, August 2011, Editor: Russell D. Johnson III.*  
URL <http://cccbdb.nist.gov/>
- [2] M. J. Frisch *et al.*; *Gaussian 09*; Revision B.01; Gaussian, Inc., Wallingford CT 2010.
- [3] Swart, M.; Solà, M.; Bickelhaupt, F. M. *J. Comp. Chem.* **2007**, *28*, 1551–1560.
- [4] Zhao, Y.; Schultz, N. E.; Truhlar, D. G. *J. Chem. Phys.* **2005**, *123*, 161103–161106.

|               | HF     | MP2    | B3LYP  | OLYP   | OPBE   | O3LYP  | X3LYP  | PBE1PBE | M05    | M05-2X |
|---------------|--------|--------|--------|--------|--------|--------|--------|---------|--------|--------|
| 6-31G(d,p)    | 1.808  | 1.8047 | 1.8255 | 1.8218 | 1.8048 | 1.8147 | 1.8236 | 1.807   | 1.8087 | 1.814  |
| 6-31+G(d,p)   | 1.8078 | 1.8046 | 1.8259 | 1.822  | 1.8044 | 1.8147 | 1.8241 | 1.8069  | 1.8086 | 1.8141 |
| 6-31++G(d,p)  | 1.8078 | 1.8046 | 1.8258 | 1.822  | 1.8043 | 1.8147 | 1.824  | 1.8069  | 1.8086 | 1.8141 |
| 6-311G(d,p)   | 1.8087 | 1.8022 | 1.8245 | 1.821  | 1.8035 | 1.8138 | 1.8227 | 1.8058  | 1.8076 | 1.8121 |
| 6-311+G(d,p)  | 1.8085 | 1.8023 | 1.8243 | 1.8208 | 1.8033 | 1.8135 | 1.8225 | 1.8056  | 1.8075 | 1.8119 |
| 6-311++G(d,p) | 1.8086 | 1.8026 | 1.8244 | 1.8209 | 1.8035 | 1.8137 | 1.8225 | 1.8058  | 1.8076 | 1.812  |
| D95+(d,p)     | 1.8112 | 1.8122 | 1.8265 | 1.8219 | 1.805  | 1.8152 | 1.8248 | 1.8083  | 1.8093 | 1.8145 |
| D95++(d,p)    | 1.8111 | 1.8123 | 1.8265 | 1.8218 | 1.805  | 1.8152 | 1.8247 | 1.8082  | 1.8092 | 1.8144 |
| cc-pVDZ       | 1.8129 | 1.8144 | 1.8265 | 1.8203 | 1.8033 | 1.8141 | 1.8246 | 1.808   | 1.8067 | 1.8152 |
| aug-cc-pVDZ   | 1.8144 | 1.8216 | 1.829  | 1.8234 | 1.8059 | 1.8168 | 1.8272 | 1.8101  | 1.8094 | 1.8172 |
| cc-pVTZ       | 1.8059 | 1.8038 | 1.819  | 1.816  | 1.7993 | 1.809  | 1.8172 | 1.8011  | 1.8061 | 1.8067 |
| aug-cc-pVTZ   | 1.8059 | 1.8045 | 1.8191 | 1.8163 | 1.7995 | 1.8092 | 1.8173 | 1.8013  | 1.806  | 1.8068 |

Table S.2: CS bond length in  $(\text{CH}_3)_2\text{S}$  calculated at various computational levels. All values given in Å. Reference value from CCCBDB [1]: 1.802 Å.

|               | HF     | MP2    | B3LYP  | OLYP   | OPBE   | O3LYP  | X3LYP  | PBE1PBE | M05    | M05-2X |
|---------------|--------|--------|--------|--------|--------|--------|--------|---------|--------|--------|
| 6-31G(d,p)    | 1.0829 | 1.0882 | 1.0931 | 1.0968 | 1.0973 | 1.0933 | 1.0928 | 1.0933  | 1.0923 | 1.0894 |
| 6-31+G(d,p)   | 1.0831 | 1.0892 | 1.0936 | 1.0974 | 1.0976 | 1.0938 | 1.0934 | 1.0937  | 1.0928 | 1.0898 |
| 6-31++G(d,p)  | 1.0831 | 1.0892 | 1.0936 | 1.0974 | 1.0976 | 1.0939 | 1.0934 | 1.0937  | 1.0928 | 1.0898 |
| 6-311G(d,p)   | 1.0829 | 1.0925 | 1.0913 | 1.0952 | 1.0962 | 1.0919 | 1.0911 | 1.0921  | 1.0918 | 1.088  |
| 6-311+G(d,p)  | 1.0831 | 1.0927 | 1.0915 | 1.0957 | 1.0966 | 1.0923 | 1.0913 | 1.0924  | 1.092  | 1.0882 |
| 6-311++G(d,p) | 1.0831 | 1.0926 | 1.0915 | 1.0957 | 1.0967 | 1.0923 | 1.0913 | 1.0924  | 1.092  | 1.0881 |
| D95+(d,p)     | 1.0835 | 1.0923 | 1.0953 | 1.0992 | 1.0985 | 1.0955 | 1.095  | 1.0948  | 1.0931 | 1.0912 |
| D95++(d,p)    | 1.0836 | 1.0921 | 1.0952 | 1.0991 | 1.0986 | 1.0954 | 1.095  | 1.0947  | 1.0931 | 1.0912 |
| cc-pVDZ       | 1.0885 | 1.1022 | 1.1011 | 1.1039 | 1.1033 | 1.1005 | 1.1008 | 1.1003  | 1.0994 | 1.0963 |
| aug-cc-pVDZ   | 1.1022 | 1.1006 | 1.0978 | 1.1009 | 1.1013 | 1.0976 | 1.0975 | 1.0978  | 1.0968 | 1.0937 |
| cc-pVTZ       | 1.0811 | 1.0881 | 1.0891 | 1.0944 | 1.0961 | 1.0909 | 1.0889 | 1.0906  | 1.0886 | 1.0857 |
| aug-cc-pVTZ   | 1.081  | 1.0887 | 1.0889 | 1.0944 | 1.0962 | 1.0908 | 1.0887 | 1.0905  | 1.0885 | 1.0856 |

Table S.3: Average CH bond length in  $(\text{CH}_3)_2\text{S}$  calculated at various computational levels. All values given in Å. Reference value from CCCBDB [1]: 1.091 Å.

|               | HF       | MP2     | B3LYP   | OLYP     | OPBE     | O3LYP    | X3LYP   | PBE1PBE | M05     | M05-2X  |
|---------------|----------|---------|---------|----------|----------|----------|---------|---------|---------|---------|
| 6-31G(d,p)    | 100.1768 | 98.4386 | 99.6475 | 100.5473 | 100.6788 | 100.3624 | 99.5452 | 99.4667 | 99.2485 | 98.2466 |
| 6-31+G(d,p)   | 100.1173 | 98.2991 | 99.6194 | 100.5045 | 100.593  | 100.3117 | 99.5209 | 99.4118 | 99.2278 | 98.2081 |
| 6-31++G(d,p)  | 100.1104 | 98.2432 | 99.6139 | 100.5036 | 100.6035 | 100.3108 | 99.5142 | 99.4074 | 99.2209 | 98.1915 |
| 6-311G(d,p)   | 100.2581 | 98.2295 | 99.6939 | 100.7274 | 100.942  | 100.5057 | 99.591  | 99.503  | 99.2409 | 98.1633 |
| 6-311+G(d,p)  | 100.2472 | 98.1259 | 99.6692 | 100.69   | 100.9006 | 100.4735 | 99.5669 | 99.4796 | 99.2246 | 98.144  |
| 6-311++G(d,p) | 100.2606 | 98.1211 | 99.6727 | 100.682  | 100.8932 | 100.4677 | 99.5684 | 99.4797 | 99.2153 | 98.1521 |
| D95+(d,p)     | 100.1625 | 98.2278 | 99.5704 | 100.3587 | 100.571  | 100.1956 | 99.466  | 99.3881 | 99.3489 | 98.0557 |
| D95++(d,p)    | 100.1658 | 98.1892 | 99.5674 | 100.3587 | 100.5783 | 100.1995 | 99.4625 | 99.3952 | 99.3516 | 98.0637 |
| cc-pVDZ       | 100.1994 | 98.0166 | 99.4642 | 100.3346 | 100.7251 | 100.2019 | 99.3476 | 99.4511 | 99.0335 | 98.3055 |
| aug-cc-pVDZ   | 100.1689 | 97.7688 | 99.4903 | 100.3525 | 100.5879 | 100.2006 | 99.3865 | 99.368  | 99.123  | 98.1733 |
| cc-pVTZ       | 100.3355 | 98.0045 | 99.7695 | 100.6556 | 100.8399 | 100.4642 | 99.6596 | 99.5269 | 99.1877 | 98.2145 |
| aug-cc-pVTZ   | 100.3802 | 97.9307 | 99.8115 | 100.7023 | 100.8723 | 100.5098 | 99.7022 | 99.5533 | 99.2053 | 98.2208 |

Table S.4: CSC bond angle in  $(\text{CH}_3)_2\text{S}$  calculated at various computational levels. All values given in degrees. Reference value from CCCBDB [1]:  $98.9^\circ$ .

|               | HF       | MP2      | B3LYP    | OLYP     | OPBE     | O3LYP    | X3LYP    | PBE1PBE  | M05      | M05-2X   |
|---------------|----------|----------|----------|----------|----------|----------|----------|----------|----------|----------|
| 6-31G(d,p)    | 109.0327 | 108.8533 | 109.0739 | 108.9261 | 108.7506 | 108.9157 | 109.069  | 108.9214 | 109.009  | 109.2603 |
| 6-31+G(d,p)   | 109.0383 | 108.8679 | 109.0668 | 108.8915 | 108.6993 | 108.8862 | 109.0607 | 108.8948 | 108.9824 | 109.2542 |
| 6-31++G(d,p)  | 109.0507 | 108.8949 | 109.0658 | 108.8919 | 108.7098 | 108.8882 | 109.0592 | 108.9001 | 108.986  | 109.2578 |
| 6-311G(d,p)   | 109.1832 | 108.8789 | 109.1754 | 109.0920 | 108.9324 | 109.0713 | 109.1731 | 109.0418 | 109.1628 | 109.3329 |
| 6-311+G(d,p)  | 109.1659 | 108.8685 | 109.1586 | 109.0598 | 108.8944 | 109.0433 | 109.1554 | 109.0224 | 109.1470 | 109.3273 |
| 6-311++G(d,p) | 109.1756 | 108.8895 | 109.1697 | 109.0649 | 108.9014 | 109.0500 | 109.1660 | 109.0352 | 109.1570 | 109.3443 |
| D95+(d,p)     | 109.1629 | 109.1276 | 109.1453 | 108.9597 | 108.8178 | 108.9653 | 109.1379 | 109.0060 | 109.1156 | 109.2929 |
| D95++(d,p)    | 109.1647 | 109.1325 | 109.1412 | 108.9554 | 108.8182 | 108.9625 | 109.1336 | 109.0058 | 109.1135 | 109.2933 |
| cc-pVDZ       | 109.2024 | 109.0073 | 109.1492 | 108.9815 | 108.8661 | 108.9969 | 109.1464 | 109.0440 | 109.0584 | 109.3933 |
| aug-cc-pVDZ   | 109.2834 | 109.2912 | 109.2372 | 109.0913 | 108.9904 | 109.0944 | 109.2346 | 109.1423 | 109.1506 | 109.4990 |
| cc-pVTZ       | 109.1802 | 109.1829 | 109.2003 | 109.0866 | 108.9664 | 109.0747 | 109.1965 | 109.1008 | 109.3035 | 109.4394 |
| aug-cc-pVTZ   | 109.2131 | 109.3717 | 109.2394 | 109.1330 | 108.9995 | 109.1174 | 109.2375 | 109.1377 | 109.3311 | 109.4702 |

Table S.5: Average HCH bond angle in  $(\text{CH}_3)_2\text{S}$  calculated at various computational levels. All values given in degrees. Reference value from CCCBDB [1]: 109.6°.



|               | HF     | MP2    | B3LYP  | OLYP   | OPBE   | O3LYP  | X3LYP  | PBE1PBE | M05    | M05-2X |
|---------------|--------|--------|--------|--------|--------|--------|--------|---------|--------|--------|
| 6-31G(d,p)    | 1.8049 | 1.7796 | 1.7182 | 1.7035 | 1.7395 | 1.7227 | 1.7201 | 1.7589  | 1.7360 | 1.8080 |
| 6-31+G(d,p)   | 1.8619 | 1.8320 | 1.7463 | 1.7306 | 1.7541 | 1.7509 | 1.7499 | 1.7776  | 1.7605 | 1.8434 |
| 6-31++G(d,p)  | 1.8607 | 1.8303 | 1.7356 | 1.7106 | 1.7379 | 1.7354 | 1.7384 | 1.7686  | 1.7480 | 1.8368 |
| 6-311G(d,p)   | 1.8479 | 1.8038 | 1.7114 | 1.7196 | 1.7431 | 1.7347 | 1.7155 | 1.7443  | 1.6959 | 1.8054 |
| 6-311+G(d,p)  | 1.8314 | 1.7875 | 1.6873 | 1.6928 | 1.7188 | 1.7098 | 1.6906 | 1.7221  | 1.6723 | 1.7828 |
| 6-311++G(d,p) | 1.8370 | 1.7939 | 1.6939 | 1.6915 | 1.7184 | 1.7111 | 1.6967 | 1.7277  | 1.6753 | 1.7920 |
| D95+(d,p)     | 1.9242 | 1.8965 | 1.7801 | 1.7318 | 1.7761 | 1.7623 | 1.7812 | 1.8174  | 1.8403 | 1.8590 |
| D95++(d,p)    | 1.9191 | 1.8920 | 1.7762 | 1.7280 | 1.7706 | 1.7584 | 1.7773 | 1.8127  | 1.8367 | 1.8535 |
| cc-pVDZ       | 1.6702 | 1.6449 | 1.4711 | 1.4295 | 1.5205 | 1.4698 | 1.4678 | 1.5455  | 1.4840 | 1.5982 |
| aug-cc-pVDZ   | 1.8084 | 1.7922 | 1.6301 | 1.5709 | 1.6001 | 1.6048 | 1.6316 | 1.6614  | 1.6363 | 1.7342 |
| cc-pVTZ       | 1.7257 | 1.7060 | 1.5598 | 1.5046 | 1.5512 | 1.5392 | 1.5586 | 1.6009  | 1.5289 | 1.6658 |
| aug-cc-pVTZ   | 1.7757 | 1.7559 | 1.6037 | 1.5620 | 1.5847 | 1.5913 | 1.6051 | 1.6320  | 1.5663 | 1.6957 |

Table S.6: Dipole moment of  $(\text{CH}_3)_2\text{S}$  calculated at various computational levels. All values given in Debye. Reference value from CCCBDB [1]: 1.5 Debye.

|               | HF    | MP2   | B3LYP | OLYP  | OPBE  | O3LYP | X3LYP | PBE1PBE | M05   | M05-2X |
|---------------|-------|-------|-------|-------|-------|-------|-------|---------|-------|--------|
| 6-31G(d,p)    | 286.5 | 278.1 | 258.8 | 261.3 | 263.6 | 264.8 | 259.5 | 263.2   | 275.7 | 263.5  |
| 6-31+G(d,p)   | 287.3 | 279.5 | 259.9 | 262.5 | 264.6 | 265.9 | 260.7 | 264.4   | 277.2 | 265.3  |
| 6-31++G(d,p)  | 287.1 | 279.6 | 259.7 | 262.4 | 264.5 | 265.8 | 260.5 | 264.2   | 277.1 | 265.1  |
| 6-311G(d,p)   | 284.7 | 273.5 | 259.4 | 261.4 | 261.8 | 264.5 | 260.1 | 261.8   | 269.9 | 267.3  |
| 6-311+G(d,p)  | 285.0 | 276.7 | 259.8 | 261.9 | 262.5 | 265.0 | 260.5 | 262.2   | 270.6 | 267.8  |
| 6-311++G(d,p) | 285.0 | 277.1 | 259.6 | 261.7 | 262.1 | 264.8 | 260.3 | 262.0   | 270.6 | 268.0  |
| D95+(d,p)     | 283.2 | 270.9 | 259.6 | 263.4 | 264.8 | 266.1 | 260.3 | 263.1   | 276.4 | 268.1  |
| D95++(d,p)    | 283.3 | 271.4 | 259.6 | 263.3 | 264.7 | 266.1 | 260.3 | 263.0   | 276.4 | 268.2  |
| cc-pVDZ       | 282.1 | 267.1 | 257.2 | 262.8 | 265.5 | 265.4 | 257.8 | 261.4   | 276.2 | 259.0  |
| aug-cc-pVDZ   | 279.5 | 260.7 | 254.7 | 259.0 | 260.9 | 261.8 | 255.4 | 258.3   | 274.6 | 256.6  |
| cc-pVTZ       | 282.3 | 264.3 | 258.6 | 260.9 | 260.5 | 263.7 | 259.3 | 259.9   | 269.4 | 261.8  |
| aug-cc-pVTZ   | 282.1 | 265.5 | 258.2 | 260.7 | 260.5 | 263.4 | 258.9 | 259.5   | 268.6 | 262.0  |

Table S.7: CSC scissoring vibration ( $A_1$ ) in  $(\text{CH}_3)_2\text{S}$  calculated at various computational levels. All values given in  $\text{cm}^{-1}$ . Reference value from CCCBDB [1]:  $282 \text{ cm}^{-1}$ .

|               | HF    | MP2   | B3LYP | OLYP  | OPBE  | O3LYP | X3LYP | PBE1PBE | M05   | M05-2X |
|---------------|-------|-------|-------|-------|-------|-------|-------|---------|-------|--------|
| 6-31G(d,p)    | 752.5 | 741.7 | 685.6 | 679.5 | 708.4 | 696.4 | 689.4 | 720.2   | 712.8 | 723.7  |
| 6-31+G(d,p)   | 751.8 | 739.6 | 683.3 | 677.3 | 707.5 | 694.6 | 687.1 | 719.0   | 711.1 | 722.6  |
| 6-31++G(d,p)  | 751.8 | 739.6 | 683.2 | 677.2 | 707.4 | 694.5 | 687.0 | 718.9   | 711.0 | 722.5  |
| 6-311G(d,p)   | 743.6 | 739.3 | 678.2 | 672.1 | 702.1 | 689.3 | 682.0 | 713.5   | 706.5 | 716.5  |
| 6-311+G(d,p)  | 744.1 | 739.1 | 678.4 | 672.0 | 702.1 | 689.3 | 682.1 | 713.6   | 706.7 | 716.9  |
| 6-311++G(d,p) | 744.3 | 738.8 | 678.5 | 672.1 | 702.1 | 689.3 | 682.3 | 713.7   | 706.8 | 717.1  |
| D95+(d,p)     | 753.9 | 735.0 | 689.8 | 685.0 | 713.5 | 701.5 | 693.5 | 724.2   | 720.1 | 725.8  |
| D95++(d,p)    | 753.8 | 734.8 | 689.7 | 684.9 | 713.5 | 701.4 | 693.4 | 724.2   | 720.1 | 725.7  |
| cc-pVDZ       | 737.8 | 726.7 | 683.0 | 680.9 | 709.5 | 696.2 | 686.8 | 716.9   | 717.6 | 718.0  |
| aug-cc-pVDZ   | 737.6 | 712.6 | 678.8 | 676.5 | 707.1 | 692.3 | 682.5 | 714.4   | 712.4 | 717.7  |
| cc-pVTZ       | 742.4 | 727.0 | 680.6 | 676.4 | 707.0 | 692.8 | 684.4 | 716.5   | 711.3 | 716.3  |
| aug-cc-pVTZ   | 741.5 | 725.1 | 679.9 | 675.2 | 706.0 | 691.7 | 683.6 | 715.6   | 711.1 | 716.4  |

Table S.8: CS symmetrical stretch ( $A_1$ ) in  $(\text{CH}_3)_2\text{S}$  calculated at various computational levels. All values given in  $\text{cm}^{-1}$ . Reference value from CCCBDB [1]:  $695 \text{ cm}^{-1}$ .

|               | HF    | MP2   | B3LYP | OLYP  | OPBE  | O3LYP | X3LYP | PBE1PBE | M05   | M05-2X |
|---------------|-------|-------|-------|-------|-------|-------|-------|---------|-------|--------|
| 6-31G(d,p)    | 816.3 | 796.9 | 738.0 | 731.4 | 761.9 | 750.3 | 742.1 | 774.6   | 762.2 | 779.9  |
| 6-31+G(d,p)   | 815.3 | 794.3 | 735.7 | 729.0 | 760.6 | 748.3 | 739.7 | 773.2   | 760.5 | 778.8  |
| 6-31++G(d,p)  | 815.3 | 794.0 | 735.5 | 728.9 | 760.7 | 748.3 | 739.5 | 773.1   | 760.4 | 778.7  |
| 6-311G(d,p)   | 806.1 | 791.5 | 729.4 | 723.8 | 756.1 | 742.8 | 733.4 | 766.9   | 755.4 | 771.4  |
| 6-311+G(d,p)  | 806.6 | 790.8 | 729.6 | 723.8 | 756.1 | 742.8 | 733.6 | 767.1   | 755.6 | 771.4  |
| 6-311++G(d,p) | 806.7 | 790.5 | 729.7 | 723.8 | 756.1 | 742.9 | 733.7 | 767.2   | 755.7 | 771.7  |
| D95+(d,p)     | 816.9 | 788.8 | 741.4 | 736.3 | 767.1 | 754.8 | 745.4 | 778.1   | 768.8 | 781.6  |
| D95++(d,p)    | 816.6 | 788.4 | 741.3 | 736.2 | 767.0 | 754.7 | 745.2 | 778.0   | 768.7 | 781.5  |
| cc-pVDZ       | 800.4 | 779.2 | 733.5 | 730.9 | 762.1 | 748.4 | 737.4 | 770.0   | 765.9 | 774.1  |
| aug-cc-pVDZ   | 800.6 | 764.6 | 730.3 | 727.4 | 760.1 | 745.3 | 734.2 | 768.1   | 761.6 | 775.1  |
| cc-pVTZ       | 805.3 | 779.8 | 732.8 | 728.4 | 761.1 | 746.6 | 736.7 | 770.6   | 760.7 | 771.7  |
| aug-cc-pVTZ   | 804.7 | 777.4 | 732.2 | 727.3 | 760.0 | 745.7 | 736.1 | 769.8   | 760.6 | 771.7  |

Table S.9: CS asymmetrical stretch ( $B_2$ ) in  $(CH_3)_2S$  calculated at various computational levels. All values given in  $cm^{-1}$ . Reference value from CCCBDB [1]:  $743\text{ cm}^{-1}$ .

## S.2 Additional graphics

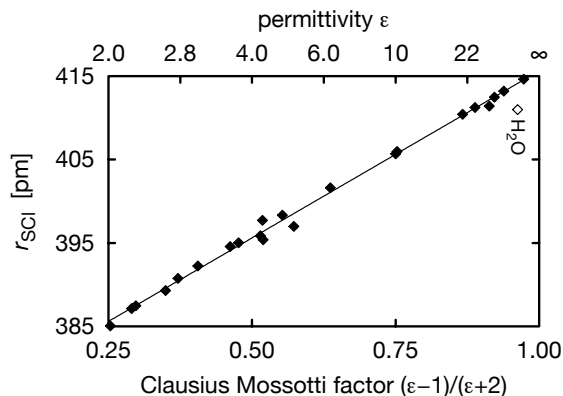

Figure S.2: Distance between S and Cl in  $[(\text{CH}_3)_3\text{S}^+ \cdot \text{Cl}^-]_{(\text{sol})}^{\text{tri}}$  as a function of *cmf*. The data point for water (marked in the plot with an empty diamond) as an obvious outlier was not included into the data set for the linear regression.

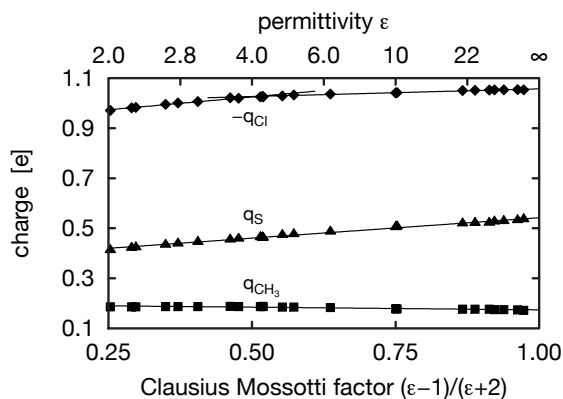

Figure S.3: ATP charges in the tripod ion pair.  $-q_{\text{Cl}}$ : diamonds,  $q_{\text{S}}$ : triangles,  $q_{\text{CH}_3}$ : squares.

### S.3 Annotated list of all symbols

|                                                 |                                                                                                                                                             |
|-------------------------------------------------|-------------------------------------------------------------------------------------------------------------------------------------------------------------|
| $[(\text{CH}_3)_3\text{SCl}]$                   | Concentration of the salt $(\text{CH}_3)_3\text{SCl}$                                                                                                       |
| $[(\text{CH}_3)_3\text{S}^+ \cdot \text{Cl}^-]$ | Ion pair concentration                                                                                                                                      |
| $[(\text{CH}_3)_3\text{S}]$                     | Concentration of the $(\text{CH}_3)_3\text{S}^+$ cation                                                                                                     |
| $[\text{Cl}^-]$                                 | Concentration of the $\text{Cl}^-$ anion                                                                                                                    |
| $C_{\text{ax}}$                                 | C atom in an axial position                                                                                                                                 |
| $C_{\text{eq}}$                                 | C atom in an equatorial position                                                                                                                            |
| $G^\ddagger$                                    | Gibbs free energy of linear transition state                                                                                                                |
| $G_{\text{ip}}$                                 | Gibbs free energy of the tripod ion pair                                                                                                                    |
| $G_{\text{free}}$                               | Gibbs free energy of the free ions                                                                                                                          |
| $K_{\text{H}_2\text{O}}$                        | Equilibrium constant for reaction 1 in water                                                                                                                |
| $K_{\text{A}}$                                  | Association constant                                                                                                                                        |
| $R$                                             | Ideal gas constant                                                                                                                                          |
| $T$                                             | Temperature                                                                                                                                                 |
| WBI                                             | Wiberg bond index                                                                                                                                           |
| $X_{\text{ip}}$                                 | Mole fraction of the ion pair in solution.                                                                                                                  |
| $\Delta E^\ddagger$                             | Energy difference between the linear transition state and the free ions                                                                                     |
| $\Delta E_{\text{H}_2\text{O}}^\ddagger$        | $\Delta E^\ddagger$ for reaction 1 in water                                                                                                                 |
| $\Delta E_{\text{reac}}^{\text{ZP}}$            | Zero point corrected version of $\Delta E_{\text{reac}}$                                                                                                    |
| $\Delta E_{\text{reac}}$                        | Change in electronic energy for reaction 1                                                                                                                  |
| $\Delta E_{\text{S}_N1}$                        | Combined electronic energies of $\text{CH}_3^+$ , $(\text{CH}_3)_2\text{S}$ and $\text{Cl}^-$ relative to the combined electronic energies of the free ions |
| $\Delta E_{\text{ip}}$                          | Electronic energy relative to that of the tripod ion pair                                                                                                   |
| $\Delta E_{\text{pro}}$                         | Electronic energy of the products relative to that of the free ions                                                                                         |
| $\Delta E_{\text{see}}$                         | Electronic energy of the seesaw ion pair relative to that of the free ions                                                                                  |
| $\Delta E_{\text{tri}}$                         | Electronic energy of the tripod ion pair relative to that of the free ions                                                                                  |
| $\Delta G^\ddagger$                             | Gibbs free energy of the linear transition state relative to that of the free ions                                                                          |
| $\Delta G_{\text{EtOH}}^\ddagger$               | $\Delta G^\ddagger$ in ethanol                                                                                                                              |
| $\Delta G_{\text{H}_2\text{O}}^\ddagger$        | $\Delta G^\ddagger$ in water                                                                                                                                |
| $\Delta G_{\text{mix}}^\ddagger$                | Effective value of $\Delta G^\ddagger$ as defined in Equation 33                                                                                            |
| $\Delta G_{\text{ip}}^\ddagger$                 | Gibbs free energy of the linear transition state relative to that of the tripod ion pair                                                                    |
| $\Delta G_{\text{front}}^\ddagger$              | Gibbs free energy of a transition state for a frontside attack relative to that of the free ions                                                            |
| $\Delta G_{\text{S}_N1}$                        | Combined Gibbs free energies of $\text{CH}_3^+$ , $(\text{CH}_3)_2\text{S}$ and $\text{Cl}^-$ relative to the combined Gibbs free energies of the free ions |
| $\Delta G_{\text{ip}}$                          | Gibbs free energy of the tripod ion pair relative to that of the free ions                                                                                  |
| $\Delta G_{\text{diss}}$                        | Change in Gibbs free energy for the dissociation of a product cluster                                                                                       |
| $\Delta G_{\text{pro}}$                         | Gibbs free energy of the products relative to the free ions                                                                                                 |
| $\Delta G_{\text{reac}}$                        | Change in Gibbs free energy for reaction 1                                                                                                                  |
| $\Delta G_{\text{see}}$                         | Gibbs free energy of the seesaw ion pair relative to that of the free ions                                                                                  |
| $\Delta G_{\text{tri}}$                         | Gibbs free energy of the tripod ion pair relative to that of the free ions                                                                                  |

|                                                                    |                                                                                                                                                                     |
|--------------------------------------------------------------------|---------------------------------------------------------------------------------------------------------------------------------------------------------------------|
| $\Delta H^\ddagger$                                                | Enthalpy of the linear transition state relative to that of the free ions                                                                                           |
| $\Delta H_{\text{reac}}$                                           | Change in enthalpy for reaction 1                                                                                                                                   |
| $\Delta U^\ddagger$                                                | Inner energy of the linear transition state relative to that of the free ions                                                                                       |
| $\Delta U_{\text{reac}}$                                           | Change in inner energy for reaction 1                                                                                                                               |
| $\Delta \mu_i$                                                     | Difference in dipole moment between experiment and calculation for $(\text{CH}_3)_2\text{S}$                                                                        |
| $\Delta \omega_i$                                                  | Difference in bond angle between experiment and calculation for $(\text{CH}_3)_2\text{S}$                                                                           |
| $\Delta \rho$                                                      | Change in electron density, PCM model                                                                                                                               |
| $\Delta \rho^{\text{ex}}$                                          | Change in electron density, explicit water molecules                                                                                                                |
| $\Delta \xi$                                                       | Change in stoichiometric factors                                                                                                                                    |
| $\Delta f_i$                                                       | Difference in frequency between experiment and calculation for $(\text{CH}_3)_2\text{S}$                                                                            |
| $\Delta r_i$                                                       | Difference in bond length between experiment and calculation for $(\text{CH}_3)_2\text{S}$                                                                          |
| $\Delta_{\text{front}}^{\text{back}} E^\ddagger$                   | Electronic energy difference between a transition states for a frontside attack and that for the backside attack                                                    |
| $\Delta_{\text{front}}^{\text{back}} G^\ddagger$                   | Gibbs free energy difference between a transition states for a frontside attack and that for the backside attack                                                    |
| $\Delta_{\text{front}}^{\text{back}} q_{\text{CH}_3}^{\text{NBO}}$ | Difference in NBO charge on the moving $\text{CH}_3$ group between a transition states for a frontside attack and that for the backside attack                      |
| $\Delta_{\text{see}}^{\text{tri}} G$                               | Difference in Gibbs free energy between the seesaw and the tripod ion pair                                                                                          |
| $\Delta_{12} G$                                                    | Change in Gibbs free energy for reaction 12                                                                                                                         |
| $\Delta_{14} E^\ddagger$                                           | Electronic energy of the transition state of reaction 14 relative to that of the reactants $\text{H}_2\text{O}$ and $(\text{CH}_3)_3\text{S}^+$                     |
| $\Delta_{14} G^\ddagger$                                           | Gibbs free energy of the transition state of reaction 14 relative to that of the reactants $\text{H}_2\text{O}$ and $(\text{CH}_3)_3\text{S}^+$                     |
| $\Delta_{16} G$                                                    | Change in Gibbs free energy of reaction 16                                                                                                                          |
| $\Delta_{17} G$                                                    | Change in Gibbs free energy of reaction 17                                                                                                                          |
| $\Delta_{19} E^\ddagger$                                           | Electronic energy of the transition state for reaction relative to that of the reactants $\text{CH}_3\text{Cl}$ and $\text{H}_2\text{O}$                            |
| $\Delta_{19} G^\ddagger$                                           | Gibbs free energy of the transition state for reaction relative to that of the reactants $\text{CH}_3\text{Cl}$ and $\text{H}_2\text{O}$                            |
| $\Delta_{19} G$                                                    | Change in Gibbs free energy of reaction 19                                                                                                                          |
| $\Delta_{19} H^\ddagger$                                           | Enthalpy of the transition state for reaction relative to that of the reactants $\text{CH}_3\text{Cl}$ and $\text{H}_2\text{O}$                                     |
| $\Delta_{20} G$                                                    | Change in Gibbs free energy of reaction 20                                                                                                                          |
| $\chi$                                                             | Acceleration factor, prototype given in Equation 31                                                                                                                 |
| $\chi_{1\text{M}}$                                                 | Acceleration factor (Equation 31), using Equation 33 for the difference in Gibbs free energy and an initial $(\text{CH}_3)_3\text{SCl}$ salt concentration of 1 M   |
| $\chi_{20\text{mM}}$                                               | Acceleration factor (Equation 31), using Equation 33 for the difference in Gibbs free energy and an initial $(\text{CH}_3)_3\text{SCl}$ salt concentration of 20 mM |
| $\chi_{10\text{mM}}$                                               | Acceleration factor (Equation 31), using Equation 33 for the difference in Gibbs free energy and an initial $(\text{CH}_3)_3\text{SCl}$ salt concentration of 10 mM |
| $\chi_{1\text{mM}}$                                                | Acceleration factor (Equation 31), using Equation 33 for the difference in Gibbs free energy and an initial $(\text{CH}_3)_3\text{SCl}$ salt concentration of 1 mM  |
| $\chi_{\text{fi}}$                                                 | Acceleration factor (Equation 31) for reaction 1 starting from free ions                                                                                            |
| $\chi_{\text{ip}}$                                                 | Acceleration factor (Equation 31) for reaction 1 starting from an ion pair                                                                                          |

|                                         |                                                                                                                   |
|-----------------------------------------|-------------------------------------------------------------------------------------------------------------------|
| $\delta G$                              | Correction to standard Gibbs free energy from quantum calculations for particle densities (Equation 7)            |
| $\epsilon$                              | Dielectric constant of a solvent                                                                                  |
| $pK_A$                                  | Negative decadic logarithm of the acid constant $K_A$                                                             |
| $\mu$                                   | Calculated dipole moment                                                                                          |
| $\mu^{\text{ref}}$                      | Measured dipole moment of $(\text{CH}_3)_2\text{S}$ used as reference value                                       |
| $\omega_1$                              | Optimised CSC bond angle                                                                                          |
| $\omega_2$                              | Optimised, average HCH angle                                                                                      |
| $\omega_i^{\text{ref}}$                 | Experimental reference values of the calculated bond angles                                                       |
| $\rho$                                  | Electron density                                                                                                  |
| $\rho_{\text{C}_6\text{H}_{12}}$        | Electron density in cyclohexane                                                                                   |
| $\rho_{\text{H}_2\text{O}}$             | Electron density in water, PCM                                                                                    |
| $\rho_{\text{H}_2\text{O}}^{\text{ex}}$ | Electron density in water, explicit solvent molecules                                                             |
| $\rho_{\text{vac}}$                     | Electron density in the vacuum                                                                                    |
| $\sigma_{\text{tot}}$                   | Quality function to judge computational methods on the basis of experimental data for $(\text{CH}_3)_2\text{S}$   |
| $\xi_{\text{pro}}$                      | Stoichiometric factors of the products                                                                            |
| $\xi_{\text{rea}}$                      | Stoichiometric factors of the reactants                                                                           |
| $\xi_i$                                 | Stoichiometric factors of a compound                                                                              |
| $c_0$                                   | initial $(\text{CH}_3)_3\text{SCl}$ salt concentration                                                            |
| $cmf$                                   | Clausius Mossotti factor                                                                                          |
| $e$                                     | Elementary positive charge                                                                                        |
| $f_i^{\text{ref}}$                      | Experimental reference values for the frequency of vibrations involving the CS bonds in $(\text{CH}_3)_2\text{S}$ |
| $f_{1\dots 3}$                          | Calculated frequencies for vibrations involving the the CS bonds in $(\text{CH}_3)_2\text{S}$                     |
| $h$                                     | Planck constant                                                                                                   |
| $k_A$                                   | Rate constant for the formation of an ion pair (association)                                                      |
| $k'_A$                                  | Rate constant for the dissociation of an ion pair                                                                 |
| $k_B$                                   | Boltzmann constant                                                                                                |
| $k_{29}$                                | Rate constant as defined in Equation 29                                                                           |
| $k_{28}$                                | Rate constant as defined in Equation 28                                                                           |
| $k_{19}$                                | Rate constant as defined in Equation 19                                                                           |
| $k_{14}$                                | Rate constant as defined in Equation 14                                                                           |
| $k_{\text{fi}}$                         | Rate constant for the reaction starting from free ions                                                            |
| $k_{\text{fi}}^{\text{EtOH}}$           | Rate constant for the reaction starting from free ions in ethanol                                                 |
| $k_{\text{fi}}^{\text{H}_2\text{O}}$    | Rate constant for the reaction starting from free ions in water                                                   |
| $k_{\text{fi}}$                         | Rate constant for the reaction starting from free ions                                                            |
| $k_{\text{ip}}$                         | Rate constant for the reaction starting from ion pairs                                                            |
| $p$                                     | Pressure                                                                                                          |
| $q^{\text{APT}}$                        | APT charge                                                                                                        |
| $q_{\text{Cl}}^{\text{APT}}$            | APT charge on the chlorine atom                                                                                   |
| $q^{\text{NBO}}$                        | NBO charge                                                                                                        |
| $q_{\text{CH}_3}^{\text{NBO}}$          | NBO charge on the moving $\text{CH}_3$ group                                                                      |
| $q_{\text{Cl}}^{\text{NBO}}$            | NBO charge on the chlorine atom                                                                                   |



|                               |                                                                               |
|-------------------------------|-------------------------------------------------------------------------------|
| $r$                           | Bond distance                                                                 |
| $r_1$                         | Calculated CS bond length in $(\text{CH}_3)_2\text{S}$                        |
| $r_2$                         | Calculated average CH bond length in $(\text{CH}_3)_2\text{S}$                |
| $r_i^{\text{ref}}$            | Experimental reference values for $r_1$ and $r_2$                             |
| $r_{\text{C}\cdots\text{S}}$  | Distance between the C atom in the moving $\text{CH}_3$ group and the S atom  |
| $r_{\text{Cl}\cdots\text{C}}$ | Distance between the Cl atom and the C atom in the moving $\text{CH}_3$ group |
| $r_{\text{S}\cdots\text{Cl}}$ | Distance between the Cl and S atom                                            |
| $v$                           | rate of a reaction                                                            |
| $v_{\text{fi}}$               | rate of reaction 1 starting from free ions                                    |
| $v_{\text{ip}}$               | rate of reaction 1 starting from ion pairs                                    |
| $C_{2v}$                      | Point group in Schoenflies notation                                           |

## S.4 Computational setup for calculations with explicit solvent molecules

These calculations are targeted to create structural models for solvation shells.

- homebrew code
- Gaussian 09 for the calculation of forces and energies  
oniom(olyp/6-31G(d,p):amber=softfirst)=embedcharge
- Amber force field for the solvent
  - Parameter used as defined in Gaussian 09
  - Sulphur parameter from Biochemistry 41 (2002) 7636-7646  
The parameter for the CT-CT-CT-H1 dihedral angle as defined in G09 were used for the CT-SP-CT-H1 dihedral angle, because they reproduce the quantum results better.
  - Chloride parameter from J. Phys. Chem. B 112 (2008) 9020-9041
- oniom(olyp/6-31G(d,p) for  $(\text{CH}_3)_3\text{S}^+$ ,  $\text{Cl}^-$ ,  $(\text{CH}_3)_2\text{S}$  and  $\text{CH}_3\text{Cl}$
- spherical boundaries for the reaction vessel, no frozen hydrogen atoms
- sphere radius chosen to reproduce the experimental density of 300 water molecules at 298 K
- molecules placed into the equilibrated  $\text{H}_2\text{O}$  cluster in an optimised position to minimize the number of  $\text{H}_2\text{O}$  molecules to be removed from the cluster
- leap frog algorithm for the integration, 0.5 step size, 40000 steps for production runs
- Berendsen thermostat, 100 fs coupling constant
- size of the solvation shells from radial distribution functions
- DFT calculations on the solute with the first solvation shell every 50 fs

## S.5 Detailed data on the chloride ion

| solvent              | $\epsilon$ | $E$            | $G$         |
|----------------------|------------|----------------|-------------|
| Cyclo hexane         | 2.0165     | -460.350921526 | -460.365944 |
| Carbon tetrachloride | 2.228      | -460.356252664 | -460.371275 |
| Benzene              | 2.2706     | -460.357206769 | -460.372230 |
| Carbon disulfide     | 2.6105     | -460.363707826 | -460.378731 |
| Tetralin             | 2.771      | -460.366225009 | -460.381248 |
| Dibutyl ether        | 3.0473     | -460.369938942 | -460.384962 |
| Diethyl amine        | 3.5766     | -460.375454872 | -460.390478 |
| Diphenyl ether       | 3.73       | -460.376761538 | -460.391784 |
| Ethyl phenyl ether   | 4.1797     | -460.380040453 | -460.395063 |
| Anisole              | 4.2247     | -460.380330217 | -460.395353 |
| Ether                | 4.24       | -460.380427338 | -460.395450 |
| Chloroform           | 4.7113     | -460.383110575 | -460.398133 |
| 1-Bromo octane       | 5.0244     | -460.384615287 | -460.399638 |
| Acetic acid          | 6.2528     | -460.389065230 | -460.404088 |
| Pentanal             | 10.0       | -460.395890752 | -460.410914 |
| Dichloro ethane      | 10.125     | -460.396031427 | -460.411054 |
| Acetone              | 20.493     | -460.401727328 | -460.416750 |
| Ethanol              | 24.852     | -460.402703381 | -460.417726 |
| Methanol             | 32.613     | -460.403795516 | -460.418818 |
| Nitro methane        | 36.562     | -460.404173277 | -460.419196 |
| Dimethylsulfoxide    | 46.826     | -460.404857156 | -460.419880 |
| water                | 78.3553    | -460.405837513 | -460.420860 |
| formamide            | 108.94     | -460.406246313 | -460.421269 |

Table S.10: SCF energy ( $E$ ) with the include thermal correction ( $G$ ) of the chloride ion in various environments.

## S.6 Selected cluster geometries in formamide

### S.6.1 $(\text{CH}_3)_3\text{S}^+$ in formamide

Cartesian coordinates (input orientation)

|   |           |           |           |
|---|-----------|-----------|-----------|
| C | 0.000000  | 1.613189  | 0.267720  |
| H | 0.000000  | 1.493797  | 1.348817  |
| H | 0.891918  | 2.131560  | -0.077967 |
| H | -0.891918 | 2.131560  | -0.077967 |
| C | -1.396301 | -0.806489 | 0.265252  |
| H | -1.394354 | -1.838957 | -0.077514 |
| H | -1.298429 | -0.743108 | 1.346581  |
| H | -2.291417 | -0.297268 | -0.085074 |
| C | 1.396301  | -0.806489 | 0.265252  |
| H | 1.394354  | -1.838957 | -0.077514 |
| H | 2.291417  | -0.297268 | -0.085074 |
| H | 1.298429  | -0.743108 | 1.346581  |
| S | 0.000000  | 0.001537  | -0.525133 |

SCF energy : -517.694478702

Gibbs free energy: -517.607903

Frequencies

|           |           |           |           |           |           |           |
|-----------|-----------|-----------|-----------|-----------|-----------|-----------|
| 169.3402  | 219.5202  | 228.9316  | 269.8743  | 282.1918  | 317.4057  | 657.2160  |
| 734.5454  | 744.4695  | 904.2649  | 942.0754  | 948.3214  | 1046.9754 | 1051.9076 |
| 1059.8527 | 1329.0790 | 1330.1105 | 1363.9303 | 1417.8433 | 1423.1961 | 1425.1386 |
| 1436.0831 | 1438.3769 | 1448.1304 | 3089.2996 | 3092.3322 | 3100.1151 | 3203.5462 |
| 3207.9565 | 3210.2019 | 3211.6159 | 3213.7950 | 3218.8677 |           |           |

### S.6.2 Tripod ion pair in formamide

Cartesian coordinates (standard orientation)

|    |           |           |           |
|----|-----------|-----------|-----------|
| C  | 0.770451  | -0.708220 | 1.447033  |
| H  | -0.311530 | -0.644534 | 1.330990  |
| H  | 1.116682  | -1.737873 | 1.513963  |
| H  | 1.126860  | -0.139191 | 2.303588  |
| C  | 0.748637  | 1.607033  | -0.110020 |
| H  | 1.083748  | 2.063916  | -1.039394 |
| H  | -0.331593 | 1.462147  | -0.087315 |
| H  | 1.103402  | 2.188134  | 0.739091  |
| C  | 0.743245  | -0.900405 | -1.334597 |
| H  | 1.075988  | -0.449175 | -2.267244 |
| H  | 1.095245  | -1.928380 | -1.272079 |
| H  | -0.336428 | -0.825605 | -1.203833 |
| S  | 1.554305  | 0.002575  | -0.007372 |
| Cl | -2.592074 | -0.001241 | 0.005041  |

SCF energy : -978.107694287  
Gibbs free energy: -978.025877

Frequencies

|           |           |           |           |           |           |           |
|-----------|-----------|-----------|-----------|-----------|-----------|-----------|
| 73.7983   | 80.1683   | 96.5763   | 201.2943  | 222.8131  | 224.8322  | 273.3777  |
| 277.2243  | 310.6521  | 653.5617  | 728.4497  | 737.9062  | 910.0168  | 953.8382  |
| 958.0530  | 1052.7528 | 1055.8359 | 1066.5527 | 1322.7824 | 1325.4396 | 1355.9645 |
| 1418.7103 | 1422.9881 | 1432.3172 | 1440.1025 | 1444.7431 | 1447.1542 | 3067.5443 |
| 3069.8115 | 3071.4575 | 3188.0688 | 3189.8749 | 3192.4927 | 3200.7730 | 3203.1933 |
| 3207.5012 |           |           |           |           |           |           |

### S.6.3 Linear ion pair in formamide

Cartesian coordinates (standard orientation)

|    |           |           |           |
|----|-----------|-----------|-----------|
| C  | 2.146903  | -1.398078 | 0.453944  |
| H  | 1.756754  | -1.306445 | 1.465290  |
| H  | 1.771843  | -2.293090 | -0.038020 |
| H  | 3.234639  | -1.393868 | 0.442367  |
| C  | 2.146194  | 1.398474  | 0.453747  |
| H  | 1.771270  | 2.293254  | -0.038743 |
| H  | 1.755472  | 1.307105  | 1.464901  |
| H  | 3.233931  | 1.394398  | 0.442798  |
| C  | -0.164761 | -0.000319 | -0.264162 |
| H  | -0.563818 | 0.889049  | -0.745394 |
| H  | -0.563562 | -0.889761 | -0.745462 |
| H  | -0.374284 | -0.000353 | 0.802215  |
| S  | 1.612010  | -0.000020 | -0.540848 |
| Cl | -3.681437 | -0.000025 | 0.102497  |

SCF energy : -978.102981873  
Gibbs free energy: -978.022196

Frequencies

|           |           |           |           |           |           |           |
|-----------|-----------|-----------|-----------|-----------|-----------|-----------|
| 49.2308   | 63.0262   | 76.0440   | 165.9737  | 209.4604  | 220.2989  | 270.4543  |
| 278.3271  | 311.2423  | 655.5575  | 734.9000  | 740.8411  | 912.8708  | 945.4531  |
| 954.5043  | 1040.8156 | 1057.7884 | 1060.5935 | 1328.6157 | 1336.2070 | 1365.6360 |
| 1415.6126 | 1424.5259 | 1428.2589 | 1433.8104 | 1434.1870 | 1447.6554 | 3093.7083 |
| 3097.4291 | 3111.0030 | 3209.6370 | 3211.8062 | 3212.8341 | 3215.7583 | 3227.3705 |
| 3229.4757 |           |           |           |           |           |           |

### S.6.4 Linear transition state in formamide

Cartesian coordinates (standard orientation)

|   |          |          |          |
|---|----------|----------|----------|
| C | 1.630742 | 1.226506 | 1.388870 |
| H | 0.767202 | 1.889283 | 1.335623 |

|    |           |           |           |
|----|-----------|-----------|-----------|
| H  | 1.584772  | 0.626794  | 2.296531  |
| H  | 2.555047  | 1.802304  | 1.377490  |
| C  | 1.630742  | 1.226506  | -1.388870 |
| H  | 1.584772  | 0.626794  | -2.296531 |
| H  | 0.767202  | 1.889283  | -1.335623 |
| H  | 2.555047  | 1.802304  | -1.377490 |
| C  | -0.676128 | -0.561324 | 0.000000  |
| H  | -0.528471 | -1.080972 | -0.929712 |
| H  | -0.528471 | -1.080972 | 0.929712  |
| H  | -0.947568 | 0.479207  | 0.000000  |
| S  | 1.630742  | 0.074621  | 0.000000  |
| Cl | -2.906679 | -1.146946 | 0.000000  |

SCF energy : -978.062540272

Gibbs free energy: -977.983698

#### Frequencies

|           |           |           |           |           |           |           |
|-----------|-----------|-----------|-----------|-----------|-----------|-----------|
| -598.9327 | 70.8926   | 74.5423   | 89.3684   | 163.4433  | 178.0937  | 208.8970  |
| 249.7157  | 257.5035  | 287.7637  | 697.4580  | 748.7533  | 920.3690  | 942.3503  |
| 967.7096  | 997.3177  | 1004.5227 | 1046.4356 | 1057.0836 | 1318.9779 | 1344.0390 |
| 1357.2082 | 1365.6073 | 1428.6011 | 1436.8972 | 1441.6286 | 1446.9927 | 3069.9910 |
| 3070.8488 | 3167.9129 | 3171.6595 | 3171.7171 | 3181.3366 | 3182.2231 | 3374.5829 |
| 3383.5083 |           |           |           |           |           |           |

### S.6.5 Immediate product cluster in formamide

#### Cartesian coordinates (standard orientation)

|    |           |           |           |
|----|-----------|-----------|-----------|
| C  | -1.857306 | 1.411852  | 0.519651  |
| H  | -0.994425 | 1.243488  | 1.165628  |
| H  | -1.686732 | 2.304513  | -0.081298 |
| H  | -2.754077 | 1.551003  | 1.123881  |
| C  | -2.325838 | -1.309871 | 0.553925  |
| H  | -2.468786 | -2.221861 | -0.024594 |
| H  | -1.452776 | -1.425987 | 1.197453  |
| H  | -3.213803 | -1.124884 | 1.159129  |
| C  | 1.621731  | -0.100855 | -0.303126 |
| H  | 1.529768  | -0.596524 | -1.264580 |
| H  | 1.246922  | 0.916876  | -0.355633 |
| H  | 1.109165  | -0.662269 | 0.472674  |
| S  | -2.070811 | 0.032976  | -0.630305 |
| Cl | 3.363894  | -0.030513 | 0.121737  |

SCF energy : -978.097049969

Gibbs free energy: -978.019990

Frequencies

|           |           |           |           |           |           |           |
|-----------|-----------|-----------|-----------|-----------|-----------|-----------|
| 31.5210   | 59.2192   | 69.7531   | 75.1645   | 110.9013  | 115.8947  | 195.1474  |
| 200.0102  | 276.1201  | 701.5707  | 730.1288  | 754.6109  | 914.4378  | 956.3481  |
| 987.6363  | 1033.7728 | 1037.7112 | 1061.4718 | 1319.5721 | 1342.2055 | 1365.4611 |
| 1433.4378 | 1442.3363 | 1445.8308 | 1447.4356 | 1452.2637 | 1462.0072 | 3060.9132 |
| 3064.2296 | 3104.0602 | 3145.9164 | 3153.9599 | 3171.3025 | 3174.2806 | 3214.3999 |
| 3221.7435 |           |           |           |           |           |           |

**S.6.6 CH<sub>3</sub>Cl in formamide**

Cartesian coordinates (standard orientation)

|    |           |           |           |
|----|-----------|-----------|-----------|
| C  | 0.000000  | 0.000000  | -1.134645 |
| H  | 0.000000  | 1.033617  | -1.468236 |
| H  | 0.895138  | -0.516808 | -1.468236 |
| H  | -0.895138 | -0.516808 | -1.468236 |
| Cl | 0.000000  | 0.000000  | 0.659563  |

SCF energy : -500.112917812

Gibbs free energy: -500.097799

Frequencies

|           |           |           |           |           |           |           |
|-----------|-----------|-----------|-----------|-----------|-----------|-----------|
| 722.0195  | 1029.8359 | 1030.7071 | 1356.6864 | 1449.9848 | 1450.1278 | 3100.6679 |
| 3214.1278 | 3214.2659 |           |           |           |           |           |

**S.6.7 (CH<sub>3</sub>)<sub>2</sub>S in formamide**

Cartesian coordinates (standard orientation)

|   |           |           |           |
|---|-----------|-----------|-----------|
| C | -1.381445 | -0.510553 | 0.000001  |
| H | -1.357032 | -1.134818 | 0.894039  |
| H | -2.296975 | 0.080314  | -0.000006 |
| H | -1.357035 | -1.134822 | -0.894038 |
| C | 1.381445  | -0.510553 | 0.000001  |
| H | 2.296975  | 0.080314  | -0.000015 |
| H | 1.357037  | -1.134812 | 0.894044  |
| H | 1.357030  | -1.134828 | -0.894033 |
| S | 0.000000  | 0.656581  | 0.000000  |

SCF energy : -477.982273002

Gibbs free energy: -477.933766

Frequencies

|           |           |           |           |           |           |           |
|-----------|-----------|-----------|-----------|-----------|-----------|-----------|
| 187.5543  | 202.3516  | 270.5971  | 699.7143  | 750.6508  | 912.7005  | 948.0089  |
| 981.0100  | 1036.9320 | 1313.0675 | 1335.4274 | 1430.9159 | 1440.0397 | 1445.8738 |
| 1450.6268 | 3050.0491 | 3053.5234 | 3135.9841 | 3144.2772 | 3163.8294 | 3165.4571 |

### S.6.8 CH<sub>3</sub><sup>+</sup> in formamide

Cartesian coordinates (standard orientation)

|   |           |           |           |
|---|-----------|-----------|-----------|
| C | -0.000022 | 0.000005  | -0.000020 |
| H | 0.172503  | 1.071625  | 0.000040  |
| H | 0.842245  | -0.685124 | 0.000039  |
| H | -1.014617 | -0.386533 | 0.000040  |

SCF energy : -39.5708446881

Gibbs free energy: -39.558408

Frequencies

1377.2830 1382.4684 1405.6089 3084.7643 3286.6614 3292.5066

## S.7 Selected cluster geometries in water

### S.7.1 (CH<sub>3</sub>)<sub>3</sub>S<sup>+</sup> in water

Cartesian coordinates (input orientation)

|   |           |           |           |
|---|-----------|-----------|-----------|
| C | 0.000000  | 1.613173  | 0.271599  |
| H | 0.000000  | 1.493599  | 1.352669  |
| H | 0.891897  | 2.131585  | -0.074039 |
| H | -0.891897 | 2.131585  | -0.074039 |
| C | -1.395752 | -0.806475 | 0.270030  |
| H | -1.394784 | -1.838558 | -0.073876 |
| H | -1.295826 | -0.744311 | 1.351244  |
| H | -2.291185 | -0.296407 | -0.078190 |
| C | 1.395752  | -0.806475 | 0.270030  |
| H | 1.394784  | -1.838558 | -0.073876 |
| H | 2.291185  | -0.296407 | -0.078190 |
| H | 1.295826  | -0.744311 | 1.351244  |
| S | 0.000000  | 0.001559  | -0.521293 |

SCF energy : -517.694165921

Gibbs free energy: -517.607594

Frequencies

164.0708 222.4960 229.8099 271.9872 281.6985 317.7987 657.4865  
734.6527 744.4657 904.0014 941.6982 948.7244 1047.6644 1051.6064  
1060.4654 1329.1941 1329.7359 1364.3606 1416.9690 1423.2144 1425.4876  
1436.4000 1438.2950 1448.5125 3088.7870 3092.4409 3100.1637 3203.0428  
3208.2375 3209.9367 3211.6185 3213.8867 3218.9324



### S.7.2 Tripod ion pair in water

Cartesian coordinates (standard orientation)

|    |           |           |           |
|----|-----------|-----------|-----------|
| C  | 0.726805  | -0.132936 | 1.604861  |
| H  | -0.352589 | -0.120070 | 1.449641  |
| H  | 1.067379  | -1.064168 | 2.053621  |
| H  | 1.067464  | 0.712783  | 2.199442  |
| C  | 0.755063  | 1.457872  | -0.688064 |
| H  | 1.108270  | 1.544516  | -1.713651 |
| H  | -0.326790 | 1.332606  | -0.633554 |
| H  | 1.100943  | 2.307641  | -0.102783 |
| C  | 0.748951  | -1.324203 | -0.918648 |
| H  | 1.120793  | -1.257858 | -1.939134 |
| H  | 1.072342  | -2.259306 | -0.465559 |
| H  | -0.331979 | -1.191790 | -0.863583 |
| S  | 1.544169  | -0.002192 | 0.007265  |
| Cl | -2.565732 | 0.001548  | -0.005269 |

SCF energy : -978.107395720

Gibbs free energy: -978.025385

Frequencies

|           |           |           |           |           |           |           |
|-----------|-----------|-----------|-----------|-----------|-----------|-----------|
| 78.7708   | 81.4860   | 101.1909  | 203.7689  | 227.2167  | 234.6869  | 272.2572  |
| 275.5533  | 311.0170  | 652.0566  | 726.9130  | 733.5431  | 911.3167  | 954.2041  |
| 958.0317  | 1053.9182 | 1056.5037 | 1067.0561 | 1323.2010 | 1325.9441 | 1357.0359 |
| 1419.5063 | 1424.5113 | 1432.2134 | 1442.0843 | 1445.1623 | 1445.9429 | 3065.0599 |
| 3067.6883 | 3070.6238 | 3186.1656 | 3188.7951 | 3191.5194 | 3198.1875 | 3206.4797 |
| 3209.3967 |           |           |           |           |           |           |

### S.7.3 Linear ion pair in water

Cartesian coordinates (standard orientation)

|    |           |           |           |
|----|-----------|-----------|-----------|
| C  | -2.144705 | 1.398138  | 0.454116  |
| H  | -1.753681 | 1.306462  | 1.465130  |
| H  | -1.770040 | 2.293182  | -0.038105 |
| H  | -3.232457 | 1.393891  | 0.443488  |
| C  | -2.144929 | -1.398004 | 0.454185  |
| H  | -1.770301 | -2.293126 | -0.037924 |
| H  | -1.753993 | -1.306279 | 1.465228  |
| H  | -3.232680 | -1.393654 | 0.443452  |
| C  | 0.166306  | -0.000133 | -0.265153 |
| H  | 0.564882  | -0.889563 | -0.746626 |
| H  | 0.565009  | 0.889236  | -0.746635 |
| H  | 0.376416  | -0.000140 | 0.801094  |
| S  | -1.610606 | 0.000000  | -0.540974 |
| Cl | 3.677442  | -0.000001 | 0.102799  |

SCF energy : -978.102601172  
Gibbs free energy: -978.021841

#### Frequencies

|           |           |           |           |           |           |           |
|-----------|-----------|-----------|-----------|-----------|-----------|-----------|
| 46.9785   | 62.6934   | 78.2546   | 161.7675  | 210.3503  | 218.6146  | 272.8046  |
| 279.9558  | 310.9473  | 655.8748  | 734.9211  | 741.0256  | 914.3529  | 945.6782  |
| 953.8338  | 1040.1185 | 1060.6273 | 1060.8308 | 1328.4714 | 1336.5255 | 1366.7212 |
| 1415.1318 | 1424.6240 | 1428.4054 | 1434.0341 | 1434.7372 | 1447.8104 | 3092.9525 |
| 3097.1560 | 3111.2979 | 3208.8726 | 3211.3183 | 3212.6410 | 3215.5811 | 3227.8747 |
| 3229.6992 |           |           |           |           |           |           |

### S.7.4 Seesaw ion pair in water

#### Cartesian coordinates (standard orientation)

|    |           |           |           |
|----|-----------|-----------|-----------|
| Cl | 2.795429  | -0.000008 | -0.161385 |
| S  | -0.917769 | 0.000005  | -0.421684 |
| C  | -0.446756 | -1.397136 | 0.604869  |
| C  | -2.708851 | -0.000047 | -0.272016 |
| C  | -0.446800 | 1.397190  | 0.604836  |
| H  | -0.912689 | -1.311928 | 1.584387  |
| H  | -2.996498 | -0.000053 | 0.777002  |
| H  | -0.912899 | 1.312088  | 1.584284  |
| H  | -0.774819 | -2.294240 | 0.083606  |
| H  | -3.067789 | 0.891001  | -0.782901 |
| H  | 0.641773  | 1.357657  | 0.658793  |
| H  | 0.641827  | -1.357679 | 0.658638  |
| H  | -3.067739 | -0.891114 | -0.782904 |
| H  | -0.774708 | 2.294282  | 0.083453  |

SCF energy : -978.106476823  
Gibbs free energy: -978.024488

#### Frequencies

|           |           |           |           |           |           |           |
|-----------|-----------|-----------|-----------|-----------|-----------|-----------|
| 41.6038   | 94.7495   | 113.8530  | 202.4900  | 216.2330  | 249.6362  | 271.1091  |
| 290.4092  | 322.5209  | 657.7309  | 741.3529  | 744.2917  | 910.9168  | 952.0176  |
| 953.8614  | 1055.7819 | 1056.9377 | 1067.0228 | 1321.9955 | 1326.7671 | 1358.1328 |
| 1419.5263 | 1429.2116 | 1430.8976 | 1434.6798 | 1447.0225 | 1455.0825 | 3071.4702 |
| 3073.7156 | 3092.3549 | 3187.2052 | 3189.6721 | 3199.5622 | 3201.6561 | 3207.5086 |
| 3209.9730 |           |           |           |           |           |           |

### S.7.5 Linear transition state in water

#### Cartesian coordinates (standard orientation)

|   |          |          |          |
|---|----------|----------|----------|
| C | 1.630627 | 1.225724 | 1.388862 |
| H | 0.766901 | 1.888285 | 1.335830 |

|    |           |           |           |
|----|-----------|-----------|-----------|
| H  | 1.585002  | 0.626003  | 2.296539  |
| H  | 2.554799  | 1.801733  | 1.377289  |
| C  | 1.630627  | 1.225724  | -1.388862 |
| H  | 1.585002  | 0.626003  | -2.296539 |
| H  | 0.766901  | 1.888285  | -1.335830 |
| H  | 2.554799  | 1.801733  | -1.377289 |
| C  | -0.675332 | -0.561010 | 0.000000  |
| H  | -0.528498 | -1.080905 | -0.929707 |
| H  | -0.528498 | -1.080905 | 0.929707  |
| H  | -0.946837 | 0.479504  | 0.000000  |
| S  | 1.630627  | 0.073852  | 0.000000  |
| Cl | -2.906773 | -1.145529 | 0.000000  |

SCF energy : -978.062405924

Gibbs free energy: -977.983541

#### Frequencies

|           |           |           |           |           |           |           |
|-----------|-----------|-----------|-----------|-----------|-----------|-----------|
| -598.7029 | 71.3143   | 75.5141   | 89.6547   | 162.1988  | 178.4143  | 209.3640  |
| 249.8799  | 257.7851  | 288.2066  | 697.4962  | 748.7668  | 920.3524  | 942.2073  |
| 967.9324  | 997.7047  | 1004.5095 | 1046.6181 | 1056.9610 | 1318.9764 | 1344.3115 |
| 1357.3194 | 1365.6738 | 1428.6413 | 1436.6964 | 1441.7434 | 1447.1570 | 3069.9563 |
| 3070.7128 | 3167.8672 | 3171.5639 | 3171.6519 | 3181.3232 | 3182.1682 | 3374.5519 |
| 3383.4926 |           |           |           |           |           |           |

#### S.7.6 Transition state for a frontside attack

##### Cartesian coordinates (standard orientation)

|    |           |           |           |
|----|-----------|-----------|-----------|
| C  | 1.257235  | -0.658095 | 1.386361  |
| H  | 2.107376  | -1.339159 | 1.344419  |
| H  | 1.310332  | -0.061560 | 2.296036  |
| H  | 0.313680  | -1.200473 | 1.344394  |
| C  | 1.256828  | -0.658503 | -1.386275 |
| H  | 0.313455  | -1.201151 | -1.343591 |
| H  | 1.309199  | -0.062201 | -2.296144 |
| H  | 2.107213  | -1.339281 | -1.344638 |
| C  | -1.054522 | 1.838414  | -0.000128 |
| H  | -2.113519 | 1.665881  | -0.000068 |
| H  | -0.580747 | 2.120319  | 0.926362  |
| H  | -0.580838 | 2.120027  | -0.926773 |
| S  | 1.342329  | 0.488991  | -0.000141 |
| Cl | -2.024745 | -0.685716 | 0.000147  |

SCF energy : -978.013795005

Gibbs free energy: -977.937440

#### Frequencies

|           |           |           |           |           |           |           |
|-----------|-----------|-----------|-----------|-----------|-----------|-----------|
| -431.5468 | 31.6292   | 80.7718   | 111.6569  | 116.9973  | 141.1474  | 162.7692  |
| 209.3373  | 258.3316  | 296.1168  | 665.1265  | 670.8840  | 707.9399  | 757.7844  |
| 922.7695  | 940.6617  | 970.9202  | 1046.9278 | 1114.2616 | 1306.9204 | 1328.4566 |
| 1380.5966 | 1414.2357 | 1424.4217 | 1436.9624 | 1437.9600 | 1445.7289 | 3066.6276 |
| 3067.3409 | 3168.8734 | 3170.7591 | 3180.8257 | 3181.6770 | 3182.3348 | 3367.2056 |
| 3397.2626 |           |           |           |           |           |           |

#### S.7.7 Transition state for an attack from the seesaw ion pair

##### Cartesian coordinates (standard orientation)

|    |           |           |           |
|----|-----------|-----------|-----------|
| Cl | -2.341495 | -0.255508 | -0.216337 |
| S  | 0.907111  | -0.188601 | -0.532591 |
| C  | -0.691864 | 1.597782  | 0.651888  |
| C  | 2.457658  | 0.656764  | -0.170245 |
| C  | 0.940490  | -1.457819 | 0.747696  |
| H  | 0.048521  | 1.344047  | 1.393226  |
| H  | 2.426507  | 1.100447  | 0.827265  |
| H  | 1.057284  | -1.004675 | 1.732706  |
| H  | -0.387617 | 2.183044  | -0.201391 |
| H  | 3.287701  | -0.046278 | -0.236420 |
| H  | -0.012448 | -1.979235 | 0.689018  |
| H  | -1.707459 | 1.692275  | 0.986106  |
| H  | 2.580571  | 1.438499  | -0.918263 |
| H  | 1.760868  | -2.147237 | 0.550904  |

SCF energy : -978.015569838

Gibbs free energy: -977.938748

#### Frequencies

|           |           |           |           |           |           |           |
|-----------|-----------|-----------|-----------|-----------|-----------|-----------|
| -450.3637 | 60.6308   | 81.3637   | 95.5328   | 124.1995  | 140.4380  | 178.4673  |
| 184.8577  | 276.8650  | 304.1966  | 658.7410  | 694.5404  | 709.2761  | 749.7935  |
| 910.2363  | 945.4087  | 972.1773  | 1036.7091 | 1093.5305 | 1316.5696 | 1335.9649 |
| 1384.3861 | 1420.5272 | 1428.5342 | 1437.5375 | 1439.1680 | 1445.6116 | 3058.9616 |
| 3068.2336 | 3152.2929 | 3162.6560 | 3168.6395 | 3178.2389 | 3194.5008 | 3345.2845 |
| 3380.3597 |           |           |           |           |           |           |

#### S.7.8 Immediate product cluster

##### Cartesian coordinates (standard orientation)

|   |           |           |           |
|---|-----------|-----------|-----------|
| C | -1.788909 | 1.421537  | 0.506024  |
| H | -0.913985 | 1.232237  | 1.129801  |
| H | -1.607562 | 2.303823  | -0.107009 |
| H | -2.664093 | 1.592952  | 1.133247  |
| C | -2.352690 | -1.282065 | 0.576005  |
| H | -2.540739 | -2.193061 | 0.008776  |

|    |           |           |           |
|----|-----------|-----------|-----------|
| H  | -1.470087 | -1.424195 | 1.200939  |
| H  | -3.219786 | -1.060986 | 1.199259  |
| C  | 1.622886  | -0.181805 | -0.341708 |
| H  | 1.572204  | -0.878443 | -1.173004 |
| H  | 1.256186  | 0.797478  | -0.633917 |
| H  | 1.073138  | -0.560454 | 0.514891  |
| S  | -2.077713 | 0.041311  | -0.625979 |
| Cl | 3.345319  | -0.012725 | 0.135339  |

SCF energy : -978.096977080

Gibbs free energy: -978.019962

#### Frequencies

|           |           |           |           |           |           |           |
|-----------|-----------|-----------|-----------|-----------|-----------|-----------|
| 49.0210   | 57.9679   | 66.0257   | 74.3909   | 93.7359   | 107.6300  | 186.0817  |
| 196.4710  | 275.5391  | 704.0163  | 724.9299  | 758.2495  | 914.2095  | 954.8969  |
| 986.6001  | 1029.0010 | 1037.0126 | 1046.0114 | 1318.9364 | 1342.2677 | 1356.4985 |
| 1433.0721 | 1442.2275 | 1445.1822 | 1446.6327 | 1450.3607 | 1459.0278 | 3058.3851 |
| 3061.9710 | 3109.1800 | 3144.0719 | 3152.3421 | 3170.0301 | 3172.0868 | 3220.9668 |
| 3224.3485 |           |           |           |           |           |           |

### S.7.9 Asymmetric bifurcated product cluster

#### Cartesian coordinates (standard orientation)

|    |           |           |           |
|----|-----------|-----------|-----------|
| C  | -1.743604 | 1.458042  | -0.062615 |
| H  | -0.731821 | 1.712610  | 0.254613  |
| H  | -2.001585 | 2.039841  | -0.947176 |
| H  | -2.456179 | 1.678816  | 0.732816  |
| C  | -1.392125 | -1.051595 | 1.042947  |
| H  | -1.409074 | -2.130241 | 0.889346  |
| H  | -0.390114 | -0.745748 | 1.346773  |
| H  | -2.115110 | -0.787316 | 1.815204  |
| C  | 2.085180  | -0.909358 | -0.704294 |
| H  | 2.743630  | -0.801370 | -1.560953 |
| H  | 1.043864  | -0.960044 | -1.011974 |
| H  | 2.362410  | -1.773851 | -0.107994 |
| S  | -1.838731 | -0.286443 | -0.533988 |
| Cl | 2.275116  | 0.551051  | 0.322172  |

SCF energy : -978.097787908

Gibbs free energy: -978.020065

#### Frequencies

|          |           |           |           |           |           |           |
|----------|-----------|-----------|-----------|-----------|-----------|-----------|
| 47.0294  | 55.2539   | 73.3986   | 83.3239   | 106.0617  | 134.2684  | 193.0933  |
| 206.9163 | 271.6113  | 698.2262  | 732.2737  | 751.8455  | 911.1563  | 954.6037  |
| 986.1718 | 1030.2305 | 1035.9719 | 1037.0743 | 1315.1213 | 1337.0781 | 1358.4916 |

1432.3808 1440.4088 1446.2819 1449.7899 1452.4860 1459.4662 3061.9789  
3067.3725 3093.8993 3153.2634 3160.6696 3168.4649 3177.5454 3204.0919  
3215.0693

### S.7.10 Symmetric bifurcated product cluster

Cartesian coordinates (standard orientation)

|    |           |           |           |
|----|-----------|-----------|-----------|
| S  | 1.934730  | 0.008034  | 0.593008  |
| C  | 1.502053  | 1.446547  | -0.416499 |
| C  | 1.559590  | -1.315494 | -0.582378 |
| H  | 1.792033  | -2.256410 | -0.084545 |
| H  | 1.700624  | 2.329772  | 0.189789  |
| H  | 0.503164  | -1.302129 | -0.853428 |
| H  | 2.177593  | -1.219379 | -1.475585 |
| H  | 0.445543  | 1.423959  | -0.686387 |
| H  | 2.118673  | 1.482239  | -1.315359 |
| C  | -2.022099 | -0.141895 | 1.140387  |
| H  | -2.492470 | 0.702056  | 1.636386  |
| H  | -0.943218 | -0.125344 | 1.275781  |
| H  | -2.445840 | -1.080658 | 1.484796  |
| Cl | -2.355826 | -0.001036 | -0.618155 |

SCF energy : -978.097785144

Gibbs free energy: -978.020424

Frequencies

|           |           |           |           |           |           |           |
|-----------|-----------|-----------|-----------|-----------|-----------|-----------|
| 50.2262   | 55.4052   | 77.5997   | 88.5874   | 91.3810   | 101.1546  | 185.9721  |
| 193.4593  | 275.2195  | 704.1268  | 723.3725  | 759.2197  | 914.3122  | 957.4452  |
| 988.4886  | 1030.0352 | 1036.4432 | 1040.1050 | 1319.1131 | 1341.1746 | 1362.9730 |
| 1433.7734 | 1441.5406 | 1448.3654 | 1449.5036 | 1454.9402 | 1456.2953 | 3054.7595 |
| 3060.9264 | 3092.3094 | 3144.2935 | 3152.0656 | 3166.7442 | 3176.1099 | 3204.9421 |
| 3214.0604 |           |           |           |           |           |           |

### S.7.11 Single bonded product cluster

Cartesian coordinates (standard orientation)

|    |           |           |           |
|----|-----------|-----------|-----------|
| Cl | -2.636088 | -0.357439 | -0.079480 |
| S  | 1.748157  | -0.220749 | -0.655094 |
| C  | -1.781520 | 1.205440  | 0.139748  |
| C  | 2.405256  | 1.109799  | 0.378688  |
| C  | 1.189132  | -1.355811 | 0.637109  |
| H  | -1.774475 | 1.434920  | 1.201386  |
| H  | 1.618605  | 1.535157  | 1.003728  |
| H  | 0.420597  | -0.888825 | 1.254851  |
| H  | -0.771489 | 1.082732  | -0.244900 |
| H  | 3.220719  | 0.742940  | 1.002631  |

|   |           |           |           |
|---|-----------|-----------|-----------|
| H | 0.763914  | -2.224243 | 0.135057  |
| H | -2.324641 | 1.963098  | -0.417345 |
| H | 2.784566  | 1.878416  | -0.293937 |
| H | 2.027984  | -1.672302 | 1.257930  |

SCF energy : -978.097542685

Gibbs free energy: -978.020057

#### Frequencies

|           |           |           |           |           |           |           |
|-----------|-----------|-----------|-----------|-----------|-----------|-----------|
| 42.4073   | 53.8203   | 57.6086   | 77.6921   | 102.4536  | 153.3299  | 206.2197  |
| 212.9185  | 276.2511  | 702.6299  | 727.2879  | 755.6552  | 913.1048  | 957.3292  |
| 988.3897  | 1027.8024 | 1036.5377 | 1037.8906 | 1318.7729 | 1341.2919 | 1356.3724 |
| 1430.6770 | 1439.8953 | 1445.5826 | 1450.7916 | 1454.3764 | 1462.0804 | 3060.2379 |
| 3065.0572 | 3091.3557 | 3148.0678 | 3158.3109 | 3172.9349 | 3176.2878 | 3203.5046 |
| 3217.0875 |           |           |           |           |           |           |

### S.7.12 (CH<sub>3</sub>)<sub>2</sub>S in water

#### Cartesian coordinates (standard orientation)

|   |           |           |           |
|---|-----------|-----------|-----------|
| C | -1.381425 | 0.510555  | 0.000003  |
| H | -1.356879 | 1.135002  | -0.893912 |
| H | -2.296950 | -0.080323 | -0.000311 |
| H | -1.357253 | 1.134649  | 0.894175  |
| C | 1.381425  | 0.510555  | 0.000003  |
| H | 2.296950  | -0.080323 | -0.000302 |
| H | 1.356884  | 1.134996  | -0.893916 |
| H | 1.357248  | 1.134655  | 0.894170  |
| S | 0.000000  | -0.656583 | 0.000003  |

SCF energy : -477.982250689

Gibbs free energy: -477.933742

#### Frequencies

|           |           |           |           |           |           |           |
|-----------|-----------|-----------|-----------|-----------|-----------|-----------|
| 187.4440  | 202.6068  | 270.7616  | 699.7619  | 750.6891  | 912.6745  | 947.9694  |
| 981.0965  | 1037.0052 | 1313.0872 | 1335.5248 | 1430.9794 | 1440.1721 | 1445.9049 |
| 1450.7273 | 3050.0174 | 3053.4758 | 3135.9257 | 3144.2043 | 3163.8061 | 3165.4251 |

### S.7.13 CH<sub>3</sub>Cl in water

#### Cartesian coordinates (standard orientation)

|    |           |           |           |
|----|-----------|-----------|-----------|
| C  | 0.000000  | 0.000000  | -1.134317 |
| H  | 0.000000  | 1.033087  | -1.468382 |
| H  | 0.894680  | -0.516544 | -1.468382 |
| H  | -0.894680 | -0.516544 | -1.468382 |
| Cl | 0.000000  | 0.000000  | 0.659473  |

SCF energy : -500.112901018

Gibbs free energy: -500.097764

Frequencies

722.5077 1028.6231 1029.4897 1356.2335 1449.6833 1449.8309 3104.1899  
3217.6012 3217.7387

### S.7.14 $\text{CH}_3^+$ in water

Cartesian coordinates (standard orientation)

|   |           |           |           |
|---|-----------|-----------|-----------|
| C | -0.000022 | 0.000006  | -0.000019 |
| H | 0.173027  | 1.071559  | 0.000038  |
| H | 0.841927  | -0.685545 | 0.000038  |
| H | -1.014822 | -0.386049 | 0.000038  |

SCF energy : -39.5704249609

Gibbs free energy: -39.557991

Frequencies

1377.0101 1382.2540 1405.6647 3084.5138 3286.3930 3292.2358

## S.8 Selected cluster geometries in DMSO

### S.8.1 $(\text{CH}_3)_3\text{S}^+$ in DMSO

Cartesian coordinates (input orientation)

|   |           |           |           |
|---|-----------|-----------|-----------|
| C | -3.114028 | -0.037995 | -0.036536 |
| H | -2.693168 | 0.378739  | 0.875840  |
| H | -2.756320 | 0.487984  | -0.919333 |
| H | -4.201587 | -0.031122 | -0.013902 |
| C | -3.114990 | -2.457030 | 1.361719  |
| H | -2.759591 | -3.485272 | 1.374715  |
| H | -2.691279 | -1.877011 | 2.178419  |
| H | -4.202628 | -2.438899 | 1.379553  |
| C | -0.828509 | -1.649150 | -0.033403 |
| H | -0.452993 | -2.670135 | -0.022573 |
| H | -0.455531 | -1.125262 | -0.910848 |
| H | -0.579794 | -1.120808 | 0.884137  |
| S | -2.613355 | -1.754846 | -0.214519 |

SCF energy : -517.693445130

Gibbs free energy: -517.606883

Frequencies

191.3120 199.9932 220.9626 262.8377 278.6239 320.3446 650.3981  
732.6561 736.6032 908.2236 943.9888 946.8580 1043.8850 1050.1227



|           |           |           |           |           |           |           |
|-----------|-----------|-----------|-----------|-----------|-----------|-----------|
| 1060.1231 | 1325.8477 | 1330.7189 | 1357.6449 | 1424.2638 | 1425.4237 | 1426.7685 |
| 1436.5708 | 1440.9819 | 1445.8066 | 3095.5475 | 3096.0860 | 3100.6750 | 3209.0376 |
| 3211.6318 | 3213.3189 | 3214.2200 | 3216.1941 | 3220.1747 |           |           |

### S.8.2 Tripod ion pair in DMSO

Cartesian coordinates (standard orientation)

|    |           |           |           |
|----|-----------|-----------|-----------|
| C  | 0.755521  | 1.537683  | -0.482369 |
| H  | -0.325871 | 1.402763  | -0.449753 |
| H  | 1.096252  | 2.298977  | 0.216828  |
| H  | 1.111401  | 1.767465  | -1.484827 |
| C  | 0.759104  | -1.187097 | -1.089536 |
| H  | 1.109073  | -2.171648 | -0.785287 |
| H  | -0.322478 | -1.087388 | -0.995430 |
| H  | 1.107129  | -0.963155 | -2.096045 |
| C  | 0.735522  | -0.351147 | 1.571086  |
| H  | 1.078151  | -1.334687 | 1.886736  |
| H  | 1.074865  | 0.405348  | 2.276011  |
| H  | -0.344073 | -0.319574 | 1.420518  |
| S  | 1.550334  | -0.000158 | 0.006081  |
| Cl | -2.581804 | 0.000458  | -0.004773 |

SCF energy : -978.106804580

Gibbs free energy: -978.024577

Frequencies

|           |           |           |           |           |           |           |
|-----------|-----------|-----------|-----------|-----------|-----------|-----------|
| 73.9947   | 87.9011   | 92.2911   | 214.4176  | 244.7729  | 255.1577  | 272.5892  |
| 282.2999  | 304.9460  | 653.2901  | 729.5798  | 732.0314  | 908.4241  | 955.9897  |
| 959.9940  | 1056.0917 | 1060.2438 | 1064.6620 | 1322.8157 | 1326.1350 | 1359.2365 |
| 1424.4034 | 1424.8121 | 1430.7408 | 1442.5834 | 1443.4162 | 1448.8859 | 3063.9328 |
| 3069.3989 | 3071.7020 | 3188.1203 | 3190.3512 | 3191.9370 | 3205.7522 | 3210.1045 |
| 3212.4716 |           |           |           |           |           |           |

### S.8.3 Linear ion pair in DMSO

Cartesian coordinates (standard orientation)

|   |           |           |           |
|---|-----------|-----------|-----------|
| C | 2.142140  | -1.397428 | 0.454256  |
| H | 1.751743  | -1.304616 | 1.465426  |
| H | 1.767097  | -2.293037 | -0.036667 |
| H | 3.229908  | -1.393075 | 0.442981  |
| C | 2.141749  | 1.397609  | 0.454173  |
| H | 1.766628  | 2.293100  | -0.036908 |
| H | 1.751187  | 1.304820  | 1.465285  |
| H | 3.229512  | 1.393424  | 0.443074  |
| C | -0.169627 | -0.000111 | -0.265224 |
| H | -0.568175 | 0.889337  | -0.746583 |

|    |           |           |           |
|----|-----------|-----------|-----------|
| H  | -0.568221 | -0.889429 | -0.746783 |
| H  | -0.379518 | -0.000192 | 0.801028  |
| S  | 1.607288  | -0.000016 | -0.541410 |
| Cl | -3.669550 | -0.000029 | 0.103087  |

SCF energy : -978.101693002

Gibbs free energy: -978.021176

Frequencies

|           |           |           |           |           |           |           |
|-----------|-----------|-----------|-----------|-----------|-----------|-----------|
| 37.8288   | 60.7130   | 81.1965   | 152.5006  | 211.1200  | 214.3345  | 278.6162  |
| 282.2588  | 309.8481  | 656.2556  | 734.6939  | 741.1430  | 916.1563  | 945.5339  |
| 951.7825  | 1038.2535 | 1060.3390 | 1065.0115 | 1328.0591 | 1336.4633 | 1367.2792 |
| 1413.7762 | 1424.9150 | 1428.5793 | 1433.7088 | 1435.9888 | 1448.2011 | 3091.4667 |
| 3096.9022 | 3111.9734 | 3207.2267 | 3210.5009 | 3212.5485 | 3215.4036 | 3228.9268 |
| 3230.3783 |           |           |           |           |           |           |

**S.8.4 Linear transition state in DMSO**

Cartesian coordinates (standard orientation)

|    |           |           |           |
|----|-----------|-----------|-----------|
| C  | 1.630691  | 1.222914  | 1.388829  |
| H  | 0.766801  | 1.885289  | 1.335808  |
| H  | 1.585171  | 0.623220  | 2.296544  |
| H  | 2.554778  | 1.799058  | 1.377226  |
| C  | 1.630691  | 1.222914  | -1.388829 |
| H  | 1.585171  | 0.623220  | -2.296544 |
| H  | 0.766801  | 1.885289  | -1.335808 |
| H  | 2.554778  | 1.799058  | -1.377226 |
| C  | -0.673517 | -0.560222 | 0.000000  |
| H  | -0.529008 | -1.080751 | -0.929716 |
| H  | -0.529008 | -1.080751 | 0.929716  |
| H  | -0.944628 | 0.480381  | 0.000000  |
| S  | 1.630691  | 0.071025  | 0.000000  |
| Cl | -2.907594 | -1.140238 | 0.000000  |

SCF energy : -978.062084655

Gibbs free energy: -977.983181

Frequencies

|           |           |           |           |           |           |           |
|-----------|-----------|-----------|-----------|-----------|-----------|-----------|
| -598.0719 | 70.5140   | 78.8111   | 90.4800   | 159.0500  | 179.0890  | 209.9630  |
| 250.3300  | 258.3722  | 289.2155  | 697.5546  | 748.7604  | 920.3519  | 941.9001  |
| 968.3699  | 998.7149  | 1004.3065 | 1046.9564 | 1056.6563 | 1318.9907 | 1344.9359 |
| 1357.6345 | 1365.7743 | 1428.7254 | 1436.2482 | 1441.8874 | 1447.6028 | 3069.9293 |
| 3070.4517 | 3167.8377 | 3171.2737 | 3171.7029 | 3181.3280 | 3182.0825 | 3374.5499 |
| 3383.5410 |           |           |           |           |           |           |

### S.8.5 Immediate product cluster in DMSO

Cartesian coordinates (standard orientation)

|    |           |           |           |
|----|-----------|-----------|-----------|
| C  | -1.790400 | 1.421646  | 0.505836  |
| H  | -0.916585 | 1.232926  | 1.131366  |
| H  | -1.608130 | 2.303725  | -0.107226 |
| H  | -2.666769 | 1.593238  | 1.131372  |
| C  | -2.352119 | -1.282130 | 0.576096  |
| H  | -2.538752 | -2.193519 | 0.009039  |
| H  | -1.470231 | -1.423404 | 1.202271  |
| H  | -3.220201 | -1.061523 | 1.198149  |
| C  | 1.622757  | -0.181528 | -0.341779 |
| H  | 1.570972  | -0.885496 | -1.166800 |
| H  | 1.258684  | 0.795933  | -0.643273 |
| H  | 1.071077  | -0.551055 | 0.517569  |
| S  | -2.076661 | 0.040898  | -0.626100 |
| Cl | 3.345005  | -0.012536 | 0.135542  |

SCF energy : -978.096893870

Gibbs free energy: -978.019401

Frequencies

|           |           |           |           |           |           |           |
|-----------|-----------|-----------|-----------|-----------|-----------|-----------|
| 55.3741   | 62.9423   | 71.2876   | 77.6914   | 99.6651   | 118.2852  | 186.8434  |
| 196.1990  | 275.7459  | 704.0771  | 725.1374  | 758.2977  | 914.2284  | 954.9101  |
| 986.5674  | 1028.9492 | 1037.1437 | 1049.3141 | 1319.0045 | 1342.3064 | 1357.1291 |
| 1433.2399 | 1442.3382 | 1445.8259 | 1447.2528 | 1450.8129 | 1459.8654 | 3058.4067 |
| 3062.0369 | 3108.8173 | 3143.9915 | 3152.3324 | 3169.9689 | 3172.1595 | 3220.8411 |
| 3224.0846 |           |           |           |           |           |           |

### S.8.6 CH<sub>3</sub>Cl in DMSO

Cartesian coordinates (standard orientation)

|    |           |           |           |
|----|-----------|-----------|-----------|
| C  | 0.000000  | 0.000000  | -1.134244 |
| H  | 0.000000  | 1.033224  | -1.468158 |
| H  | 0.894798  | -0.516612 | -1.468158 |
| H  | -0.894798 | -0.516612 | -1.468158 |
| Cl | 0.000000  | 0.000000  | 0.659408  |

SCF energy : -500.112860066

Gibbs free energy: -500.097725

Frequencies

|           |           |           |           |           |           |           |
|-----------|-----------|-----------|-----------|-----------|-----------|-----------|
| 722.8152  | 1029.0067 | 1029.8528 | 1356.4013 | 1449.9706 | 1450.1352 | 3103.3258 |
| 3216.7260 | 3216.8690 |           |           |           |           |           |

### S.8.7 (CH<sub>3</sub>)<sub>2</sub>S in DMSO

Cartesian coordinates (standard orientation)

|   |           |           |           |
|---|-----------|-----------|-----------|
| C | 1.381365  | -0.510568 | 0.000001  |
| H | 1.357096  | -1.134847 | -0.894050 |
| H | 2.296890  | 0.080311  | -0.000013 |
| H | 1.357126  | -1.134846 | 0.894051  |
| C | -1.381365 | -0.510568 | 0.000001  |
| H | -2.296890 | 0.080311  | -0.000030 |
| H | -1.357087 | -1.134858 | -0.894042 |
| H | -1.357135 | -1.134835 | 0.894059  |
| S | 0.000000  | 0.656599  | 0.000001  |

SCF energy : -477.982197688

Gibbs free energy: -477.933684

Frequencies

|           |           |           |           |           |           |           |
|-----------|-----------|-----------|-----------|-----------|-----------|-----------|
| 187.1327  | 203.1311  | 271.1359  | 699.8742  | 750.7765  | 912.6037  | 947.8670  |
| 981.2839  | 1037.1643 | 1313.1275 | 1335.7424 | 1431.1260 | 1440.4762 | 1445.9800 |
| 1450.9620 | 3049.9690 | 3053.3921 | 3135.8133 | 3144.0603 | 3163.7823 | 3165.3814 |

### S.8.8 CH<sub>3</sub><sup>+</sup> in DMSO

Cartesian coordinates (standard orientation)

|   |           |           |           |
|---|-----------|-----------|-----------|
| C | -0.000022 | 0.000006  | -0.000017 |
| H | 0.174320  | 1.071394  | 0.000034  |
| H | 0.841139  | -0.686584 | 0.000034  |
| H | -1.015328 | -0.384848 | 0.000034  |

SCF energy : -39.5694182319

Gibbs free energy: -39.556992

Frequencies

|           |           |           |           |           |           |
|-----------|-----------|-----------|-----------|-----------|-----------|
| 1376.3182 | 1381.6964 | 1405.7846 | 3083.8999 | 3285.7346 | 3291.5752 |
|-----------|-----------|-----------|-----------|-----------|-----------|

## S.9 Selected cluster geometries in nitromethane

### S.9.1 (CH<sub>3</sub>)<sub>3</sub>S<sup>+</sup> in nitromethane

Cartesian coordinates (input orientation)

|   |           |           |           |
|---|-----------|-----------|-----------|
| C | 0.000016  | 1.613305  | 0.266271  |
| H | 0.000134  | 1.493356  | 1.347325  |
| H | 0.891832  | 2.131897  | -0.079318 |
| H | -0.891943 | 2.131786  | -0.079125 |
| C | -1.394890 | -0.806451 | 0.265598  |
| H | -1.393873 | -1.838567 | -0.078317 |
| H | -1.292742 | -0.744428 | 1.346652  |

|   |           |           |           |
|---|-----------|-----------|-----------|
| H | -2.291059 | -0.296487 | -0.080945 |
| C | 1.394860  | -0.806549 | 0.265551  |
| H | 1.395032  | -1.838078 | -0.080112 |
| H | 2.290899  | -0.295243 | -0.079356 |
| H | 1.291732  | -0.746405 | 1.346619  |
| S | 0.000002  | 0.001863  | -0.526884 |

SCF energy : -517.692894402

Gibbs free energy: -517.606327

#### Frequencies

|           |           |           |           |           |           |           |
|-----------|-----------|-----------|-----------|-----------|-----------|-----------|
| 144.1690  | 234.2828  | 235.3471  | 280.4719  | 281.9968  | 319.9110  | 658.0504  |
| 734.8124  | 744.1842  | 903.1613  | 940.4220  | 950.6098  | 1050.6867 | 1051.2025 |
| 1063.0257 | 1328.7310 | 1330.0542 | 1366.7154 | 1414.0043 | 1423.2650 | 1426.6564 |
| 1438.3853 | 1438.9487 | 1450.2112 | 3086.1556 | 3091.9527 | 3099.8984 | 3200.1367 |
| 3207.9957 | 3208.4301 | 3210.9892 | 3213.6827 | 3218.7226 |           |           |

### S.9.2 Tripod ion pair in nitromethane

#### Cartesian coordinates (standard orientation)

|    |           |           |           |
|----|-----------|-----------|-----------|
| C  | -0.750084 | -0.518396 | 1.524861  |
| H  | 0.330893  | -0.470748 | 1.392009  |
| H  | -1.099650 | 0.158535  | 2.302038  |
| H  | -1.095332 | -1.530112 | 1.729491  |
| C  | -0.742100 | -1.061378 | -1.211173 |
| H  | -1.088416 | -0.735284 | -2.190127 |
| H  | 0.338343  | -0.962702 | -1.101796 |
| H  | -1.084517 | -2.075320 | -1.013707 |
| C  | -0.752308 | 1.580411  | -0.313119 |
| H  | -1.096125 | 1.914074  | -1.290334 |
| H  | -1.104039 | 2.262734  | 0.458247  |
| H  | 0.328959  | 1.444402  | -0.281376 |
| S  | -1.547964 | -0.002256 | -0.001752 |
| Cl | 2.576721  | 0.001571  | 0.001186  |

SCF energy : -978.106359667

Gibbs free energy: -978.024043

#### Frequencies

|           |           |           |           |           |           |           |
|-----------|-----------|-----------|-----------|-----------|-----------|-----------|
| 82.0079   | 87.9857   | 95.1182   | 215.7793  | 243.1666  | 257.4803  | 272.9514  |
| 274.8634  | 305.3298  | 653.7688  | 729.1284  | 733.4008  | 908.5602  | 956.5965  |
| 959.8440  | 1056.0223 | 1059.2400 | 1064.9948 | 1323.1942 | 1325.7560 | 1358.2817 |
| 1423.5238 | 1424.1320 | 1431.8450 | 1443.0913 | 1444.1055 | 1447.7519 | 3062.3635 |
| 3069.2643 | 3070.1650 | 3186.1724 | 3190.6296 | 3191.1390 | 3205.2673 | 3207.0932 |
| 3210.8602 |           |           |           |           |           |           |

### S.9.3 Linear ion pair in nitromethane

This calculation was used for the  $\Delta E_{\text{lin}}$  plots, because the calculated value of  $\Delta E_{\text{lin}}$  fitted better into the line of the energy plot. The frequency calculation automatically done after the convergence of the geometry optimization produced no imaginary frequencies (values listed below) whereas as an independent repetition with the geometry stored in the checkpoint file yielded a single imaginary frequency of  $-63 \text{ cm}^{-1}$ .

Cartesian coordinates (standard orientation)

|    |           |           |           |
|----|-----------|-----------|-----------|
| C  | -0.454333 | 2.139841  | 1.397151  |
| H  | -1.465552 | 1.749758  | 1.303437  |
| H  | 0.035791  | 1.764270  | 2.292986  |
| H  | -0.442753 | 3.227616  | 1.393107  |
| C  | -0.454333 | 2.139841  | -1.397151 |
| H  | 0.035791  | 1.764270  | -2.292986 |
| H  | -1.465552 | 1.749758  | -1.303437 |
| H  | -0.442753 | 3.227616  | -1.393107 |
| C  | 0.265485  | -0.171896 | 0.000000  |
| H  | 0.746986  | -0.570349 | -0.889401 |
| H  | 0.746986  | -0.570349 | 0.889401  |
| H  | -0.800747 | -0.381796 | 0.000000  |
| S  | 0.541707  | 1.605058  | 0.000000  |
| Cl | -0.103319 | -3.664025 | 0.000000  |

SCF energy : -978.101063509 (result from opt, used for the plots)

SCF energy : -978.100994348 (after the opt. step of freq. calc.)

Gibbs free energy: -978.019776

Frequencies

|           |           |           |           |           |           |           |
|-----------|-----------|-----------|-----------|-----------|-----------|-----------|
| 26.5424   | 58.5961   | 81.2296   | 146.9904  | 212.0520  | 212.2836  | 282.4236  |
| 282.4646  | 308.8982  | 656.3560  | 734.4983  | 741.1582  | 916.0804  | 944.9650  |
| 949.4143  | 1036.9990 | 1059.6869 | 1064.8735 | 1327.8035 | 1335.5898 | 1365.5163 |
| 1412.8639 | 1425.1143 | 1428.2554 | 1433.5963 | 1435.9962 | 1448.3931 | 3090.5509 |
| 3096.7590 | 3112.2813 | 3206.1863 | 3210.0482 | 3212.4714 | 3215.0947 | 3229.2453 |
| 3230.6073 |           |           |           |           |           |           |

### S.9.4 Linear ion pair in nitromethane

This calculation was used for the  $\Delta G_{\text{lin}}$  plots, because the calculated value of  $\Delta G_{\text{lin}}$  fitted better into the line of the energy plot.

Cartesian coordinates (standard orientation)

|   |          |           |           |
|---|----------|-----------|-----------|
| C | 2.139383 | -1.397107 | 0.454731  |
| H | 1.748281 | -1.303716 | 1.465586  |
| H | 1.764651 | -2.293014 | -0.035891 |
| H | 3.227170 | -1.392660 | 0.444243  |
| C | 2.139113 | 1.397260  | 0.454655  |

|    |           |           |           |
|----|-----------|-----------|-----------|
| H  | 1.764349  | 2.293069  | -0.036122 |
| H  | 1.747855  | 1.303923  | 1.465457  |
| H  | 3.226898  | 1.392919  | 0.444332  |
| C  | -0.172162 | -0.000119 | -0.266656 |
| H  | -0.570275 | 0.889252  | -0.748441 |
| H  | -0.570188 | -0.889525 | -0.748448 |
| H  | -0.382728 | -0.000118 | 0.799433  |
| S  | 1.605080  | -0.000010 | -0.541678 |
| Cl | -3.663253 | -0.000010 | 0.103549  |

SCF energy : -978.101063648

Gibbs free energy: -978.020952

#### Frequencies

|           |           |           |           |           |           |           |
|-----------|-----------|-----------|-----------|-----------|-----------|-----------|
| 27.1967   | 57.9670   | 81.3469   | 147.0651  | 212.1828  | 212.4249  | 282.4575  |
| 282.7932  | 308.9098  | 656.3233  | 734.4172  | 741.1851  | 916.0603  | 945.0150  |
| 948.7756  | 1036.9046 | 1059.5224 | 1064.8197 | 1327.8412 | 1335.4346 | 1365.1838 |
| 1412.9634 | 1425.0529 | 1428.1086 | 1433.6706 | 1436.0738 | 1448.3862 | 3090.5082 |
| 3096.6910 | 3112.5355 | 3206.1242 | 3210.0346 | 3212.3984 | 3215.0108 | 3229.4932 |
| 3230.7374 |           |           |           |           |           |           |

### S.9.5 Linear transition state in nitromethane

#### Cartesian coordinates (standard orientation)

|    |           |           |           |
|----|-----------|-----------|-----------|
| C  | 1.630129  | 1.222856  | 1.388827  |
| H  | 0.765703  | 1.884605  | 1.336602  |
| H  | 1.585790  | 0.623103  | 2.296565  |
| H  | 2.553805  | 1.799642  | 1.376541  |
| C  | 1.630129  | 1.222856  | -1.388827 |
| H  | 1.585790  | 0.623103  | -2.296565 |
| H  | 0.765703  | 1.884605  | -1.336602 |
| H  | 2.553805  | 1.799642  | -1.376541 |
| C  | -0.672223 | -0.559795 | 0.000000  |
| H  | -0.528550 | -1.080644 | -0.929678 |
| H  | -0.528550 | -1.080644 | 0.929678  |
| H  | -0.944166 | 0.480606  | 0.000000  |
| S  | 1.630129  | 0.071032  | 0.000000  |
| Cl | -2.907035 | -1.140355 | 0.000000  |

SCF energy : -978.061861680

Gibbs free energy: -977.982911

#### Frequencies

|           |          |          |          |          |          |          |
|-----------|----------|----------|----------|----------|----------|----------|
| -597.6949 | 70.3065  | 81.7417  | 90.9277  | 157.7091 | 179.5634 | 211.1253 |
| 250.5512  | 258.9545 | 290.0624 | 697.6537 | 748.8352 | 920.2799 | 941.7207 |

|           |           |           |           |           |           |           |
|-----------|-----------|-----------|-----------|-----------|-----------|-----------|
| 968.7902  | 999.3542  | 1004.4275 | 1047.2944 | 1056.5700 | 1318.9897 | 1345.4175 |
| 1357.7809 | 1365.9315 | 1428.8084 | 1436.0051 | 1442.1749 | 1447.8921 | 3069.8383 |
| 3070.2372 | 3167.7032 | 3171.0306 | 3171.6209 | 3181.2846 | 3181.9798 | 3374.4188 |
| 3383.4258 |           |           |           |           |           |           |

### S.9.6 Immediate product cluster in nitromethane

Cartesian coordinates (standard orientation)

|    |           |           |           |
|----|-----------|-----------|-----------|
| C  | -1.858814 | 1.411683  | 0.519780  |
| H  | -0.995497 | 1.245077  | 1.165677  |
| H  | -1.690093 | 2.304751  | -0.081095 |
| H  | -2.755752 | 1.549274  | 1.124153  |
| C  | -2.323756 | -1.310276 | 0.554015  |
| H  | -2.465031 | -2.222576 | -0.024434 |
| H  | -1.451017 | -1.425283 | 1.198247  |
| H  | -3.212432 | -1.126632 | 1.158608  |
| C  | 1.621433  | -0.100172 | -0.304197 |
| H  | 1.529948  | -0.595232 | -1.266020 |
| H  | 1.246579  | 0.917541  | -0.356498 |
| H  | 1.107946  | -0.662009 | 0.470694  |
| S  | -2.069923 | 0.032638  | -0.630296 |
| Cl | 3.362996  | -0.030266 | 0.122225  |

SCF energy : -978.096875273

Gibbs free energy: -978.019743

Frequencies

|           |           |           |           |           |           |           |
|-----------|-----------|-----------|-----------|-----------|-----------|-----------|
| 32.7214   | 59.7387   | 69.9791   | 76.0999   | 111.1032  | 115.9524  | 195.6531  |
| 199.7193  | 276.3835  | 701.8593  | 730.8844  | 754.8497  | 914.3348  | 956.4154  |
| 987.8468  | 1033.7362 | 1037.8268 | 1061.5028 | 1319.7874 | 1342.4846 | 1365.6554 |
| 1433.7841 | 1442.7004 | 1446.2284 | 1447.8588 | 1452.7973 | 1462.2608 | 3060.8116 |
| 3064.0979 | 3104.1578 | 3145.6448 | 3153.6661 | 3171.3050 | 3174.2345 | 3214.3628 |
| 3221.7341 |           |           |           |           |           |           |

### S.9.7 CH<sub>3</sub>Cl in nitromethane

Cartesian coordinates (standard orientation)

|    |           |           |           |
|----|-----------|-----------|-----------|
| C  | 0.000000  | 0.000000  | -1.134427 |
| H  | 0.000000  | 1.033579  | -1.468208 |
| H  | 0.895106  | -0.516790 | -1.468208 |
| H  | -0.895106 | -0.516790 | -1.468208 |
| Cl | 0.000000  | 0.000000  | 0.659482  |

SCF energy : -500.112831464

Gibbs free energy: -500.097710



### Frequencies

722.5983 1029.9065 1030.7381 1356.8949 1450.4274 1450.6045 3100.4498  
3213.7628 3213.9095

### S.9.8 (CH<sub>3</sub>)<sub>2</sub>S in nitromethane

#### Cartesian coordinates (standard orientation)

|   |           |           |           |
|---|-----------|-----------|-----------|
| C | -1.381383 | 0.510807  | 0.000043  |
| H | -1.356638 | 1.135400  | -0.893884 |
| H | -2.297125 | -0.080026 | -0.000781 |
| H | -1.357043 | 1.134650  | 0.894343  |
| C | 1.381388  | 0.510806  | 0.000043  |
| H | 2.297127  | -0.080031 | -0.000847 |
| H | 1.356605  | 1.135440  | -0.893852 |
| H | 1.357077  | 1.134599  | 0.894377  |
| S | -0.000002 | -0.656857 | 0.000008  |

SCF energy : -477.982160959

Gibbs free energy: -477.933633

### Frequencies

188.7089 205.1942 271.6745 699.2727 750.0439 912.8719 947.8883  
981.4864 1037.4424 1313.1251 1335.8767 1431.3677 1440.8471 1446.0415  
1451.1369 3049.5449 3052.9397 3135.6966 3143.9137 3162.7321 3164.3245

### S.9.9 CH<sub>3</sub><sup>+</sup> in nitromethane

#### Cartesian coordinates (standard orientation)

|   |           |           |           |
|---|-----------|-----------|-----------|
| C | -0.000022 | 0.000007  | -0.000016 |
| H | 0.175255  | 1.071272  | 0.000031  |
| H | 0.840568  | -0.687334 | 0.000031  |
| H | -1.015691 | -0.383980 | 0.000031  |

SCF energy : -39.5687158161

Gibbs free energy: -39.556294

### Frequencies

1375.8042 1381.2729 1405.8566 3083.4604 3285.2627 3291.1049

## S.10 Selected cluster geometries in Methanol

### S.10.1 (CH<sub>3</sub>)<sub>3</sub>S<sup>+</sup> in methanol

#### Cartesian coordinates (input orientation)

|   |          |          |           |
|---|----------|----------|-----------|
| C | 0.000051 | 1.613326 | 0.266094  |
| H | 0.000242 | 1.493275 | 1.347140  |
| H | 0.891837 | 2.131956 | -0.079511 |

|   |           |           |           |
|---|-----------|-----------|-----------|
| H | -0.891933 | 2.131833  | -0.079197 |
| C | -1.394706 | -0.806399 | 0.265683  |
| H | -1.393571 | -1.838595 | -0.078007 |
| H | -1.292138 | -0.744160 | 1.346691  |
| H | -2.291060 | -0.296612 | -0.080650 |
| C | 1.394632  | -0.806604 | 0.265519  |
| H | 1.395200  | -1.837924 | -0.080782 |
| H | 2.290789  | -0.294860 | -0.078435 |
| H | 1.290678  | -0.747168 | 1.346554  |
| S | -0.000022 | 0.001931  | -0.527141 |

SCF energy : -517.692606128

Gibbs free energy: -517.606033

#### Frequencies

|           |           |           |           |           |           |           |
|-----------|-----------|-----------|-----------|-----------|-----------|-----------|
| 140.5850  | 236.4559  | 237.3415  | 281.8545  | 282.4221  | 320.5176  | 658.1730  |
| 734.8468  | 744.1300  | 902.9988  | 940.2024  | 951.0602  | 1050.5490 | 1052.0544 |
| 1063.5757 | 1328.5373 | 1330.2631 | 1367.3153 | 1413.4950 | 1423.2931 | 1426.8788 |
| 1438.9008 | 1439.1235 | 1450.6464 | 3085.6885 | 3091.8745 | 3099.8648 | 3199.6116 |
| 3207.9611 | 3208.1702 | 3210.8916 | 3213.6529 | 3218.7099 |           |           |

### S.10.2 Tripod ion pair in methanol

#### Cartesian coordinates (standard orientation)

|    |           |           |           |
|----|-----------|-----------|-----------|
| C  | -0.739046 | 1.560633  | -0.398665 |
| H  | 0.341346  | 1.421114  | -0.348608 |
| H  | -1.072362 | 1.839527  | -1.396436 |
| H  | -1.094690 | 2.287217  | 0.329451  |
| C  | -0.757583 | -0.434707 | 1.551308  |
| H  | -1.107671 | -1.432645 | 1.808643  |
| H  | 0.324356  | -0.397964 | 1.421008  |
| H  | -1.107947 | 0.284626  | 2.288956  |
| C  | -0.737944 | -1.126388 | -1.151169 |
| H  | -1.096443 | -2.124898 | -0.908987 |
| H  | -1.066914 | -0.844452 | -2.149540 |
| H  | 0.342266  | -1.035947 | -1.031459 |
| S  | -1.545314 | 0.001310  | -0.005568 |
| Cl | 2.568854  | -0.000868 | 0.003954  |

SCF energy : -978.106126826

Gibbs free energy: -978.024082

#### Frequencies

|          |          |          |          |          |          |          |
|----------|----------|----------|----------|----------|----------|----------|
| 73.9786  | 82.5075  | 93.9830  | 207.9170 | 242.4781 | 261.8157 | 272.9734 |
| 275.2915 | 306.6727 | 652.3217 | 727.1523 | 731.5597 | 906.8551 | 956.1436 |

|           |           |           |           |           |           |           |
|-----------|-----------|-----------|-----------|-----------|-----------|-----------|
| 959.5612  | 1055.1326 | 1058.9428 | 1065.6737 | 1322.4108 | 1325.3535 | 1358.3971 |
| 1423.2501 | 1424.2663 | 1430.3052 | 1441.9829 | 1445.2794 | 1448.4628 | 3059.5227 |
| 3063.1449 | 3068.4751 | 3182.3583 | 3185.1750 | 3189.3225 | 3200.6934 | 3206.5255 |
| 3209.6512 |           |           |           |           |           |           |

### S.10.3 Linear ion pair in methanol

Cartesian coordinates (standard orientation)

|    |           |           |           |
|----|-----------|-----------|-----------|
| C  | 2.137736  | -1.396969 | 0.454974  |
| H  | 1.746184  | -1.303327 | 1.465638  |
| H  | 1.763204  | -2.293013 | -0.035559 |
| H  | 3.225534  | -1.392488 | 0.444976  |
| C  | 2.137600  | 1.397051  | 0.454934  |
| H  | 1.762895  | 2.293028  | -0.035588 |
| H  | 1.746112  | 1.303348  | 1.465618  |
| H  | 3.225395  | 1.392725  | 0.444867  |
| C  | -0.173609 | -0.000063 | -0.267476 |
| H  | -0.571436 | 0.889313  | -0.749450 |
| H  | -0.571390 | -0.889452 | -0.749463 |
| H  | -0.384634 | -0.000066 | 0.798508  |
| S  | 1.603787  | -0.000007 | -0.541809 |
| Cl | -3.659577 | -0.000005 | 0.103812  |

SCF energy : -978.100717464

Gibbs free energy: -978.021107

Frequencies

|           |           |           |           |           |           |           |
|-----------|-----------|-----------|-----------|-----------|-----------|-----------|
| 17.2883   | 56.3477   | 80.6840   | 144.3452  | 211.2428  | 213.0965  | 281.9999  |
| 284.9424  | 308.3461  | 656.3303  | 734.2978  | 741.1835  | 915.4982  | 944.5603  |
| 946.7689  | 1036.0786 | 1059.0371 | 1063.5203 | 1327.7296 | 1334.4046 | 1363.3959 |
| 1412.5261 | 1425.1306 | 1427.6540 | 1433.6644 | 1435.7661 | 1448.4721 | 3090.0099 |
| 3096.5803 | 3112.7169 | 3205.5555 | 3209.7818 | 3212.3065 | 3214.9608 | 3229.7099 |
| 3230.8975 |           |           |           |           |           |           |

### S.10.4 Linear transition state in methanol

Cartesian coordinates (standard orientation)

|   |           |           |           |
|---|-----------|-----------|-----------|
| C | 1.629996  | 1.222242  | 1.388822  |
| H | 0.765417  | 1.883812  | 1.336782  |
| H | 1.585945  | 0.622479  | 2.296570  |
| H | 2.553563  | 1.799200  | 1.376378  |
| C | 1.629996  | 1.222242  | -1.388822 |
| H | 1.585945  | 0.622479  | -2.296570 |
| H | 0.765417  | 1.883812  | -1.336782 |
| H | 2.553563  | 1.799200  | -1.376378 |
| C | -0.671495 | -0.559518 | 0.000000  |

|    |           |           |           |
|----|-----------|-----------|-----------|
| H  | -0.528540 | -1.080582 | -0.929671 |
| H  | -0.528540 | -1.080582 | 0.929671  |
| H  | -0.943573 | 0.480849  | 0.000000  |
| S  | 1.629996  | 0.070432  | 0.000000  |
| Cl | -2.907066 | -1.139258 | 0.000000  |

SCF energy : -978.061738733

Gibbs free energy: -977.982769

#### Frequencies

|           |           |           |           |           |           |           |
|-----------|-----------|-----------|-----------|-----------|-----------|-----------|
| -597.4603 | 69.9730   | 83.2520   | 91.2371   | 156.7923  | 179.8028  | 211.5028  |
| 250.7174  | 259.2252  | 290.5064  | 697.6868  | 748.8504  | 920.2652  | 941.6298  |
| 968.9818  | 999.7557  | 1004.4169 | 1047.4352 | 1056.5104 | 1318.9998 | 1345.6751 |
| 1357.8930 | 1365.9849 | 1428.8468 | 1435.8691 | 1442.2663 | 1448.0705 | 3069.8132 |
| 3070.1422 | 3167.6657 | 3170.9250 | 3171.6085 | 3181.2758 | 3181.9402 | 3374.3767 |
| 3383.4061 |           |           |           |           |           |           |

### S.10.5 Immediate product cluster in methanol

#### Cartesian coordinates (standard orientation)

|    |           |           |           |
|----|-----------|-----------|-----------|
| C  | -1.858919 | 1.411672  | 0.519759  |
| H  | -0.995631 | 1.245251  | 1.165764  |
| H  | -1.690298 | 2.304772  | -0.081098 |
| H  | -2.755944 | 1.549153  | 1.124033  |
| C  | -2.323647 | -1.310281 | 0.553963  |
| H  | -2.464650 | -2.222630 | -0.024475 |
| H  | -1.451066 | -1.425169 | 1.198442  |
| H  | -3.212515 | -1.126755 | 1.158317  |
| C  | 1.621248  | -0.100055 | -0.303808 |
| H  | 1.529252  | -0.596459 | -1.264886 |
| H  | 1.246745  | 0.917734  | -0.357519 |
| H  | 1.107667  | -0.660562 | 0.472011  |
| S  | -2.069681 | 0.032592  | -0.630354 |
| Cl | 3.362897  | -0.030283 | 0.122094  |

SCF energy : -978.096843931

Gibbs free energy: -978.019654

#### Frequencies

|           |           |           |           |           |           |           |
|-----------|-----------|-----------|-----------|-----------|-----------|-----------|
| 34.4432   | 59.8553   | 70.1887   | 76.2528   | 111.5815  | 115.8243  | 195.6656  |
| 199.6137  | 276.4324  | 701.8900  | 730.9475  | 754.8748  | 914.3236  | 956.4278  |
| 987.8767  | 1033.8930 | 1037.8576 | 1061.3678 | 1319.8243 | 1342.5328 | 1365.6987 |
| 1433.8489 | 1442.7657 | 1446.2693 | 1447.9602 | 1452.8833 | 1462.2631 | 3060.7829 |
| 3064.0586 | 3104.0262 | 3145.5963 | 3153.6064 | 3171.2832 | 3174.2263 | 3214.2633 |
| 3221.5178 |           |           |           |           |           |           |

### S.10.6 CH<sub>3</sub>Cl in methanol

Cartesian coordinates (standard orientation)

|    |           |           |           |
|----|-----------|-----------|-----------|
| C  | 0.000000  | 0.000000  | -1.134388 |
| H  | 0.000000  | 1.033572  | -1.468203 |
| H  | 0.895100  | -0.516786 | -1.468203 |
| H  | -0.895100 | -0.516786 | -1.468203 |
| Cl | 0.000000  | 0.000000  | 0.659467  |

SCF energy : -500.112815913

Gibbs free energy: -500.097694

Frequencies

722.7028 1029.9189 1030.7436 1356.9323 1450.5067 1450.6896 3100.4105  
3213.6971 3213.8453

### S.10.7 (CH<sub>3</sub>)<sub>2</sub>S in methanol

Cartesian coordinates (standard orientation)

|   |           |           |           |
|---|-----------|-----------|-----------|
| C | -1.381355 | 0.510816  | 0.000043  |
| H | -1.356639 | 1.135411  | -0.893889 |
| H | -2.297103 | -0.080009 | -0.000781 |
| H | -1.357046 | 1.134660  | 0.894348  |
| C | 1.381360  | 0.510814  | 0.000043  |
| H | 2.297106  | -0.080015 | -0.000848 |
| H | 1.356605  | 1.135452  | -0.893857 |
| H | 1.357081  | 1.134609  | 0.894383  |
| S | -0.000002 | -0.656868 | 0.000008  |

SCF energy : -477.982140907

Gibbs free energy: -477.933611

Frequencies

188.6431 205.4036 271.8074 699.3144 750.0746 912.8516 947.8599  
981.5591 1037.5016 1313.1437 1335.9566 1431.4260 1440.9602 1446.0740  
1451.2262 3049.5144 3052.8975 3135.6413 3143.8484 3162.7123 3164.2975

### S.10.8 CH<sub>3</sub><sup>+</sup> in methanol

Cartesian coordinates (standard orientation)

|   |           |           |           |
|---|-----------|-----------|-----------|
| C | -0.000022 | 0.000007  | -0.000015 |
| H | 0.175783  | 1.071203  | 0.000030  |
| H | 0.840245  | -0.687757 | 0.000030  |
| H | -1.015895 | -0.383489 | 0.000030  |

SCF energy : -39.5683277672

Gibbs free energy: -39.555909

Frequencies

1375.5091 1381.0274 1405.8923 3083.2136 3284.9977 3290.8418

## S.11 Selected cluster geometries in ethanol

### S.11.1 $(\text{CH}_3)_3\text{S}^+$ in ethanol

Cartesian coordinates (input orientation)

|   |           |           |           |
|---|-----------|-----------|-----------|
| C | -3.113973 | -0.038127 | -0.036430 |
| H | -2.691046 | 0.378714  | 0.874947  |
| H | -2.758554 | 0.487960  | -0.920068 |
| H | -4.201484 | -0.031171 | -0.011380 |
| C | -3.115168 | -2.457061 | 1.361228  |
| H | -2.759392 | -3.485174 | 1.374859  |
| H | -2.692107 | -1.876567 | 2.178010  |
| H | -4.202823 | -2.439668 | 1.378802  |
| C | -0.828382 | -1.649023 | -0.033286 |
| H | -0.452608 | -2.669884 | -0.022297 |
| H | -0.454720 | -1.125290 | -0.910523 |
| H | -0.580239 | -1.120590 | 0.884396  |
| S | -2.613277 | -1.754926 | -0.214990 |

SCF energy : -517.691822000

Gibbs free energy: -517.605210

Frequencies

|           |           |           |           |           |           |           |
|-----------|-----------|-----------|-----------|-----------|-----------|-----------|
| 191.8614  | 202.5247  | 224.4957  | 262.1775  | 279.5058  | 321.6019  | 650.3558  |
| 732.5972  | 736.4471  | 908.2401  | 944.2646  | 947.0550  | 1043.3471 | 1050.8703 |
| 1060.6643 | 1325.8504 | 1330.7525 | 1358.1146 | 1424.3559 | 1425.8268 | 1428.1938 |
| 1436.9432 | 1441.3066 | 1446.5880 | 3095.3484 | 3096.1012 | 3101.0925 | 3208.8099 |
| 3211.9285 | 3213.4607 | 3214.4644 | 3215.6716 | 3220.5681 |           |           |

### S.11.2 Tripod ion pair in ethanol

Cartesian coordinates (standard orientation)

|   |           |           |           |
|---|-----------|-----------|-----------|
| C | 0.735193  | -0.364545 | 1.568954  |
| H | -0.345014 | -0.330016 | 1.422925  |
| H | 1.078131  | -1.350692 | 1.876708  |
| H | 1.079069  | 0.386846  | 2.277183  |
| C | 0.755041  | 1.542093  | -0.469180 |
| H | 1.107570  | 1.777843  | -1.471486 |
| H | -0.326816 | 1.411174  | -0.432313 |
| H | 1.102127  | 2.296664  | 0.234094  |

|    |           |           |           |
|----|-----------|-----------|-----------|
| C  | 0.743613  | -1.177020 | -1.100596 |
| H  | 1.094951  | -0.949752 | -2.105248 |
| H  | 1.084144  | -2.166703 | -0.802353 |
| H  | -0.337360 | -1.067522 | -1.006740 |
| S  | 1.544520  | -0.003650 | 0.003382  |
| Cl | -2.567777 | 0.002788  | -0.002468 |

SCF energy : -978.105457779

Gibbs free energy: -978.023304

#### Frequencies

|           |           |           |           |           |           |           |
|-----------|-----------|-----------|-----------|-----------|-----------|-----------|
| 74.9770   | 87.0435   | 93.6314   | 211.2752  | 242.7212  | 255.5291  | 271.9163  |
| 277.9842  | 304.8135  | 651.9317  | 727.8347  | 731.8792  | 907.8838  | 956.0119  |
| 959.7805  | 1055.0014 | 1059.9469 | 1065.2027 | 1322.0932 | 1325.5797 | 1358.2860 |
| 1424.0905 | 1424.2608 | 1430.6071 | 1442.7422 | 1444.2204 | 1447.8341 | 3060.3314 |
| 3066.6657 | 3069.5884 | 3185.9143 | 3188.3420 | 3190.3440 | 3203.5876 | 3210.0971 |
| 3212.4759 |           |           |           |           |           |           |

### S.11.3 Linear ion pair in ethanol

#### Cartesian coordinates (standard orientation)

|    |           |           |           |
|----|-----------|-----------|-----------|
| C  | -2.128071 | 1.399293  | 0.454605  |
| H  | -1.728623 | 1.308316  | 1.462471  |
| H  | -1.757927 | 2.294493  | -0.040802 |
| H  | -3.215892 | 1.393862  | 0.453054  |
| C  | -2.137680 | -1.393927 | 0.456754  |
| H  | -1.758895 | -2.291396 | -0.027919 |
| H  | -1.752456 | -1.295926 | 1.469417  |
| H  | -3.225452 | -1.390965 | 0.440101  |
| C  | 0.177838  | -0.003949 | -0.269984 |
| H  | 0.573391  | -0.894159 | -0.752188 |
| H  | 0.576509  | 0.884527  | -0.752861 |
| H  | 0.390587  | -0.003584 | 0.795634  |
| S  | -1.599907 | 0.000051  | -0.542086 |
| Cl | 3.648514  | -0.000852 | 0.104601  |

SCF energy : -978.099722650 (result from opt, used for the plots)

SCF energy : -978.099722607 (after the opt. step of freq. calc.)

Gibbs free energy: -978.020618

#### Frequencies

|           |           |           |           |           |           |           |
|-----------|-----------|-----------|-----------|-----------|-----------|-----------|
| 14.1193   | 52.1226   | 75.2850   | 146.7406  | 211.8836  | 214.4079  | 278.4196  |
| 289.5063  | 306.6713  | 656.0917  | 734.0215  | 741.0978  | 911.6791  | 940.3617  |
| 943.2655  | 1033.7942 | 1055.2657 | 1058.0178 | 1327.5687 | 1328.7955 | 1357.2747 |
| 1412.8613 | 1425.2944 | 1425.8202 | 1433.7810 | 1433.9421 | 1448.5428 | 3089.1142 |

3096.2292 3112.8706 3204.5335 3209.0987 3212.0637 3214.4756 3229.9730  
3231.0433

#### S.11.4 Linear transition state in ethanol

Cartesian coordinates (standard orientation)

|    |           |           |           |
|----|-----------|-----------|-----------|
| C  | 1.629668  | 1.221073  | 1.388778  |
| H  | 0.764729  | 1.882227  | 1.337183  |
| H  | 1.586303  | 0.621318  | 2.296572  |
| H  | 2.552989  | 1.798404  | 1.375940  |
| C  | 1.629668  | 1.221073  | -1.388778 |
| H  | 1.586303  | 0.621318  | -2.296572 |
| H  | 0.764729  | 1.882227  | -1.337183 |
| H  | 2.552989  | 1.798404  | -1.375940 |
| C  | -0.669764 | -0.558747 | 0.000000  |
| H  | -0.528455 | -1.080309 | -0.929648 |
| H  | -0.528455 | -1.080309 | 0.929648  |
| H  | -0.942568 | 0.481428  | 0.000000  |
| S  | 1.629668  | 0.069284  | 0.000000  |
| Cl | -2.907099 | -1.137273 | 0.000000  |

SCF energy : -978.061384544

Gibbs free energy: -977.982370

Frequencies

|           |           |           |           |           |           |           |
|-----------|-----------|-----------|-----------|-----------|-----------|-----------|
| -596.6292 | 69.1660   | 86.5541   | 92.1107   | 154.6318  | 180.3660  | 212.6435  |
| 251.0614  | 259.9962  | 291.6253  | 697.8173  | 748.9353  | 920.1934  | 941.3771  |
| 969.3988  | 1000.6791 | 1004.2623 | 1047.7766 | 1056.3045 | 1319.0118 | 1346.3328 |
| 1358.1506 | 1366.1494 | 1428.9661 | 1435.5651 | 1442.5512 | 1448.5828 | 3069.7784 |
| 3069.9242 | 3167.6059 | 3170.6798 | 3171.6166 | 3181.2848 | 3181.8702 | 3374.3359 |
| 3383.3594 |           |           |           |           |           |           |

#### S.11.5 Immediate product cluster in ethanol

Cartesian coordinates (standard orientation)

|   |           |           |           |
|---|-----------|-----------|-----------|
| C | -1.859434 | 1.411628  | 0.519775  |
| H | -0.995961 | 1.245969  | 1.165774  |
| H | -1.691562 | 2.304872  | -0.081082 |
| H | -2.756523 | 1.548543  | 1.124099  |
| C | -2.322870 | -1.310371 | 0.554047  |
| H | -2.463257 | -2.222861 | -0.024322 |
| H | -1.450453 | -1.424864 | 1.198850  |
| H | -3.212035 | -1.127299 | 1.158115  |
| C | 1.621107  | -0.099900 | -0.304263 |
| H | 1.529313  | -0.596088 | -1.265475 |
| H | 1.246461  | 0.917857  | -0.357947 |



|    |           |           |           |
|----|-----------|-----------|-----------|
| H  | 1.107152  | -0.660567 | 0.471215  |
| S  | -2.069240 | 0.032440  | -0.630365 |
| Cl | 3.362464  | -0.030162 | 0.122309  |

SCF energy : -978.096754266

Gibbs free energy: -978.019512

Frequencies

|           |           |           |           |           |           |           |
|-----------|-----------|-----------|-----------|-----------|-----------|-----------|
| 35.6203   | 60.1434   | 70.3211   | 76.6364   | 111.7752  | 116.0061  | 195.8863  |
| 199.6650  | 276.5493  | 702.0129  | 731.3422  | 754.9761  | 914.2731  | 956.4537  |
| 987.9755  | 1033.8764 | 1037.9126 | 1061.4020 | 1319.9266 | 1342.6651 | 1365.8130 |
| 1434.0293 | 1442.9508 | 1446.4727 | 1448.1926 | 1453.1379 | 1462.4446 | 3060.7062 |
| 3063.9617 | 3103.9661 | 3145.4359 | 3153.4243 | 3171.2576 | 3174.2009 | 3214.1803 |
| 3221.3211 |           |           |           |           |           |           |

**S.11.6 CH<sub>3</sub>Cl in ethanol**

Cartesian coordinates (standard orientation)

|    |           |           |           |
|----|-----------|-----------|-----------|
| C  | 0.000000  | 0.000000  | -1.134276 |
| H  | 0.000000  | 1.033553  | -1.468190 |
| H  | 0.895083  | -0.516776 | -1.468190 |
| H  | -0.895083 | -0.516776 | -1.468190 |
| Cl | 0.000000  | 0.000000  | 0.659425  |

SCF energy : -500.112771264

Gibbs free energy: -500.097648

Frequencies

|           |           |           |           |           |           |           |
|-----------|-----------|-----------|-----------|-----------|-----------|-----------|
| 723.0030  | 1029.9539 | 1030.7590 | 1357.0392 | 1450.7337 | 1450.9326 | 3100.2981 |
| 3213.5084 | 3213.6609 |           |           |           |           |           |

**S.11.7 (CH<sub>3</sub>)<sub>2</sub>S in ethanol**

Cartesian coordinates (standard orientation)

|   |           |           |           |
|---|-----------|-----------|-----------|
| C | -1.381271 | 0.510840  | 0.000043  |
| H | -1.356640 | 1.135441  | -0.893903 |
| H | -2.297041 | -0.079960 | -0.000782 |
| H | -1.357052 | 1.134691  | 0.894363  |
| C | 1.381276  | 0.510839  | 0.000043  |
| H | 2.297044  | -0.079965 | -0.000851 |
| H | 1.356605  | 1.135485  | -0.893870 |
| H | 1.357088  | 1.134638  | 0.894399  |
| S | -0.000002 | -0.656900 | 0.000008  |

SCF energy : -477.982083502

Gibbs free energy: -477.933549

### Frequencies

|           |           |           |           |           |           |           |
|-----------|-----------|-----------|-----------|-----------|-----------|-----------|
| 188.4715  | 205.9662  | 272.1672  | 699.4342  | 750.1634  | 912.7939  | 947.7819  |
| 981.7587  | 1037.6629 | 1313.1977 | 1336.1765 | 1431.5929 | 1441.2754 | 1446.1710 |
| 1451.4803 | 3049.4266 | 3052.7788 | 3135.4823 | 3143.6636 | 3162.6556 | 3164.2209 |

### S.11.8 CH<sub>3</sub><sup>+</sup> in ethanol

#### Cartesian coordinates (standard orientation)

|   |           |           |           |
|---|-----------|-----------|-----------|
| C | -0.000022 | 0.000008  | -0.000013 |
| H | 0.177354  | 1.070994  | 0.000025  |
| H | 0.839279  | -0.689015 | 0.000025  |
| H | -1.016501 | -0.382027 | 0.000025  |

SCF energy : -39.5672056981

Gibbs free energy: -39.554796

### Frequencies

|           |           |           |           |           |           |
|-----------|-----------|-----------|-----------|-----------|-----------|
| 1374.6117 | 1380.2749 | 1405.9795 | 3082.4841 | 3284.2137 | 3290.0677 |
|-----------|-----------|-----------|-----------|-----------|-----------|

## S.12 Selected cluster geometries in acetone

### S.12.1 (CH<sub>3</sub>)<sub>3</sub>S<sup>+</sup> in acetone

#### Cartesian coordinates (input orientation)

|   |           |           |           |
|---|-----------|-----------|-----------|
| C | 0.000284  | 1.613412  | 0.265295  |
| H | 0.000841  | 1.492935  | 1.346309  |
| H | 0.891952  | 2.132149  | -0.080429 |
| H | -0.891786 | 2.132108  | -0.079499 |
| C | -1.393972 | -0.806041 | 0.266313  |
| H | -1.391663 | -1.838987 | -0.075214 |
| H | -1.290059 | -0.741629 | 1.347099  |
| H | -2.291244 | -0.297850 | -0.080021 |
| C | 1.393590  | -0.806973 | 0.265140  |
| H | 1.396525  | -1.837010 | -0.085030 |
| H | 2.290151  | -0.292541 | -0.073768 |
| H | 1.285623  | -0.751791 | 1.346043  |
| S | -0.000241 | 0.002215  | -0.528278 |

SCF energy : -517.691029681

Gibbs free energy: -517.604417

### Frequencies

|           |           |           |           |           |           |           |
|-----------|-----------|-----------|-----------|-----------|-----------|-----------|
| 125.3765  | 242.1978  | 251.9820  | 282.8875  | 289.6466  | 324.0154  | 658.6699  |
| 734.9814  | 743.8330  | 902.2566  | 939.2689  | 953.2029  | 1049.6869 | 1056.5027 |
| 1066.1950 | 1327.7044 | 1331.2427 | 1370.4127 | 1411.4442 | 1423.4881 | 1427.9030 |

1439.9352 1441.7402 1453.0902 3083.5188 3091.4640 3099.6980 3197.1304  
3206.8952 3207.7741 3210.4225 3213.4708 3218.6707

### S.12.2 Tripod ion pair in acetone

Cartesian coordinates (standard orientation)

|    |           |           |           |
|----|-----------|-----------|-----------|
| C  | 0.737774  | 1.595018  | -0.231935 |
| H  | -0.342931 | 1.451119  | -0.206110 |
| H  | 1.087059  | 2.238971  | 0.573107  |
| H  | 1.078728  | 1.980772  | -1.190554 |
| C  | 0.739182  | -0.999629 | -1.264112 |
| H  | 1.089543  | -2.020105 | -1.120731 |
| H  | -0.341587 | -0.913779 | -1.145505 |
| H  | 1.079023  | -0.621409 | -2.226433 |
| C  | 0.750181  | -0.596723 | 1.497348  |
| H  | 1.098538  | -1.616739 | 1.648198  |
| H  | 1.099572  | 0.038777  | 2.308728  |
| H  | -0.331485 | -0.544905 | 1.369039  |
| S  | 1.542256  | 0.002089  | -0.003413 |
| Cl | -2.562081 | -0.001066 | 0.002180  |

SCF energy : -978.104789575

Gibbs free energy: -978.023187

Frequencies

|           |           |           |           |           |           |           |
|-----------|-----------|-----------|-----------|-----------|-----------|-----------|
| 71.7576   | 81.5323   | 101.7824  | 193.4348  | 212.2613  | 241.7103  | 262.7629  |
| 267.7001  | 305.6989  | 649.5688  | 724.7790  | 731.0320  | 908.9970  | 951.2775  |
| 956.7375  | 1048.8489 | 1055.3132 | 1066.0227 | 1321.5899 | 1323.9626 | 1353.6607 |
| 1419.1743 | 1424.1299 | 1431.7577 | 1441.1553 | 1444.1816 | 1445.6235 | 3058.3566 |
| 3064.0070 | 3067.7159 | 3179.6038 | 3185.9487 | 3189.1339 | 3199.5072 | 3200.5191 |
| 3207.1367 |           |           |           |           |           |           |

### S.12.3 Linear ion pair in acetone

Cartesian coordinates (standard orientation)

|   |           |           |           |
|---|-----------|-----------|-----------|
| C | -2.117635 | 1.400776  | 0.455368  |
| H | -1.709888 | 1.312532  | 1.460172  |
| H | -1.752351 | 2.295253  | -0.044951 |
| H | -3.205406 | 1.394355  | 0.462783  |
| C | -2.133514 | -1.392248 | 0.459749  |
| H | -1.754505 | -2.290736 | -0.022869 |
| H | -1.748525 | -1.292336 | 1.472318  |
| H | -3.221327 | -1.389517 | 0.442887  |
| C | 0.183064  | -0.006913 | -0.276597 |
| H | 0.575547  | -0.898075 | -0.759483 |
| H | 0.581003  | 0.880514  | -0.761964 |

|    |           |           |           |
|----|-----------|-----------|-----------|
| H  | 0.400478  | -0.005463 | 0.788055  |
| S  | -1.595842 | -0.000366 | -0.542083 |
| Cl | 3.633938  | -0.000609 | 0.106192  |

SCF energy : -978.098842540

Gibbs free energy: -978.019252

#### Frequencies

|           |           |           |           |           |           |           |
|-----------|-----------|-----------|-----------|-----------|-----------|-----------|
| 22.5936   | 55.2166   | 68.3520   | 155.8102  | 213.0121  | 217.0791  | 273.7567  |
| 292.2737  | 305.6038  | 655.8340  | 733.8640  | 741.1508  | 906.0136  | 933.4266  |
| 942.5359  | 1031.7636 | 1047.0712 | 1056.7265 | 1318.9166 | 1328.4188 | 1353.3467 |
| 1414.3127 | 1423.6926 | 1425.5275 | 1432.1680 | 1434.4800 | 1448.5233 | 3088.5871 |
| 3095.6675 | 3113.1526 | 3203.9354 | 3208.3686 | 3211.6455 | 3214.0205 | 3230.1857 |
| 3231.0055 |           |           |           |           |           |           |

### S.12.4 Linear transition state in acetone

#### Cartesian coordinates (standard orientation)

|    |           |           |           |
|----|-----------|-----------|-----------|
| C  | 1.629484  | 1.219041  | 1.388769  |
| H  | 0.764396  | 1.880021  | 1.337196  |
| H  | 1.586208  | 0.619285  | 2.296580  |
| H  | 2.552732  | 1.796491  | 1.375933  |
| C  | 1.629484  | 1.219041  | -1.388769 |
| H  | 1.586208  | 0.619285  | -2.296580 |
| H  | 0.764396  | 1.880021  | -1.337196 |
| H  | 2.552732  | 1.796491  | -1.375933 |
| C  | -0.667947 | -0.558167 | 0.000000  |
| H  | -0.528588 | -1.080234 | -0.929667 |
| H  | -0.528588 | -1.080234 | 0.929667  |
| H  | -0.940937 | 0.481955  | 0.000000  |
| S  | 1.629484  | 0.067264  | 0.000000  |
| Cl | -2.907437 | -1.133459 | 0.000000  |

SCF energy : -978.061069343

Gibbs free energy: -977.982047

#### Frequencies

|           |           |           |           |           |           |           |
|-----------|-----------|-----------|-----------|-----------|-----------|-----------|
| -595.9766 | 68.2098   | 87.7688   | 92.7174   | 152.4610  | 180.8683  | 213.1022  |
| 251.2972  | 260.6480  | 292.4957  | 697.8627  | 748.9362  | 920.1557  | 941.1018  |
| 969.7902  | 1001.5259 | 1004.1268 | 1047.9610 | 1056.1257 | 1319.0083 | 1346.8376 |
| 1358.2446 | 1366.2112 | 1429.0406 | 1435.2790 | 1442.6769 | 1449.0306 | 3069.7265 |
| 3069.7436 | 3167.5481 | 3170.4697 | 3171.5928 | 3181.2823 | 3181.7992 | 3374.2207 |
| 3383.3075 |           |           |           |           |           |           |

### S.12.5 Immediate product cluster in acetone

Cartesian coordinates (standard orientation)

|    |           |           |           |
|----|-----------|-----------|-----------|
| C  | -1.796276 | 1.425549  | 0.500139  |
| H  | -0.921805 | 1.242013  | 1.126294  |
| H  | -1.616640 | 2.305377  | -0.116897 |
| H  | -2.672930 | 1.597814  | 1.125218  |
| C  | -2.350276 | -1.278585 | 0.583504  |
| H  | -2.538035 | -2.192660 | 0.021151  |
| H  | -1.466583 | -1.416795 | 1.207971  |
| H  | -3.216803 | -1.055860 | 1.206986  |
| C  | 1.631464  | -0.202468 | -0.353473 |
| H  | 1.593610  | -0.945450 | -1.144332 |
| H  | 1.268857  | 0.757321  | -0.707954 |
| H  | 1.068578  | -0.532700 | 0.514774  |
| S  | -2.079497 | 0.039010  | -0.625462 |
| Cl | 3.344955  | -0.002953 | 0.140774  |

SCF energy : -978.096627370

Gibbs free energy: -978.018573

Frequencies

|           |           |           |           |           |           |           |
|-----------|-----------|-----------|-----------|-----------|-----------|-----------|
| 58.2813   | 69.2365   | 77.6403   | 89.1574   | 105.6901  | 139.7885  | 187.2226  |
| 193.4666  | 276.2112  | 704.4479  | 724.1902  | 758.8242  | 913.8500  | 955.2376  |
| 987.0593  | 1030.3280 | 1037.1647 | 1054.8921 | 1319.3602 | 1342.5996 | 1359.5137 |
| 1433.5792 | 1442.4536 | 1446.1373 | 1449.7518 | 1451.5173 | 1461.1787 | 3058.1800 |
| 3061.8814 | 3103.9788 | 3143.3406 | 3151.7999 | 3170.0627 | 3172.2334 | 3216.0197 |
| 3220.9617 |           |           |           |           |           |           |

### S.12.6 CH<sub>3</sub>Cl in acetone

Cartesian coordinates (standard orientation)

|    |           |           |           |
|----|-----------|-----------|-----------|
| C  | 0.000000  | 0.000000  | -1.134176 |
| H  | 0.000000  | 1.033535  | -1.468178 |
| H  | 0.895068  | -0.516768 | -1.468178 |
| H  | -0.895068 | -0.516768 | -1.468178 |
| Cl | 0.000000  | 0.000000  | 0.659388  |

SCF energy : -500.112731749

Gibbs free energy: -500.097608

Frequencies

|           |           |           |           |           |           |           |
|-----------|-----------|-----------|-----------|-----------|-----------|-----------|
| 723.2691  | 1029.9842 | 1030.7724 | 1357.1334 | 1450.9338 | 1451.1461 | 3100.1988 |
| 3213.3415 | 3213.4976 |           |           |           |           |           |

### S.12.7 (CH<sub>3</sub>)<sub>2</sub>S in acetone

Cartesian coordinates (standard orientation)

|   |           |           |           |
|---|-----------|-----------|-----------|
| C | -1.381196 | 0.510862  | 0.000043  |
| H | -1.356639 | 1.135468  | -0.893917 |
| H | -2.296986 | -0.079915 | -0.000781 |
| H | -1.357053 | 1.134720  | 0.894375  |
| C | 1.381201  | 0.510860  | 0.000043  |
| H | 2.296989  | -0.079920 | -0.000853 |
| H | 1.356602  | 1.135513  | -0.893882 |
| H | 1.357091  | 1.134665  | 0.894412  |
| S | -0.000002 | -0.656929 | 0.000008  |

SCF energy : -477.982032899

Gibbs free energy: -477.933494

Frequencies

|           |           |           |           |           |           |           |
|-----------|-----------|-----------|-----------|-----------|-----------|-----------|
| 188.3398  | 206.4191  | 272.4605  | 699.5404  | 750.2429  | 912.7437  | 947.7169  |
| 981.9246  | 1037.7957 | 1313.2462 | 1336.3605 | 1431.7398 | 1441.5432 | 1446.2612 |
| 1451.7024 | 3049.3486 | 3052.6763 | 3135.3411 | 3143.5030 | 3162.6056 | 3164.1542 |

### S.12.8 CH<sub>3</sub><sup>+</sup> in acetone

Cartesian coordinates (standard orientation)

|   |           |           |           |
|---|-----------|-----------|-----------|
| C | -0.000022 | 0.000009  | -0.000011 |
| H | 0.178817  | 1.070795  | 0.000022  |
| H | 0.838377  | -0.690184 | 0.000022  |
| H | -1.017061 | -0.380663 | 0.000022  |

SCF energy : -39.5662026546

Gibbs free energy: -39.553801

Frequencies

|           |           |           |           |           |           |
|-----------|-----------|-----------|-----------|-----------|-----------|
| 1374.0047 | 1379.6287 | 1406.0416 | 3081.8124 | 3283.4929 | 3289.3597 |
|-----------|-----------|-----------|-----------|-----------|-----------|

## S.13 Selected cluster geometries in dichloro ethane

### S.13.1 (CH<sub>3</sub>)<sub>3</sub>S<sup>+</sup> in dichloro ethane

Cartesian coordinates (input orientation)

|   |           |           |           |
|---|-----------|-----------|-----------|
| C | -3.113521 | -0.037883 | -0.036715 |
| H | -2.688009 | 0.378106  | 0.873931  |
| H | -2.759653 | 0.488518  | -0.920872 |
| H | -4.201076 | -0.028754 | -0.009595 |
| C | -3.115387 | -2.457412 | 1.360880  |
| H | -2.757661 | -3.484987 | 1.376040  |
| H | -2.693633 | -1.875205 | 2.177258  |

|   |           |           |           |
|---|-----------|-----------|-----------|
| H | -4.203150 | -2.442990 | 1.379001  |
| C | -0.829070 | -1.649099 | -0.033278 |
| H | -0.452613 | -2.669748 | -0.021853 |
| H | -0.453679 | -1.125754 | -0.910126 |
| H | -0.582199 | -1.120360 | 0.884636  |
| S | -2.614123 | -1.755237 | -0.216039 |

SCF energy : -517.686795993

Gibbs free energy: -517.600084

#### Frequencies

|           |           |           |           |           |           |           |
|-----------|-----------|-----------|-----------|-----------|-----------|-----------|
| 188.8042  | 210.6307  | 231.2214  | 262.5651  | 283.8505  | 324.9881  | 649.7383  |
| 731.6575  | 735.8260  | 907.9232  | 944.7563  | 947.6701  | 1042.1772 | 1052.2691 |
| 1062.1877 | 1325.7233 | 1330.8939 | 1359.1977 | 1424.4728 | 1427.0177 | 1431.2344 |
| 1437.8504 | 1443.1491 | 1448.8635 | 3094.1219 | 3095.8079 | 3101.5178 | 3207.4934 |
| 3211.7516 | 3212.7946 | 3214.1431 | 3214.5374 | 3221.3641 |           |           |

### S.13.2 Tripod ion pair in dichloro ethane

#### Cartesian coordinates (standard orientation)

|    |           |           |           |
|----|-----------|-----------|-----------|
| C  | -0.715651 | 1.428374  | -0.745028 |
| H  | 0.364274  | 1.299062  | -0.657174 |
| H  | -1.042095 | 1.472742  | -1.782395 |
| H  | -1.072771 | 2.302694  | -0.204059 |
| C  | -0.751741 | -0.067475 | 1.610380  |
| H  | -1.105581 | -0.980226 | 2.086248  |
| H  | 0.331354  | -0.062368 | 1.480072  |
| H  | -1.105117 | 0.801517  | 2.162347  |
| C  | -0.721035 | -1.361464 | -0.861619 |
| H  | -1.075693 | -2.276233 | -0.390015 |
| H  | -1.054273 | -1.323010 | -1.897094 |
| H  | 0.359505  | -1.240373 | -0.769338 |
| S  | -1.529776 | 0.001973  | -0.010649 |
| Cl | 2.529846  | -0.001294 | 0.007023  |

SCF energy : -978.101487015

Gibbs free energy: -978.019279

#### Frequencies

|           |           |           |           |           |           |           |
|-----------|-----------|-----------|-----------|-----------|-----------|-----------|
| 82.9861   | 94.6153   | 113.9460  | 201.9936  | 221.5968  | 240.1977  | 268.1253  |
| 277.4384  | 314.1614  | 650.8369  | 725.2585  | 736.9823  | 906.5490  | 956.5172  |
| 957.6020  | 1054.0317 | 1054.5994 | 1069.9474 | 1320.5950 | 1324.1064 | 1357.2654 |
| 1417.4431 | 1422.4883 | 1434.3475 | 1441.3363 | 1447.7142 | 1451.8502 | 3055.8152 |
| 3056.5493 | 3066.3114 | 3178.9019 | 3180.0171 | 3188.0678 | 3199.9097 | 3201.2753 |
| 3202.9794 |           |           |           |           |           |           |

### S.13.3 Linear ion pair in dichloro ethane

Cartesian coordinates (standard orientation)

|    |           |           |           |
|----|-----------|-----------|-----------|
| C  | 2.122292  | -1.389770 | 0.457619  |
| H  | 1.747300  | -1.284501 | 1.473443  |
| H  | 1.736065  | -2.289787 | -0.016570 |
| H  | 3.210008  | -1.389595 | 0.430118  |
| C  | 2.102213  | 1.400420  | 0.452239  |
| H  | 1.733284  | 2.295386  | -0.044685 |
| H  | 1.698194  | 1.309965  | 1.458452  |
| H  | 3.190060  | 1.395390  | 0.455700  |
| C  | -0.201022 | -0.008478 | -0.269481 |
| H  | -0.602265 | 0.877787  | -0.753885 |
| H  | -0.595471 | -0.899833 | -0.750008 |
| H  | -0.415110 | -0.006173 | 0.795819  |
| S  | 1.576785  | -0.000471 | -0.543607 |
| Cl | -3.592443 | -0.000831 | 0.106298  |

SCF energy : -978.093834367

Gibbs free energy: -978.014412

Frequencies

|           |           |           |           |           |           |           |
|-----------|-----------|-----------|-----------|-----------|-----------|-----------|
| 11.8290   | 57.3245   | 95.6698   | 150.9360  | 220.2102  | 223.1878  | 273.9883  |
| 302.4933  | 303.5638  | 657.0779  | 733.1505  | 741.0075  | 906.7771  | 933.8458  |
| 940.5956  | 1030.4369 | 1047.7818 | 1057.3398 | 1319.1771 | 1327.6549 | 1353.1566 |
| 1413.9477 | 1424.4775 | 1427.0981 | 1431.2122 | 1435.7995 | 1450.6178 | 3086.0092 |
| 3094.9384 | 3115.3046 | 3200.6724 | 3206.8630 | 3210.9191 | 3213.2578 | 3233.0864 |
| 3233.6506 |           |           |           |           |           |           |

### S.13.4 Linear transition state in dichloro acetone

Cartesian coordinates (standard orientation)

|    |           |           |           |
|----|-----------|-----------|-----------|
| C  | 1.989734  | -1.389693 | 0.460679  |
| H  | 1.479002  | -1.340040 | 1.422579  |
| H  | 1.700886  | -2.296764 | -0.067884 |
| H  | 3.069562  | -1.377801 | 0.600825  |
| C  | 1.984639  | 1.391449  | 0.460053  |
| H  | 1.695300  | 2.297626  | -0.069808 |
| H  | 1.471210  | 1.340696  | 1.420059  |
| H  | 3.064043  | 1.381723  | 0.603379  |
| C  | -0.827034 | -0.001159 | -0.231960 |
| H  | -0.918245 | 0.913622  | -0.789714 |
| H  | -0.910400 | -0.946186 | -0.738776 |
| H  | -0.675557 | 0.029611  | 0.832985  |
| S  | 1.511752  | 0.000146  | -0.587466 |
| Cl | -3.120463 | -0.000495 | 0.120775  |



SCF energy : -978.059205857 (result from the optimisation)  
SCF energy : -978.059206101 (single point calc, used fro the plot)  
Gibbs free energy: -977.981253

#### Frequencies

|           |           |           |           |           |           |           |
|-----------|-----------|-----------|-----------|-----------|-----------|-----------|
| -593.2042 | 33.4914   | 56.6575   | 79.0002   | 154.6092  | 179.4315  | 240.5032  |
| 247.9439  | 261.2312  | 299.8355  | 701.9738  | 753.6512  | 914.5030  | 941.2447  |
| 966.9524  | 996.3059  | 1001.3378 | 1042.2031 | 1050.2554 | 1318.9891 | 1349.3160 |
| 1356.3747 | 1361.6052 | 1431.9841 | 1436.7758 | 1449.6666 | 1453.1213 | 3070.0497 |
| 3072.1863 | 3170.1767 | 3171.1387 | 3173.3945 | 3187.0541 | 3187.8519 | 3376.8600 |
| 3381.3547 |           |           |           |           |           |           |

### S.13.5 Immediate product cluster in dichloro acetone

#### Cartesian coordinates (standard orientation)

|    |           |           |           |
|----|-----------|-----------|-----------|
| C  | -1.862711 | 1.411213  | 0.519993  |
| H  | -0.998755 | 1.249648  | 1.166566  |
| H  | -1.698472 | 2.305273  | -0.080688 |
| H  | -2.760600 | 1.544980  | 1.123932  |
| C  | -2.318688 | -1.311033 | 0.554208  |
| H  | -2.455180 | -2.224274 | -0.023935 |
| H  | -1.447549 | -1.423300 | 1.201311  |
| H  | -3.209878 | -1.130718 | 1.156207  |
| C  | 1.620246  | -0.098080 | -0.306260 |
| H  | 1.528779  | -0.593787 | -1.267777 |
| H  | 1.245755  | 0.919746  | -0.360525 |
| H  | 1.103919  | -0.658616 | 0.467828  |
| S  | -2.066484 | 0.031576  | -0.630474 |
| Cl | 3.360156  | -0.029809 | 0.123355  |

SCF energy : -978.096232934  
Gibbs free energy: -978.018867

#### Frequencies

|           |           |           |           |           |           |           |
|-----------|-----------|-----------|-----------|-----------|-----------|-----------|
| 38.2781   | 61.2778   | 70.7910   | 77.9931   | 111.9360  | 115.9530  | 196.6127  |
| 199.0751  | 276.8694  | 702.7984  | 733.5123  | 755.6485  | 913.9500  | 956.4182  |
| 988.3044  | 1033.6822 | 1038.1164 | 1059.8754 | 1320.4294 | 1343.2751 | 1365.8791 |
| 1435.0335 | 1443.9197 | 1447.3790 | 1449.4123 | 1454.4743 | 1463.2093 | 3060.2956 |
| 3063.4357 | 3103.7253 | 3144.5897 | 3152.4753 | 3171.0811 | 3173.9939 | 3213.6406 |
| 3220.5375 |           |           |           |           |           |           |

### S.13.6 CH<sub>3</sub>Cl in dichloro ethane

Cartesian coordinates (standard orientation)

|    |           |           |           |
|----|-----------|-----------|-----------|
| C  | 0.000000  | 0.000000  | -1.133611 |
| H  | 0.000000  | 1.033435  | -1.468114 |
| H  | 0.894981  | -0.516717 | -1.468114 |
| H  | -0.894981 | -0.516717 | -1.468114 |
| Cl | 0.000000  | 0.000000  | 0.659177  |

SCF energy : -500.112508191

Gibbs free energy: -500.097378

Frequencies

724.7825 1030.1435 1030.8434 1357.6591 1452.0514 1452.3277 3099.6405  
3212.3984 3212.5732

### S.13.7 (CH<sub>3</sub>)<sub>2</sub>S in dichloro ethane

Cartesian coordinates (standard orientation)

|   |           |           |           |
|---|-----------|-----------|-----------|
| C | -1.380757 | 0.510988  | 0.000043  |
| H | -1.356605 | 1.135612  | -0.893997 |
| H | -2.296666 | -0.079646 | -0.000762 |
| H | -1.357021 | 1.134903  | 0.894428  |
| C | 1.380763  | 0.510986  | 0.000043  |
| H | 2.296669  | -0.079651 | -0.000843 |
| H | 1.356563  | 1.135664  | -0.893957 |
| H | 1.357064  | 1.134841  | 0.894470  |
| S | -0.000002 | -0.657098 | 0.000009  |

SCF energy : -477.981750038

Gibbs free energy: -477.933190

Frequencies

187.8836 208.3080 273.7384 700.1408 750.7041 912.4722 947.4076  
982.6969 1038.3978 1313.5288 1337.2390 1432.5554 1442.8884 1446.8316  
1452.9144 3048.9046 3052.1356 3134.5355 3142.6386 3162.3246 3163.7933

### S.13.8 CH<sub>3</sub><sup>+</sup> in dichloro ethane

Cartesian coordinates (standard orientation)

|   |           |           |           |
|---|-----------|-----------|-----------|
| C | -0.000022 | 0.000013  | -0.000001 |
| H | 0.188472  | 1.069398  | 0.000002  |
| H | 0.832341  | -0.697858 | 0.000002  |
| H | -1.020680 | -0.371619 | 0.000002  |

SCF energy : -39.5603450655

Gibbs free energy: -39.547983

Frequencies

1371.4633 1376.8537 1406.7159 3077.7214 3279.0856 3285.1748

## S.14 Selected cluster geometries in pentanal

### S.14.1 $(\text{CH}_3)_3\text{S}^+$ in pentanal

Cartesian coordinates (input orientation)

|   |           |           |           |
|---|-----------|-----------|-----------|
| C | 0.001628  | 1.613409  | 0.264355  |
| H | 0.003618  | 1.492416  | 1.345353  |
| H | 0.893062  | 2.131926  | -0.082259 |
| H | -0.890584 | 2.132911  | -0.078975 |
| C | -1.393928 | -0.804086 | 0.268904  |
| H | -1.384558 | -1.841395 | -0.059301 |
| H | -1.293127 | -0.726034 | 1.349153  |
| H | -2.293047 | -0.304944 | -0.085908 |
| C | 1.391832  | -0.808944 | 0.262735  |
| H | 1.404096  | -1.833529 | -0.103096 |
| H | 2.287837  | -0.283581 | -0.060793 |
| H | 1.274475  | -0.770643 | 1.343485  |
| S | -0.001304 | 0.002492  | -0.529695 |

SCF energy : -517.686593486

Gibbs free energy: -517.599781

Frequencies

130.4760 253.3379 262.2743 284.0640 295.8950 332.6419 658.2519  
734.8830 743.1960 901.6584 939.2333 953.9324 1046.0827 1061.9897  
1069.1078 1327.5705 1331.4641 1372.3164 1412.3445 1424.2820 1429.4669  
1441.7570 1445.8175 1457.6532 3079.8341 3090.7319 3099.2285 3192.7697  
3204.4368 3206.9039 3210.1578 3212.7699 3218.6542

### S.14.2 Tripod ion pair in pentanal

Cartesian coordinates (standard orientation)

|   |           |           |           |
|---|-----------|-----------|-----------|
| C | 0.734706  | -0.261856 | 1.590925  |
| H | -0.347187 | -0.249255 | 1.449991  |
| H | 1.092612  | -1.221596 | 1.959514  |
| H | 1.074635  | 0.537754  | 2.246576  |
| C | 0.715874  | 1.508233  | -0.569337 |
| H | 1.064701  | 1.687412  | -1.584673 |
| H | -0.364361 | 1.362269  | -0.521317 |
| H | 1.053046  | 2.309383  | 0.085915  |

|    |           |           |           |
|----|-----------|-----------|-----------|
| C  | 0.737643  | -1.249130 | -1.020690 |
| H  | 1.078859  | -1.082868 | -2.040622 |
| H  | 1.095894  | -2.212176 | -0.661490 |
| H  | -0.344390 | -1.148689 | -0.924434 |
| S  | 1.528231  | 0.006569  | -0.001922 |
| Cl | -2.528520 | -0.004166 | 0.000936  |

SCF energy : -978.101384430

Gibbs free energy: -978.019187

#### Frequencies

|           |           |           |           |           |           |           |
|-----------|-----------|-----------|-----------|-----------|-----------|-----------|
| 81.3202   | 99.1199   | 109.6053  | 208.9851  | 221.6855  | 253.4544  | 261.7840  |
| 275.2913  | 309.7557  | 649.4856  | 724.4722  | 730.9723  | 908.0438  | 953.0219  |
| 959.4698  | 1049.8904 | 1058.2431 | 1068.2614 | 1320.9869 | 1323.4814 | 1355.2094 |
| 1419.8518 | 1424.0255 | 1434.7583 | 1443.5905 | 1446.3810 | 1449.0465 | 3053.5278 |
| 3060.4327 | 3063.1030 | 3176.8636 | 3182.9390 | 3185.5603 | 3198.1869 | 3198.5947 |
| 3203.7054 |           |           |           |           |           |           |

### S.14.3 Linear ion pair in pentanal

#### Cartesian coordinates (standard orientation)

|    |           |           |           |
|----|-----------|-----------|-----------|
| C  | 2.124548  | -1.388531 | 0.458276  |
| H  | 1.753204  | -1.281774 | 1.475272  |
| H  | 1.736199  | -2.289026 | -0.013296 |
| H  | 3.212192  | -1.389085 | 0.426891  |
| C  | 2.099262  | 1.401997  | 0.451466  |
| H  | 1.732090  | 2.296059  | -0.048387 |
| H  | 1.691966  | 1.313572  | 1.456557  |
| H  | 3.187075  | 1.396871  | 0.458464  |
| C  | -0.201300 | -0.010792 | -0.269563 |
| H  | -0.603363 | 0.874821  | -0.754478 |
| H  | -0.594714 | -0.902758 | -0.749802 |
| H  | -0.415589 | -0.008007 | 0.795685  |
| S  | 1.576549  | -0.000585 | -0.543466 |
| Cl | -3.591700 | -0.001022 | 0.106322  |

SCF energy : -978.093713491

Gibbs free energy: -978.013000

#### Frequencies

|          |           |           |           |           |           |           |
|----------|-----------|-----------|-----------|-----------|-----------|-----------|
| 40.7114  | 57.7793   | 95.6689   | 168.1169  | 219.3859  | 226.8390  | 273.8633  |
| 300.0512 | 302.4623  | 656.7408  | 733.0330  | 741.1497  | 907.0869  | 933.9222  |
| 941.3146 | 1030.4371 | 1047.9518 | 1056.2642 | 1318.8831 | 1328.3505 | 1352.6662 |

1416.3427 1424.4020 1427.2429 1431.4015 1436.3073 1449.7284 3086.8400  
3094.8642 3115.3266 3201.6695 3206.9112 3210.8703 3213.1193 3233.0644  
3233.7627

#### S.14.4 Linear transition state in pentanal

Cartesian coordinates (standard orientation)

|    |           |           |           |
|----|-----------|-----------|-----------|
| C  | 1.626975  | 1.211363  | 1.388715  |
| H  | 0.759938  | 1.870052  | 1.339450  |
| H  | 1.587247  | 0.611461  | 2.296634  |
| H  | 2.548862  | 1.790937  | 1.374024  |
| C  | 1.626975  | 1.211363  | -1.388715 |
| H  | 1.587247  | 0.611461  | -2.296634 |
| H  | 0.759938  | 1.870052  | -1.339450 |
| H  | 2.548862  | 1.790937  | -1.374024 |
| C  | -0.656971 | -0.554149 | 0.000000  |
| H  | -0.527955 | -1.079317 | -0.929463 |
| H  | -0.527955 | -1.079317 | 0.929463  |
| H  | -0.933304 | 0.485151  | 0.000000  |
| S  | 1.626975  | 0.059825  | 0.000000  |
| Cl | -2.906844 | -1.120005 | 0.000000  |

SCF energy : -978.059213205

Gibbs free energy: -977.980067

Frequencies

-591.6858 64.8038 94.5401 97.0253 144.9735 183.4445 217.8220  
252.6343 264.6337 298.2937 698.2824 749.1948 919.7773 940.1210  
972.2910 1003.6936 1006.8676 1048.6544 1056.3941 1319.1809 1350.1241  
1358.4352 1366.7166 1429.5973 1434.3165 1443.9446 1451.7130 3068.8343  
3069.3868 3166.9930 3169.5170 3171.1256 3181.1991 3181.4255 3373.2345  
3382.6188

#### S.14.5 Immediate product cluster in pentanal

Cartesian coordinates (standard orientation)

|   |           |           |           |
|---|-----------|-----------|-----------|
| C | -1.862664 | 1.411169  | 0.520068  |
| H | -0.998660 | 1.249622  | 1.166593  |
| H | -1.698488 | 2.305253  | -0.080595 |
| H | -2.760515 | 1.544915  | 1.124070  |
| C | -2.318607 | -1.311064 | 0.554229  |
| H | -2.455206 | -2.224275 | -0.023934 |
| H | -1.447405 | -1.423409 | 1.201235  |
| H | -3.209723 | -1.130744 | 1.156337  |
| C | 1.620308  | -0.097869 | -0.306727 |
| H | 1.529211  | -0.592158 | -1.269011 |

|    |           |           |           |
|----|-----------|-----------|-----------|
| H  | 1.245626  | 0.919960  | -0.359599 |
| H  | 1.103847  | -0.659641 | 0.466365  |
| S  | -2.066484 | 0.031572  | -0.630433 |
| Cl | 3.360049  | -0.029888 | 0.123532  |

SCF energy : -978.096222433

Gibbs free energy: -978.018877

#### Frequencies

|           |           |           |           |           |           |           |
|-----------|-----------|-----------|-----------|-----------|-----------|-----------|
| 37.6239   | 61.2942   | 70.6976   | 77.9652   | 111.4160  | 116.0480  | 196.6753  |
| 199.1715  | 276.8620  | 702.8066  | 733.6144  | 755.6530  | 913.9405  | 956.4082  |
| 988.3066  | 1033.5895 | 1038.1160 | 1059.7857 | 1320.4337 | 1343.2808 | 1365.8529 |
| 1435.0526 | 1443.9399 | 1447.4148 | 1449.4121 | 1454.4890 | 1463.2544 | 3060.2764 |
| 3063.4152 | 3103.7689 | 3144.5570 | 3152.4393 | 3171.0702 | 3173.9894 | 3213.6712 |
| 3220.5606 |           |           |           |           |           |           |

#### S.14.6 CH<sub>3</sub>Cl in pentanal

##### Cartesian coordinates (standard orientation)

|    |           |           |           |
|----|-----------|-----------|-----------|
| C  | 0.000000  | 0.000000  | -1.133598 |
| H  | 0.000000  | 1.033432  | -1.468113 |
| H  | 0.894979  | -0.516716 | -1.468113 |
| H  | -0.894979 | -0.516716 | -1.468113 |
| Cl | 0.000000  | 0.000000  | 0.659172  |

SCF energy : -500.112502817

Gibbs free energy: -500.097373

#### Frequencies

|           |           |           |           |           |           |           |
|-----------|-----------|-----------|-----------|-----------|-----------|-----------|
| 724.8190  | 1030.1471 | 1030.8450 | 1357.6716 | 1452.0779 | 1452.3556 | 3099.6272 |
| 3212.3757 | 3212.5510 |           |           |           |           |           |

#### S.14.7 (CH<sub>3</sub>)<sub>2</sub>S in pentanal

##### Cartesian coordinates (standard orientation)

|   |           |           |           |
|---|-----------|-----------|-----------|
| C | -1.380747 | 0.510991  | 0.000043  |
| H | -1.356604 | 1.135616  | -0.893999 |
| H | -2.296658 | -0.079639 | -0.000761 |
| H | -1.357019 | 1.134908  | 0.894429  |
| C | 1.380752  | 0.510989  | 0.000043  |
| H | 2.296661  | -0.079645 | -0.000843 |
| H | 1.356562  | 1.135668  | -0.893959 |
| H | 1.357062  | 1.134845  | 0.894471  |
| S | -0.000002 | -0.657102 | 0.000009  |

SCF energy : -477.981743308

Gibbs free energy: -477.933183

Frequencies

|           |           |           |           |           |           |           |
|-----------|-----------|-----------|-----------|-----------|-----------|-----------|
| 187.8776  | 208.3412  | 273.7622  | 700.1552  | 750.7153  | 912.4659  | 947.4011  |
| 982.7123  | 1038.4095 | 1313.5357 | 1337.2572 | 1432.5747 | 1442.9177 | 1446.8463 |
| 1452.9427 | 3048.8938 | 3052.1233 | 3134.5160 | 3142.6186 | 3162.3179 | 3163.7850 |

### S.14.8 $\text{CH}_3^+$ in pentanal

Cartesian coordinates (standard orientation)

|   |           |           |           |
|---|-----------|-----------|-----------|
| C | -0.000022 | 0.000013  | -0.000001 |
| H | 0.188736  | 1.069357  | 0.000002  |
| H | 0.832174  | -0.698067 | 0.000002  |
| H | -1.020777 | -0.371371 | 0.000002  |

SCF energy : -39.5602003121

Gibbs free energy: -39.547840

Frequencies

|           |           |           |           |           |           |
|-----------|-----------|-----------|-----------|-----------|-----------|
| 1371.3944 | 1376.8036 | 1406.7249 | 3077.6132 | 3278.9676 | 3285.0678 |
|-----------|-----------|-----------|-----------|-----------|-----------|

## S.15 Selected cluster geometries in acetic acid

### S.15.1 $(\text{CH}_3)_3\text{S}^+$ in acetic acid

Cartesian coordinates (input orientation)

|   |           |           |           |
|---|-----------|-----------|-----------|
| C | 0.002759  | 1.612834  | 0.263690  |
| H | 0.005479  | 1.492102  | 1.344773  |
| H | 0.894316  | 2.130762  | -0.083535 |
| H | -0.889168 | 2.133289  | -0.079099 |
| C | -1.395157 | -0.802622 | 0.271095  |
| H | -1.381440 | -1.843371 | -0.046171 |
| H | -1.298613 | -0.713678 | 1.350950  |
| H | -2.294847 | -0.310002 | -0.091675 |
| C | 1.391598  | -0.810277 | 0.260952  |
| H | 1.413221  | -1.830159 | -0.117612 |
| H | 2.285928  | -0.274866 | -0.050971 |
| H | 1.268194  | -0.785714 | 1.341532  |
| S | -0.002270 | 0.001700  | -0.529970 |

SCF energy : -517.681421877

Gibbs free energy: -517.594613

### Frequencies

|           |           |           |           |           |           |           |
|-----------|-----------|-----------|-----------|-----------|-----------|-----------|
| 148.8139  | 235.3716  | 255.9336  | 282.4132  | 299.1375  | 339.3489  | 655.8658  |
| 734.3759  | 742.5717  | 901.9543  | 940.9438  | 949.1599  | 1039.7581 | 1060.0025 |
| 1069.3122 | 1328.6411 | 1329.1358 | 1366.0242 | 1415.3786 | 1424.7753 | 1430.1196 |
| 1441.2540 | 1448.0557 | 1459.4283 | 3077.3693 | 3089.9554 | 3098.6792 | 3189.9206 |
| 3202.3606 | 3204.9621 | 3210.8026 | 3211.9147 | 3218.6612 |           |           |

### S.15.2 Tripod ion pair in acetic acid

#### Cartesian coordinates (standard orientation)

|    |           |           |           |
|----|-----------|-----------|-----------|
| C  | 0.694456  | -0.493271 | 1.533533  |
| H  | -0.385054 | -0.459611 | 1.372540  |
| H  | 1.048626  | -1.496788 | 1.763659  |
| H  | 1.019542  | 0.201858  | 2.305438  |
| C  | 0.713338  | 1.576568  | -0.342969 |
| H  | 1.077858  | 1.900746  | -1.316076 |
| H  | -0.367677 | 1.425444  | -0.332613 |
| H  | 1.040041  | 2.273590  | 0.426680  |
| C  | 0.745615  | -1.086406 | -1.193164 |
| H  | 1.117609  | -0.785991 | -2.170960 |
| H  | 1.085257  | -2.094097 | -0.960223 |
| H  | -0.338140 | -0.986583 | -1.112339 |
| S  | 1.516762  | 0.005961  | 0.012263  |
| Cl | -2.499218 | -0.003252 | -0.009219 |

SCF energy : -978.097729897

Gibbs free energy: -978.014978

### Frequencies

|           |           |           |           |           |           |           |
|-----------|-----------|-----------|-----------|-----------|-----------|-----------|
| 91.0995   | 98.8366   | 114.9043  | 221.0818  | 246.2085  | 260.7906  | 273.1830  |
| 276.5141  | 312.0458  | 649.7742  | 726.7661  | 729.8319  | 909.3659  | 956.7478  |
| 961.8238  | 1056.5711 | 1059.8774 | 1070.4330 | 1320.6491 | 1324.5487 | 1358.4370 |
| 1422.8158 | 1423.9045 | 1435.0308 | 1445.8818 | 1449.3853 | 1451.0860 | 3054.7499 |
| 3055.7169 | 3059.6931 | 3182.5549 | 3183.6479 | 3184.7750 | 3203.6835 | 3208.4739 |
| 3212.6658 |           |           |           |           |           |           |

### S.15.3 Linear ion pair in acetic acid

#### Cartesian coordinates (standard orientation)

|   |          |           |           |
|---|----------|-----------|-----------|
| C | 2.117468 | -1.354706 | 0.501782  |
| H | 1.678772 | -1.263350 | 1.493257  |
| H | 1.801993 | -2.274893 | 0.014292  |
| H | 3.203935 | -1.305806 | 0.538654  |
| C | 1.986123 | 1.434941  | 0.454506  |
| H | 1.594492 | 2.305622  | -0.067722 |
| H | 1.548282 | 1.338703  | 1.445985  |



|    |           |           |           |
|----|-----------|-----------|-----------|
| H  | 3.071981  | 1.483603  | 0.498593  |
| C  | -0.225130 | -0.078768 | -0.347401 |
| H  | -0.645551 | 0.782208  | -0.860502 |
| H  | -0.559150 | -0.992520 | -0.832127 |
| H  | -0.490069 | -0.070827 | 0.706130  |
| S  | 1.563243  | -0.000280 | -0.542171 |
| Cl | -3.499255 | -0.000415 | 0.122638  |

SCF energy : -978.088054508

Gibbs free energy: -978.007100

#### Frequencies

|           |           |           |           |           |           |           |
|-----------|-----------|-----------|-----------|-----------|-----------|-----------|
| 57.2919   | 57.6775   | 94.9027   | 183.5697  | 200.0052  | 235.2899  | 267.1094  |
| 287.1464  | 315.8405  | 648.9160  | 726.2881  | 745.0985  | 899.7450  | 930.8340  |
| 946.0704  | 1039.6794 | 1043.6183 | 1048.4947 | 1304.3017 | 1330.9398 | 1352.7003 |
| 1416.3393 | 1418.6670 | 1424.4234 | 1437.9149 | 1439.0892 | 1444.8311 | 3089.9775 |
| 3093.4491 | 3109.9161 | 3204.7856 | 3206.3593 | 3208.7230 | 3216.2194 | 3225.8213 |
| 3229.2035 |           |           |           |           |           |           |

#### S.15.4 Linear transition state in acetic acid

##### Cartesian coordinates (standard orientation)

|    |           |           |           |
|----|-----------|-----------|-----------|
| C  | 1.623835  | 1.204645  | 1.388599  |
| H  | 0.755508  | 1.861806  | 1.340645  |
| H  | 1.586148  | 0.604715  | 2.296628  |
| H  | 2.544927  | 1.785448  | 1.372937  |
| C  | 1.623835  | 1.204645  | -1.388599 |
| H  | 1.586148  | 0.604715  | -2.296628 |
| H  | 0.755508  | 1.861806  | -1.340645 |
| H  | 2.544927  | 1.785448  | -1.372937 |
| C  | -0.644730 | -0.550148 | 0.000000  |
| H  | -0.526636 | -1.078434 | -0.929218 |
| H  | -0.526636 | -1.078434 | 0.929218  |
| H  | -0.926816 | 0.487685  | 0.000000  |
| S  | 1.623835  | 0.053289  | 0.000000  |
| Cl | -2.905417 | -1.108366 | 0.000000  |

SCF energy : -978.057099733

Gibbs free energy: -977.977748

#### Frequencies

|           |           |           |           |           |           |           |
|-----------|-----------|-----------|-----------|-----------|-----------|-----------|
| -585.3700 | 64.3807   | 99.8672   | 102.9230  | 143.4319  | 185.4827  | 223.3385  |
| 254.4350  | 268.7577  | 303.1958  | 698.6665  | 749.5271  | 919.3598  | 940.0723  |
| 974.2765  | 1002.7951 | 1012.5138 | 1048.5084 | 1057.8043 | 1319.7325 | 1353.0712 |
| 1358.7423 | 1366.9150 | 1430.4441 | 1434.3844 | 1445.5950 | 1454.2651 | 3068.3977 |

3069.2133 3166.5507 3169.1035 3170.7515 3181.2264 3181.2592 3372.1794  
3381.4250

### S.15.5 Immediate product cluster in acetic acid

Cartesian coordinates (standard orientation)

|    |           |           |           |
|----|-----------|-----------|-----------|
| C  | -1.796149 | 1.421756  | 0.504971  |
| H  | -0.921949 | 1.241043  | 1.132781  |
| H  | -1.619336 | 2.304835  | -0.108333 |
| H  | -2.674757 | 1.589152  | 1.128698  |
| C  | -2.344641 | -1.282044 | 0.577949  |
| H  | -2.521887 | -2.196356 | 0.012552  |
| H  | -1.466009 | -1.416937 | 1.210503  |
| H  | -3.218300 | -1.066447 | 1.194123  |
| C  | 1.621561  | -0.181845 | -0.346371 |
| H  | 1.572240  | -0.885317 | -1.172056 |
| H  | 1.255643  | 0.794439  | -0.649729 |
| H  | 1.065316  | -0.552556 | 0.509739  |
| S  | -2.070828 | 0.038757  | -0.626506 |
| Cl | 3.339863  | -0.010539 | 0.138031  |

SCF energy : -978.095694896

Gibbs free energy: -978.018026

Frequencies

|           |           |           |           |           |           |           |
|-----------|-----------|-----------|-----------|-----------|-----------|-----------|
| 55.0445   | 64.3589   | 73.8941   | 80.6599   | 102.3504  | 115.6031  | 189.3865  |
| 197.6800  | 277.1661  | 705.0970  | 728.2852  | 758.9998  | 913.7031  | 954.9581  |
| 987.8726  | 1029.5728 | 1037.9358 | 1052.8115 | 1320.3896 | 1344.0961 | 1360.6773 |
| 1435.5204 | 1444.5753 | 1447.6861 | 1450.5591 | 1454.4906 | 1462.6999 | 3057.5586 |
| 3061.2144 | 3108.4624 | 3142.0210 | 3150.4783 | 3169.6161 | 3172.3540 | 3219.6395 |
| 3222.6413 |           |           |           |           |           |           |

### S.15.6 CH<sub>3</sub>Cl in acetic acid

Cartesian coordinates (standard orientation)

|    |           |           |           |
|----|-----------|-----------|-----------|
| C  | 0.000000  | 0.000000  | -1.132957 |
| H  | 0.000000  | 1.033315  | -1.468051 |
| H  | 0.894877  | -0.516658 | -1.468051 |
| H  | -0.894877 | -0.516658 | -1.468051 |
| Cl | 0.000000  | 0.000000  | 0.658935  |

SCF energy : -500.112250092

Gibbs free energy: -500.097114

Frequencies

726.5480 1030.3028 1030.9145 1358.2517 1453.3115 1453.6387 3099.0050  
3211.3125 3211.5042

**S.15.7 (CH<sub>3</sub>)<sub>2</sub>S in acetic acid**

Cartesian coordinates (standard orientation)

|   |           |           |           |
|---|-----------|-----------|-----------|
| C | -1.380239 | 0.511135  | 0.000044  |
| H | -1.356539 | 1.135768  | -0.894096 |
| H | -2.296288 | -0.079324 | -0.000713 |
| H | -1.356924 | 1.135147  | 0.894465  |
| C | 1.380244  | 0.511133  | 0.000044  |
| H | 2.296291  | -0.079330 | -0.000801 |
| H | 1.356493  | 1.135824  | -0.894053 |
| H | 1.356970  | 1.135080  | 0.894511  |
| S | -0.000002 | -0.657299 | 0.000010  |

SCF energy : -477.981430345

Gibbs free energy: -477.932854

Frequencies

187.7863 209.3910 274.5841 700.8251 751.2476 912.1805 947.1359  
983.3051 1038.8497 1313.8644 1337.9872 1433.4656 1444.1617 1447.5797  
1454.2305 3048.3880 3051.5715 3133.5971 3141.7094 3162.0014 3163.4005

**S.15.8 CH<sub>3</sub><sup>+</sup> in acetic acid**

Cartesian coordinates (standard orientation)

|   |           |           |           |
|---|-----------|-----------|-----------|
| C | 0.000022  | 0.000020  | -0.000008 |
| H | -0.203120 | 1.067031  | 0.000016  |
| H | -0.822961 | -0.709378 | 0.000016  |
| H | 1.025951  | -0.357771 | 0.000016  |

SCF energy : -39.5531728474

Gibbs free energy: -39.540862

Frequencies

1369.9181 1374.3957 1406.3065 3071.9811 3272.4669 3280.0950

**S.16 Selected cluster geometries in 1-bromooctane**

**S.16.1 (CH<sub>3</sub>)<sub>3</sub>S<sup>+</sup> in 1-bromooctane**

Cartesian coordinates (input orientation)

|   |          |          |           |
|---|----------|----------|-----------|
| C | 0.003280 | 1.612391 | 0.263305  |
| H | 0.006322 | 1.492040 | 1.344471  |
| H | 0.894876 | 2.130058 | -0.084279 |

|   |           |           |           |
|---|-----------|-----------|-----------|
| H | -0.888485 | 2.133302  | -0.079333 |
| C | -1.396098 | -0.801951 | 0.272169  |
| H | -1.381297 | -1.844169 | -0.040379 |
| H | -1.301658 | -0.708392 | 1.351857  |
| H | -2.295758 | -0.311724 | -0.094158 |
| C | 1.391881  | -0.810871 | 0.260215  |
| H | 1.418602  | -1.828445 | -0.124342 |
| H | 2.285092  | -0.270354 | -0.046367 |
| H | 1.265955  | -0.792852 | 1.340696  |
| S | -0.002712 | 0.000966  | -0.529895 |

SCF energy : -517.678056186

Gibbs free energy: -517.591351

#### Frequencies

|           |           |           |           |           |           |           |
|-----------|-----------|-----------|-----------|-----------|-----------|-----------|
| 156.2801  | 207.8385  | 254.0951  | 285.5373  | 300.4038  | 342.7269  | 654.1474  |
| 733.9928  | 742.1719  | 902.3389  | 941.9712  | 945.7556  | 1035.5038 | 1057.5819 |
| 1069.5255 | 1327.2849 | 1329.3575 | 1361.7161 | 1416.5773 | 1425.0343 | 1430.6255 |
| 1440.4686 | 1449.2001 | 1460.5989 | 3076.3623 | 3089.4427 | 3098.3090 | 3188.7446 |
| 3201.4109 | 3203.7823 | 3210.7780 | 3211.3819 | 3218.5885 |           |           |

### S.16.2 Tripod ion pair in 1-bromooctane

#### Cartesian coordinates (standard orientation)

|    |           |           |           |
|----|-----------|-----------|-----------|
| C  | -0.686000 | -0.886931 | -1.345323 |
| H  | 0.394249  | -0.796508 | -1.209557 |
| H  | -1.025681 | -1.919759 | -1.291532 |
| H  | -1.028266 | -0.430156 | -2.272339 |
| C  | -0.720740 | 1.610460  | -0.094789 |
| H  | -1.076926 | 2.177756  | 0.763389  |
| H  | 0.362544  | 1.472352  | -0.081230 |
| H  | -1.068373 | 2.073340  | -1.016663 |
| C  | -0.704804 | -0.721622 | 1.441480  |
| H  | -1.080742 | -0.177560 | 2.306245  |
| H  | -1.021885 | -1.761861 | 1.490442  |
| H  | 0.376403  | -0.622219 | 1.322460  |
| S  | -1.504577 | -0.007862 | -0.004646 |
| Cl | 2.465363  | 0.005822  | 0.003230  |

SCF energy : -978.095399984

Gibbs free energy: -978.013114

#### Frequencies

|          |          |          |          |          |          |          |
|----------|----------|----------|----------|----------|----------|----------|
| 83.5092  | 98.4434  | 123.6127 | 208.1868 | 223.6205 | 232.7922 | 268.5134 |
| 286.0274 | 317.3643 | 649.3295 | 722.5004 | 734.9430 | 908.8439 | 956.6755 |

|           |           |           |           |           |           |           |
|-----------|-----------|-----------|-----------|-----------|-----------|-----------|
| 959.9059  | 1055.8572 | 1057.5887 | 1071.9647 | 1318.3958 | 1323.6646 | 1358.5158 |
| 1416.5773 | 1420.2370 | 1436.6302 | 1441.5141 | 1450.8944 | 1457.1952 | 3038.4235 |
| 3043.0573 | 3052.2266 | 3171.0115 | 3173.7960 | 3177.7611 | 3199.0392 | 3199.4599 |
| 3203.6261 |           |           |           |           |           |           |

### S.16.3 Linear ion pair in 1-bromooctane

Cartesian coordinates (standard orientation)

|    |           |           |           |
|----|-----------|-----------|-----------|
| C  | 2.084619  | -1.357930 | 0.512599  |
| H  | 1.623386  | -1.267692 | 1.493863  |
| H  | 1.777673  | -2.276299 | 0.016513  |
| H  | 3.170006  | -1.312190 | 0.574504  |
| C  | 1.964646  | 1.431748  | 0.466512  |
| H  | 1.598172  | 2.306050  | -0.067753 |
| H  | 1.495325  | 1.341147  | 1.443921  |
| H  | 3.049130  | 1.469749  | 0.544011  |
| C  | -0.235467 | -0.072322 | -0.385752 |
| H  | -0.640823 | 0.790508  | -0.907840 |
| H  | -0.562695 | -0.984598 | -0.877796 |
| H  | -0.527280 | -0.063168 | 0.660931  |
| S  | 1.557637  | -0.000337 | -0.541296 |
| Cl | -3.458110 | -0.000417 | 0.130602  |

SCF energy : -978.084533229

Gibbs free energy: -978.003254

Frequencies

|           |           |           |           |           |           |           |
|-----------|-----------|-----------|-----------|-----------|-----------|-----------|
| 55.9712   | 63.0656   | 103.2345  | 189.8793  | 210.2602  | 237.2755  | 267.2491  |
| 290.3082  | 317.7428  | 648.2794  | 725.5106  | 744.1028  | 901.5948  | 938.4572  |
| 946.6271  | 1042.4498 | 1048.3919 | 1050.4493 | 1311.9381 | 1330.7599 | 1355.8234 |
| 1417.4798 | 1420.8864 | 1426.4491 | 1439.2710 | 1439.8898 | 1446.9215 | 3088.6539 |
| 3091.5201 | 3108.4751 | 3203.2057 | 3203.7168 | 3208.3081 | 3213.3651 | 3225.0575 |
| 3227.6525 |           |           |           |           |           |           |

### S.16.4 Linear transition state in 1-bromooctane

Cartesian coordinates (standard orientation)

|   |           |           |           |
|---|-----------|-----------|-----------|
| C | 1.970203  | -1.388776 | 0.465443  |
| H | 1.445016  | -1.336852 | 1.419127  |
| H | 1.687908  | -2.296143 | -0.066256 |
| H | 3.047806  | -1.378086 | 0.621378  |
| C | 1.969246  | 1.389175  | 0.465259  |
| H | 1.687001  | 2.296288  | -0.066898 |
| H | 1.443479  | 1.337398  | 1.418647  |
| H | 3.046752  | 1.378849  | 0.621876  |
| C | -0.802209 | -0.000217 | -0.244407 |

|    |           |           |           |
|----|-----------|-----------|-----------|
| H  | -0.906999 | 0.927889  | -0.777105 |
| H  | -0.906377 | -0.930961 | -0.772637 |
| H  | -0.664369 | 0.002418  | 0.822371  |
| S  | 1.508468  | -0.000027 | -0.588976 |
| Cl | -3.108185 | -0.000085 | 0.122667  |

SCF energy : -978.055681505

Gibbs free energy: -977.978975

#### Frequencies

|           |           |           |           |           |           |           |
|-----------|-----------|-----------|-----------|-----------|-----------|-----------|
| -581.4053 | 12.3942   | 55.1526   | 68.3690   | 135.1419  | 180.3022  | 232.8383  |
| 251.2869  | 264.9501  | 297.9055  | 703.1385  | 754.0445  | 913.9137  | 938.7182  |
| 965.7874  | 996.1848  | 997.1334  | 1038.3396 | 1049.1190 | 1318.5580 | 1347.8809 |
| 1354.4464 | 1362.8011 | 1432.5597 | 1434.7980 | 1449.7075 | 1453.2512 | 3069.5908 |
| 3072.9252 | 3171.2094 | 3172.5704 | 3174.8745 | 3187.6848 | 3187.9839 | 3381.4939 |
| 3382.1786 |           |           |           |           |           |           |

### S.16.5 Immediate product cluster in 1-bromooctane

#### Cartesian coordinates (standard orientation)

|    |           |           |           |
|----|-----------|-----------|-----------|
| C  | -1.799108 | 1.421808  | 0.504760  |
| H  | -0.924933 | 1.243801  | 1.133468  |
| H  | -1.624135 | 2.305257  | -0.108555 |
| H  | -2.678657 | 1.587396  | 1.127691  |
| C  | -2.342409 | -1.282412 | 0.578147  |
| H  | -2.516609 | -2.197497 | 0.013044  |
| H  | -1.464760 | -1.415288 | 1.212592  |
| H  | -3.217777 | -1.068596 | 1.192561  |
| C  | 1.621450  | -0.181508 | -0.346555 |
| H  | 1.571784  | -0.886212 | -1.171200 |
| H  | 1.255499  | 0.794189  | -0.651784 |
| H  | 1.064369  | -0.550747 | 0.509694  |
| S  | -2.069347 | 0.038059  | -0.626696 |
| Cl | 3.339127  | -0.009917 | 0.138324  |

SCF energy : -978.095395451

Gibbs free energy: -978.017727

#### Frequencies

|           |           |           |           |           |           |           |
|-----------|-----------|-----------|-----------|-----------|-----------|-----------|
| 54.2308   | 64.6434   | 74.2471   | 80.8981   | 102.2484  | 114.8671  | 189.7648  |
| 197.0890  | 277.2185  | 705.2874  | 729.1375  | 759.1061  | 913.5629  | 954.9141  |
| 988.0331  | 1029.5810 | 1038.0411 | 1053.4778 | 1320.7053 | 1344.4268 | 1361.3513 |
| 1436.0803 | 1445.0558 | 1448.0704 | 1451.4190 | 1455.3048 | 1463.1383 | 3057.4041 |
| 3061.0117 | 3108.2352 | 3141.5775 | 3150.0154 | 3169.5660 | 3172.4387 | 3219.1585 |
| 3222.2508 |           |           |           |           |           |           |

### S.16.6 CH<sub>3</sub>Cl in 1-bromooctane

Cartesian coordinates (standard orientation)

|    |           |           |           |
|----|-----------|-----------|-----------|
| C  | 0.000000  | 0.000000  | -1.132559 |
| H  | 0.000000  | 1.033240  | -1.468018 |
| H  | 0.894812  | -0.516620 | -1.468018 |
| H  | -0.894812 | -0.516620 | -1.468018 |
| Cl | 0.000000  | 0.000000  | 0.658789  |

SCF energy : -500.112093367

Gibbs free energy: -500.096953

Frequencies

727.6307 1030.3872 1030.9515 1358.6047 1454.0614 1454.4088 3098.6247  
3210.6550 3210.8540

### S.16.7 (CH<sub>3</sub>)<sub>2</sub>S in 1-bromooctane

Cartesian coordinates (standard orientation)

|   |           |           |           |
|---|-----------|-----------|-----------|
| C | -1.379923 | 0.511224  | 0.000044  |
| H | -1.356494 | 1.135858  | -0.894158 |
| H | -2.296058 | -0.079130 | -0.000673 |
| H | -1.356849 | 1.135306  | 0.894478  |
| C | 1.379928  | 0.511222  | 0.000044  |
| H | 2.296060  | -0.079136 | -0.000763 |
| H | 1.356447  | 1.135916  | -0.894114 |
| H | 1.356896  | 1.135237  | 0.894525  |
| S | -0.000002 | -0.657420 | 0.000011  |

SCF energy : -477.981239593

Gibbs free energy: -477.932657

Frequencies

187.8700 209.6241 274.8498 701.2327 751.5780 912.0124 946.9988  
983.5590 1039.0309 1314.0694 1338.3387 1434.0025 1444.8253 1448.0633  
1454.9921 3048.0735 3051.2504 3133.0257 3141.1703 3161.8046 3163.1695

### S.16.8 CH<sub>3</sub><sup>+</sup> in 1-bromooctane

Cartesian coordinates (standard orientation)

|   |           |           |           |
|---|-----------|-----------|-----------|
| C | 0.000021  | 0.000024  | -0.000013 |
| H | -0.214384 | 1.065029  | 0.000025  |
| H | -0.815587 | -0.718145 | 0.000025  |
| H | 1.029845  | -0.347027 | 0.000025  |

SCF energy : -39.5485878289

Gibbs free energy: -39.536271

Frequencies

1375.6445 1381.0315 1406.2779 3068.7603 3269.0893 3277.1738

## S.17 Selected cluster geometries in chloroform

### S.17.1 (CH<sub>3</sub>)<sub>3</sub>S<sup>+</sup> in chloroform

Cartesian coordinates (input orientation)

|   |           |           |           |
|---|-----------|-----------|-----------|
| C | 0.003338  | 1.612244  | 0.263399  |
| H | 0.006005  | 1.491946  | 1.344586  |
| H | 0.895157  | 2.129724  | -0.083908 |
| H | -0.888088 | 2.133525  | -0.079582 |
| C | -1.396395 | -0.801810 | 0.272400  |
| H | -1.381256 | -1.844425 | -0.038864 |
| H | -1.302726 | -0.706956 | 1.352053  |
| H | -2.296046 | -0.312357 | -0.095069 |
| C | 1.392065  | -0.810946 | 0.259952  |
| H | 1.419683  | -1.828136 | -0.125597 |
| H | 2.284994  | -0.269597 | -0.046082 |
| H | 1.266100  | -0.794018 | 1.340463  |
| S | -0.002832 | 0.000808  | -0.529790 |

SCF energy : -517.676918908

Gibbs free energy: -517.590279

Frequencies

154.4608 200.1254 252.8596 286.6814 300.6289 343.3210 653.6889  
733.8680 742.0159 902.3543 941.7937 945.0204 1034.0202 1056.9363  
1069.3369 1326.7237 1329.4673 1360.5306 1416.5384 1425.0955 1430.7753  
1440.3272 1449.4693 1460.8574 3076.0071 3089.2230 3098.1847 3188.3691  
3201.0400 3203.4118 3210.5831 3211.2076 3218.5275

### S.17.2 Tripod ion pair in chloroform

Cartesian coordinates (standard orientation)

|   |           |           |           |
|---|-----------|-----------|-----------|
| C | -0.681779 | 1.508960  | -0.567369 |
| H | 0.397093  | 1.366102  | -0.472417 |
| H | -0.986758 | 1.672002  | -1.599483 |
| H | -1.052978 | 2.315971  | 0.061961  |
| C | -0.747724 | -0.260828 | 1.591726  |
| H | -1.106342 | -1.224257 | 1.950273  |
| H | 0.337310  | -0.241025 | 1.471156  |
| H | -1.106681 | 0.534734  | 2.242041  |



|    |           |           |           |
|----|-----------|-----------|-----------|
| C  | -0.694096 | -1.250730 | -1.017230 |
| H  | -1.063185 | -2.213158 | -0.666173 |
| H  | -1.009655 | -1.085273 | -2.045775 |
| H  | 0.386032  | -1.147028 | -0.891080 |
| S  | -1.508147 | 0.006910  | -0.018860 |
| Cl | 2.475124  | -0.004296 | 0.012265  |

SCF energy : -978.094688438

Gibbs free energy: -978.012006

#### Frequencies

|           |           |           |           |           |           |           |
|-----------|-----------|-----------|-----------|-----------|-----------|-----------|
| 93.1185   | 106.7721  | 121.9003  | 215.7584  | 228.1537  | 258.1968  | 275.8283  |
| 285.9425  | 318.7419  | 648.5442  | 723.1565  | 731.2320  | 909.8518  | 957.8162  |
| 962.2156  | 1053.7824 | 1059.6990 | 1072.8850 | 1321.9490 | 1324.5322 | 1358.8734 |
| 1419.7376 | 1423.7230 | 1439.6233 | 1445.0327 | 1453.4254 | 1455.6055 | 3036.5690 |
| 3041.3538 | 3054.3559 | 3167.5410 | 3175.2167 | 3178.2302 | 3193.8523 | 3200.5797 |
| 3205.4126 |           |           |           |           |           |           |

### S.17.3 Linear transition state in chloroform

#### Cartesian coordinates (standard orientation)

|    |           |           |           |
|----|-----------|-----------|-----------|
| C  | 1.967770  | -1.388841 | 0.465913  |
| H  | 1.441081  | -1.336683 | 1.418782  |
| H  | 1.685956  | -2.296147 | -0.066154 |
| H  | 3.045136  | -1.378516 | 0.623462  |
| C  | 1.967540  | 1.388936  | 0.465869  |
| H  | 1.685749  | 2.296180  | -0.066315 |
| H  | 1.440698  | 1.336821  | 1.418660  |
| H  | 3.044880  | 1.378692  | 0.623597  |
| C  | -0.799104 | -0.000051 | -0.245759 |
| H  | -0.905786 | 0.928962  | -0.776550 |
| H  | -0.905616 | -0.929782 | -0.775336 |
| H  | -0.663147 | 0.000664  | 0.821273  |
| S  | 1.507937  | -0.000006 | -0.589130 |
| Cl | -3.106658 | -0.000021 | 0.122854  |

SCF energy : -978.055229748

Gibbs free energy: -977.978115

#### Frequencies

|           |          |          |           |           |           |           |
|-----------|----------|----------|-----------|-----------|-----------|-----------|
| -579.3877 | 18.3078  | 58.5672  | 68.0163   | 133.6821  | 180.6708  | 231.5474  |
| 251.7645  | 265.3975 | 297.6148 | 703.1649  | 754.0105  | 913.8923  | 938.6533  |
| 965.7159  | 996.6910 | 996.8110 | 1038.2944 | 1048.9339 | 1318.6197 | 1347.6800 |

1354.4542 1362.9764 1432.6102 1434.7852 1449.6875 1453.2222 3069.5128  
3072.9452 3171.1849 3172.4901 3174.7546 3187.7617 3188.1129 3381.1625  
3381.9213

#### S.17.4 Immediate product cluster in chlorform

Cartesian coordinates (standard orientation)

|    |           |           |           |
|----|-----------|-----------|-----------|
| C  | -1.801899 | 1.422017  | 0.504483  |
| H  | -0.928045 | 1.245832  | 1.134173  |
| H  | -1.627858 | 2.305590  | -0.108917 |
| H  | -2.682359 | 1.586361  | 1.126467  |
| C  | -2.341067 | -1.282805 | 0.578254  |
| H  | -2.513039 | -2.198436 | 0.013351  |
| H  | -1.464066 | -1.414075 | 1.213965  |
| H  | -3.217615 | -1.070220 | 1.191426  |
| C  | 1.621698  | -0.181582 | -0.346277 |
| H  | 1.571212  | -0.891818 | -1.166122 |
| H  | 1.257212  | 0.792471  | -0.658440 |
| H  | 1.063486  | -0.544126 | 0.512112  |
| S  | -2.068613 | 0.037521  | -0.626834 |
| Cl | 3.339205  | -0.009276 | 0.138387  |

SCF energy : -978.095297278

Gibbs free energy: -978.017496

Frequencies

53.8368 66.6490 77.9096 81.1238 103.4850 120.4750 190.1621  
196.3525 277.2141 705.2764 729.3975 759.0663 913.5120 954.9560  
988.0472 1029.5847 1038.0453 1055.0005 1320.8150 1344.4998 1361.7552  
1436.2635 1445.1606 1448.3449 1451.9302 1455.7234 1463.4682 3057.4116  
3060.9900 3107.6417 3141.4573 3149.8730 3169.5971 3172.5644 3218.6223  
3221.7706

#### S.17.5 CH<sub>3</sub>Cl in chlorofom

Cartesian coordinates (standard orientation)

|    |           |           |           |
|----|-----------|-----------|-----------|
| C  | 0.000000  | 0.000000  | -1.132427 |
| H  | 0.000000  | 1.033215  | -1.468008 |
| H  | 0.894790  | -0.516607 | -1.468008 |
| H  | -0.894790 | -0.516607 | -1.468008 |
| Cl | 0.000000  | 0.000000  | 0.658740  |

SCF energy : -500.112041727

Gibbs free energy: -500.096900

### Frequencies

727.9894 1030.4130 1030.9627 1358.7200 1454.3060 1454.6585 3098.5003  
3210.4387 3210.6396

### S.17.6 (CH<sub>3</sub>)<sub>2</sub>S in chloroform

#### Cartesian coordinates (standard orientation)

|   |           |           |           |
|---|-----------|-----------|-----------|
| C | -1.379819 | 0.511253  | 0.000044  |
| H | -1.356479 | 1.135887  | -0.894179 |
| H | -2.295982 | -0.079067 | -0.000659 |
| H | -1.356822 | 1.135360  | 0.894481  |
| C | 1.379825  | 0.511251  | 0.000044  |
| H | 2.295984  | -0.079073 | -0.000750 |
| H | 1.356432  | 1.135945  | -0.894134 |
| H | 1.356870  | 1.135291  | 0.894528  |
| S | -0.000002 | -0.657461 | 0.000011  |

SCF energy : -477.981177276

Gibbs free energy: -477.932593

### Frequencies

187.9143 209.6437 274.9035 701.3655 751.6865 911.9582 946.9569  
983.6266 1039.0781 1314.1368 1338.4406 1434.1770 1445.0291 1448.2261  
1455.2375 3047.9699 3051.1473 3132.8374 3140.9958 3161.7395 3163.0942

### S.17.7 CH<sub>3</sub><sup>+</sup> in chloroform

#### Cartesian coordinates (standard orientation)

|   |           |           |           |
|---|-----------|-----------|-----------|
| C | 0.000021  | 0.000025  | -0.000014 |
| H | -0.218580 | 1.064245  | 0.000028  |
| H | -0.812806 | -0.721392 | 0.000028  |
| H | 1.031263  | -0.343005 | 0.000028  |

SCF energy : -39.5470369074

Gibbs free energy: -39.534713

### Frequencies

1378.6836 1384.0825 1405.9497 3067.7554 3268.1264 3276.2049

## S.18 Selected cluster geometries in ether

### S.18.1 (CH<sub>3</sub>)<sub>3</sub>S<sup>+</sup> in ether

#### Cartesian coordinates (standard orientation)

|   |           |           |           |
|---|-----------|-----------|-----------|
| C | -0.914456 | -1.332102 | 0.266013  |
| H | -0.841406 | -1.245058 | 1.348051  |
| H | -1.945247 | -1.245561 | -0.072677 |

|   |           |           |           |
|---|-----------|-----------|-----------|
| H | -0.487156 | -2.267225 | -0.090364 |
| C | 1.612468  | -0.123142 | 0.267613  |
| H | 2.196023  | 0.730570  | -0.071602 |
| H | 1.497945  | -0.123526 | 1.349333  |
| H | 2.069137  | -1.045287 | -0.086770 |
| C | -0.700925 | 1.455090  | 0.266058  |
| H | -0.122841 | 2.310565  | -0.077384 |
| H | -1.727330 | 1.538157  | -0.086523 |
| H | -0.657521 | 1.351759  | 1.348171  |
| S | 0.002242  | -0.000217 | -0.522396 |

SCF energy : -517.675002419

Gibbs free energy: -517.588909

#### Frequencies

|           |           |           |           |           |           |           |
|-----------|-----------|-----------|-----------|-----------|-----------|-----------|
| 150.8517  | 161.2537  | 229.6559  | 264.1786  | 293.7821  | 313.7141  | 650.5798  |
| 730.4532  | 735.2691  | 903.0337  | 937.3910  | 951.7208  | 1042.4189 | 1051.0672 |
| 1060.8693 | 1323.2005 | 1337.2442 | 1362.4001 | 1419.0778 | 1420.9976 | 1428.1141 |
| 1431.5617 | 1447.5043 | 1450.8120 | 3089.2730 | 3094.3969 | 3097.0475 | 3200.5351 |
| 3205.4324 | 3207.7819 | 3210.3348 | 3213.9116 | 3220.6070 |           |           |

### S.18.2 Tripod ion pair in ether

#### Cartesian coordinates (standard orientation)

|    |           |           |           |
|----|-----------|-----------|-----------|
| C  | -0.686457 | -0.445782 | 1.548306  |
| H  | 0.394578  | -0.408309 | 1.392125  |
| H  | -1.023865 | 0.270392  | 2.295781  |
| H  | -1.035189 | -1.444734 | 1.804490  |
| C  | -0.707569 | -1.119358 | -1.160638 |
| H  | -1.085962 | -0.858944 | -2.147684 |
| H  | 0.374574  | -0.991956 | -1.080208 |
| H  | -1.027221 | -2.124938 | -0.892189 |
| C  | -0.703505 | 1.564952  | -0.389226 |
| H  | -1.057473 | 1.854257  | -1.377299 |
| H  | -1.044974 | 2.283159  | 0.354062  |
| H  | 0.378843  | 1.418353  | -0.360243 |
| S  | -1.500148 | -0.000249 | 0.005825  |
| Cl | 2.453779  | 0.000461  | -0.004275 |

SCF energy : -978.093395163

Gibbs free energy: -978.010905

#### Frequencies

|          |          |          |          |          |          |          |
|----------|----------|----------|----------|----------|----------|----------|
| 91.6263  | 99.1715  | 129.4650 | 200.4743 | 239.8084 | 244.4486 | 269.9507 |
| 279.9330 | 320.6510 | 648.3981 | 724.3868 | 727.4106 | 906.8128 | 957.1449 |

|           |           |           |           |           |           |           |
|-----------|-----------|-----------|-----------|-----------|-----------|-----------|
| 962.3299  | 1053.4634 | 1058.1463 | 1075.9466 | 1319.9255 | 1322.2285 | 1357.7843 |
| 1418.2936 | 1419.9040 | 1435.4147 | 1443.9655 | 1451.8118 | 1455.2270 | 3036.1628 |
| 3042.2598 | 3049.5053 | 3170.8329 | 3171.2667 | 3176.5848 | 3198.0679 | 3202.6333 |
| 3204.1701 |           |           |           |           |           |           |

### S.18.3 Linear ion pair in ether

Cartesian coordinates (standard orientation)

|    |           |           |           |
|----|-----------|-----------|-----------|
| C  | 2.032411  | -1.393467 | 0.471355  |
| H  | 1.612047  | -1.293079 | 1.471398  |
| H  | 1.662078  | -2.291604 | -0.022121 |
| H  | 3.121475  | -1.402882 | 0.492424  |
| C  | 2.026701  | 1.396993  | 0.469374  |
| H  | 1.652558  | 2.292866  | -0.025354 |
| H  | 1.606982  | 1.296258  | 1.469646  |
| H  | 3.115728  | 1.410838  | 0.490130  |
| C  | -0.260432 | -0.003584 | -0.319774 |
| H  | -0.651096 | 0.884130  | -0.812653 |
| H  | -0.647984 | -0.892540 | -0.812861 |
| H  | -0.510115 | -0.003972 | 0.738859  |
| S  | 1.527870  | 0.000002  | -0.547107 |
| Cl | -3.423510 | 0.000018  | 0.119913  |

SCF energy : -978.080983893

Gibbs free energy: -977.999701

Frequencies

|           |           |           |           |           |           |           |
|-----------|-----------|-----------|-----------|-----------|-----------|-----------|
| 54.7933   | 64.2960   | 112.9472  | 194.4720  | 230.0489  | 232.2322  | 275.6372  |
| 289.3764  | 318.5744  | 643.1941  | 723.0906  | 745.8600  | 908.0535  | 940.2598  |
| 948.2360  | 1044.9354 | 1051.3184 | 1053.1779 | 1317.0761 | 1329.1951 | 1359.0371 |
| 1415.5596 | 1419.6118 | 1427.5149 | 1434.1179 | 1439.4040 | 1446.1692 | 3076.1995 |
| 3076.8074 | 3098.7687 | 3190.2003 | 3190.6493 | 3195.2091 | 3195.4727 | 3215.4433 |
| 3219.5457 |           |           |           |           |           |           |

### S.18.4 Seesaw ion pair in ether

Cartesian coordinates (standard orientation)

|    |           |           |           |
|----|-----------|-----------|-----------|
| Cl | 2.633799  | -0.000002 | -0.186443 |
| S  | -0.820589 | 0.000001  | -0.404031 |
| C  | -0.419974 | -1.398556 | 0.650038  |
| C  | -2.620464 | -0.000002 | -0.342271 |
| C  | -0.419969 | 1.398559  | 0.650037  |
| H  | -0.914892 | -1.288692 | 1.613097  |
| H  | -2.967895 | -0.000009 | 0.689381  |
| H  | -0.914859 | 1.288679  | 1.613107  |
| H  | -0.752756 | -2.292853 | 0.126322  |

|   |           |           |           |
|---|-----------|-----------|-----------|
| H | -2.957585 | 0.890022  | -0.870683 |
| H | 0.667813  | 1.379201  | 0.730162  |
| H | 0.667806  | -1.379179 | 0.730192  |
| H | -2.957582 | -0.890018 | -0.870696 |
| H | -0.752782 | 2.292853  | 0.126336  |

SCF energy : -978.090546376

Gibbs free energy: -978.008413

#### Frequencies

|           |           |           |           |           |           |           |
|-----------|-----------|-----------|-----------|-----------|-----------|-----------|
| 33.4119   | 121.0315  | 141.4066  | 202.1858  | 230.0764  | 261.1504  | 280.4427  |
| 282.5037  | 302.7167  | 654.8884  | 736.6493  | 737.8377  | 905.4128  | 950.8644  |
| 951.7063  | 1048.7195 | 1051.3237 | 1060.6438 | 1312.8990 | 1322.0955 | 1349.7049 |
| 1415.4916 | 1428.6951 | 1434.2465 | 1438.5178 | 1450.3147 | 1463.7380 | 3065.7307 |
| 3070.6033 | 3084.8224 | 3184.4561 | 3188.9632 | 3196.3273 | 3197.0210 | 3199.5674 |
| 3200.5147 |           |           |           |           |           |           |

### S.18.5 Linear transition state in ether

#### Cartesian coordinates (standard orientation)

|    |           |           |           |
|----|-----------|-----------|-----------|
| C  | -1.963663 | 1.388753  | 0.466946  |
| H  | -1.434345 | 1.335985  | 1.418367  |
| H  | -1.682719 | 2.296080  | -0.065562 |
| H  | -3.040611 | 1.378974  | 0.627289  |
| C  | -1.963832 | -1.388681 | 0.466979  |
| H  | -1.682966 | -2.296050 | -0.065498 |
| H  | -1.434529 | -1.335943 | 1.418410  |
| H  | -3.040784 | -1.378784 | 0.627300  |
| C  | 0.793516  | -0.000042 | -0.248362 |
| H  | 0.903890  | -0.929323 | -0.778011 |
| H  | 0.903892  | 0.929209  | -0.778064 |
| H  | 0.660825  | -0.000009 | 0.819098  |
| S  | -1.507095 | -0.000005 | -0.589457 |
| Cl | 3.103808  | -0.000014 | 0.123212  |

SCF energy : -978.054431293

Gibbs free energy: -977.976844

#### Frequencies

|           |           |           |           |           |           |           |
|-----------|-----------|-----------|-----------|-----------|-----------|-----------|
| -575.6346 | 27.0135   | 65.9907   | 68.5041   | 131.5847  | 181.3892  | 228.9956  |
| 252.7976  | 266.2441  | 297.0423  | 703.2019  | 753.9425  | 913.8984  | 938.6963  |
| 965.6820  | 996.5781  | 997.7433  | 1038.5001 | 1048.5614 | 1318.8020 | 1347.3076 |
| 1354.6278 | 1363.2701 | 1432.6826 | 1434.8819 | 1449.5851 | 1453.1832 | 3069.4295 |
| 3073.0173 | 3171.1958 | 3172.2746 | 3174.6465 | 3187.9458 | 3188.4042 | 3380.3853 |
| 3381.6057 |           |           |           |           |           |           |

### S.18.6 Transition state for an attack from the seesaw ion pair

Cartesian coordinates (standard orientation)

|    |           |           |           |
|----|-----------|-----------|-----------|
| Cl | -2.304256 | -0.235866 | -0.213264 |
| S  | 0.881508  | -0.172390 | -0.530553 |
| C  | -0.642365 | 1.586192  | 0.637761  |
| C  | 2.468340  | 0.597712  | -0.154739 |
| C  | 0.857669  | -1.455387 | 0.735081  |
| H  | 0.151452  | 1.411824  | 1.347640  |
| H  | 2.458508  | 1.032430  | 0.847837  |
| H  | 0.994894  | -1.018013 | 1.724904  |
| H  | -0.423543 | 2.191773  | -0.227861 |
| H  | 3.267459  | -0.140035 | -0.227547 |
| H  | -0.120805 | -1.925395 | 0.668636  |
| H  | -1.636798 | 1.643752  | 1.037536  |
| H  | 2.630768  | 1.380826  | -0.893968 |
| H  | 1.644412  | -2.180301 | 0.528540  |

SCF energy : -978.007758504

Gibbs free energy: -977.929657

Frequencies

|           |           |           |           |           |           |           |
|-----------|-----------|-----------|-----------|-----------|-----------|-----------|
| -471.9031 | 71.0954   | 100.2428  | 134.6895  | 143.2819  | 167.9461  | 177.1735  |
| 192.7651  | 274.5309  | 316.4043  | 682.6387  | 699.0433  | 743.7792  | 762.1077  |
| 912.1170  | 948.3760  | 973.3854  | 1036.3097 | 1092.7951 | 1318.5257 | 1337.4508 |
| 1390.1653 | 1433.4581 | 1434.6766 | 1441.2620 | 1445.5529 | 1451.5808 | 3055.7850 |
| 3065.7271 | 3146.7101 | 3159.2265 | 3160.9251 | 3174.3005 | 3193.9700 | 3329.1886 |
| 3368.3173 |           |           |           |           |           |           |

### S.18.7 Transition state for a direct attack in ether

Results from the Integral=UltraFineGrid calculation.

Cartesian coordinates (standard orientation)

|   |           |           |           |
|---|-----------|-----------|-----------|
| C | -1.207438 | -0.695843 | -1.374117 |
| H | -2.013488 | -1.426744 | -1.306096 |
| H | -1.308234 | -0.124700 | -2.296156 |
| H | -0.229328 | -1.174019 | -1.326854 |
| C | -1.202122 | -0.636228 | 1.399365  |
| H | -0.224744 | -1.117050 | 1.369111  |
| H | -1.300239 | -0.026135 | 2.296426  |
| H | -2.008737 | -1.368883 | 1.366036  |
| C | 1.003904  | 1.829075  | -0.024926 |
| H | 2.020751  | 1.661154  | -0.324207 |
| H | 0.336026  | 2.287227  | -0.734939 |
| H | 0.798738  | 1.958750  | 1.026381  |

|    |           |           |           |
|----|-----------|-----------|-----------|
| S  | -1.349288 | 0.474088  | -0.011456 |
| Cl | 1.997164  | -0.661002 | 0.006568  |

SCF energy : -978.007514835

Gibbs free energy: -977.930795

#### Frequencies

|           |           |           |           |           |           |           |
|-----------|-----------|-----------|-----------|-----------|-----------|-----------|
| -443.8231 | 35.7559   | 63.5773   | 129.3206  | 147.9800  | 156.7984  | 183.8723  |
| 211.2168  | 263.0489  | 299.5426  | 652.3879  | 684.3419  | 711.3592  | 764.2936  |
| 921.4476  | 945.5074  | 975.4022  | 1047.9836 | 1088.8196 | 1307.8710 | 1330.7660 |
| 1381.6247 | 1419.8020 | 1425.8700 | 1439.8166 | 1446.2836 | 1456.2652 | 3056.6504 |
| 3057.0745 | 3159.4981 | 3164.5889 | 3166.3294 | 3175.4661 | 3176.5236 | 3342.3720 |
| 3371.9093 |           |           |           |           |           |           |

### S.18.8 Immediate product cluster in ether

#### Cartesian coordinates (standard orientation)

|    |           |           |           |
|----|-----------|-----------|-----------|
| C  | -1.810593 | 1.422344  | 0.504228  |
| H  | -0.937735 | 1.251256  | 1.136735  |
| H  | -1.639355 | 2.306522  | -0.109075 |
| H  | -2.693773 | 1.582620  | 1.123426  |
| C  | -2.336875 | -1.284693 | 0.577844  |
| H  | -2.502315 | -2.201561 | 0.013005  |
| H  | -1.461589 | -1.411422 | 1.216907  |
| H  | -3.216694 | -1.076151 | 1.187721  |
| C  | 1.622078  | -0.179592 | -0.344714 |
| H  | 1.568203  | -0.901802 | -1.153822 |
| H  | 1.261999  | 0.791257  | -0.671772 |
| H  | 1.061615  | -0.526596 | 0.518673  |
| S  | -2.066632 | 0.036019  | -0.627212 |
| Cl | 3.339888  | -0.008164 | 0.138203  |

SCF energy : -978.095125966

Gibbs free energy: -978.017229

#### Frequencies

|           |           |           |           |           |           |           |
|-----------|-----------|-----------|-----------|-----------|-----------|-----------|
| 50.6655   | 68.9013   | 79.1527   | 83.0488   | 103.8137  | 132.6071  | 189.8270  |
| 194.6749  | 277.1599  | 705.0759  | 729.9186  | 758.7842  | 913.3712  | 954.9942  |
| 988.0097  | 1029.4153 | 1037.9769 | 1057.1552 | 1321.0083 | 1344.5972 | 1362.2939 |
| 1436.5861 | 1445.2730 | 1448.6560 | 1452.8914 | 1456.3760 | 1463.7331 | 3057.4749 |
| 3060.9357 | 3105.5756 | 3141.2519 | 3149.5363 | 3169.7356 | 3172.9592 | 3216.5889 |
| 3220.2066 |           |           |           |           |           |           |



### S.18.9 Single bonded product cluster

Cartesian coordinates (standard orientation)

|    |           |           |           |
|----|-----------|-----------|-----------|
| Cl | -2.627646 | -0.366772 | 0.011363  |
| S  | 1.775817  | -0.155617 | -0.658464 |
| C  | -1.810327 | 1.228223  | -0.014722 |
| C  | 2.418267  | 1.047690  | 0.528945  |
| C  | 1.147282  | -1.402435 | 0.490852  |
| H  | -1.875459 | 1.653708  | 0.983012  |
| H  | 1.616507  | 1.435429  | 1.159910  |
| H  | 0.363676  | -0.986092 | 1.125664  |
| H  | -0.776010 | 1.064385  | -0.310851 |
| H  | 3.196847  | 0.600352  | 1.147934  |
| H  | 0.723001  | -2.203734 | -0.113143 |
| H  | -2.326458 | 1.855708  | -0.735758 |
| H  | 2.847021  | 1.866415  | -0.048100 |
| H  | 1.956462  | -1.802050 | 1.103147  |

SCF energy : -978.095643452

Gibbs free energy: -978.017885

Frequencies

|           |           |           |           |           |           |           |
|-----------|-----------|-----------|-----------|-----------|-----------|-----------|
| 42.3056   | 55.4903   | 69.7539   | 89.4555   | 98.6093   | 135.0475  | 204.0769  |
| 207.2523  | 272.9593  | 710.2082  | 730.7922  | 765.2887  | 912.2632  | 959.4627  |
| 991.2540  | 1033.6813 | 1038.3870 | 1041.8192 | 1322.2086 | 1345.5133 | 1363.5402 |
| 1434.5229 | 1443.6428 | 1451.1415 | 1454.3251 | 1455.6470 | 1464.3058 | 3060.7751 |
| 3066.4924 | 3087.1249 | 3149.2145 | 3159.2777 | 3172.7631 | 3177.2105 | 3195.6375 |
| 3214.3734 |           |           |           |           |           |           |

### S.18.10 CH<sub>3</sub>Cl in ether

Cartesian coordinates (standard orientation)

|    |           |           |           |
|----|-----------|-----------|-----------|
| C  | 0.000000  | 0.000000  | -1.131795 |
| H  | 0.000000  | 1.032622  | -1.468298 |
| H  | 0.894277  | -0.516311 | -1.468298 |
| H  | -0.894277 | -0.516311 | -1.468298 |
| Cl | 0.000000  | 0.000000  | 0.658568  |

SCF energy : -500.111951633

Gibbs free energy: -500.096792

Frequencies

|           |           |           |           |           |           |           |
|-----------|-----------|-----------|-----------|-----------|-----------|-----------|
| 729.1772  | 1029.3963 | 1029.9186 | 1358.7200 | 1454.4554 | 1454.8118 | 3101.3476 |
| 3212.9628 | 3213.1629 |           |           |           |           |           |

### S.18.11 (CH<sub>3</sub>)<sub>2</sub>S in ether

Cartesian coordinates (standard orientation)

|   |           |           |           |
|---|-----------|-----------|-----------|
| C | -1.379625 | 0.511253  | 0.000030  |
| H | -1.357268 | 1.135258  | -0.895005 |
| H | -2.295875 | -0.079574 | 0.000293  |
| H | -1.356549 | 1.135899  | 0.894450  |
| C | 1.379631  | 0.511251  | 0.000058  |
| H | 2.295879  | -0.079578 | -0.001106 |
| H | 1.356473  | 1.136018  | -0.894432 |
| H | 1.357341  | 1.135129  | 0.895027  |
| S | -0.000002 | -0.657386 | 0.000015  |

SCF energy : -477.981078641

Gibbs free energy: -477.932610

Frequencies

|           |           |           |           |           |           |           |
|-----------|-----------|-----------|-----------|-----------|-----------|-----------|
| 192.2525  | 198.2836  | 267.3110  | 702.1191  | 752.7408  | 911.2548  | 947.4718  |
| 981.0925  | 1035.9690 | 1314.4607 | 1336.2158 | 1435.6346 | 1444.2830 | 1450.5349 |
| 1457.0202 | 3043.6091 | 3047.5640 | 3129.9437 | 3138.4306 | 3157.5188 | 3158.8868 |

### S.18.12 CH<sub>3</sub><sup>+</sup> in ether

Cartesian coordinates (standard orientation)

|   |           |           |           |
|---|-----------|-----------|-----------|
| C | 0.000020  | 0.000028  | -0.000016 |
| H | -0.226603 | 1.062690  | 0.000031  |
| H | -0.807441 | -0.727570 | 0.000031  |
| H | 1.033923  | -0.335287 | 0.000031  |

SCF energy : -39.5442704569

Gibbs free energy: -39.531935

Frequencies

|           |           |           |           |           |           |
|-----------|-----------|-----------|-----------|-----------|-----------|
| 1383.4047 | 1390.7371 | 1405.1683 | 3065.8931 | 3266.2080 | 3274.5851 |
|-----------|-----------|-----------|-----------|-----------|-----------|

## S.19 Selected cluster geometries in anisole

### S.19.1 (CH<sub>3</sub>)<sub>3</sub>S<sup>+</sup> in anisole

Cartesian coordinates (input orientation)

|   |           |           |           |
|---|-----------|-----------|-----------|
| C | 0.003536  | 1.612013  | 0.263269  |
| H | 0.006255  | 1.491965  | 1.344511  |
| H | 0.895393  | 2.129396  | -0.084146 |
| H | -0.887766 | 2.133541  | -0.079736 |
| C | -1.396942 | -0.801532 | 0.272856  |
| H | -1.381589 | -1.844766 | -0.036432 |
| H | -1.304335 | -0.704743 | 1.352451  |

|   |           |           |           |
|---|-----------|-----------|-----------|
| H | -2.296497 | -0.312988 | -0.096214 |
| C | 1.392360  | -0.811200 | 0.259640  |
| H | 1.422273  | -1.827425 | -0.128369 |
| H | 2.284720  | -0.267653 | -0.044338 |
| H | 1.265601  | -0.797000 | 1.340132  |
| S | -0.003009 | 0.000393  | -0.529664 |

SCF energy : -517.674818317

Gibbs free energy: -517.588283

#### Frequencies

|           |           |           |           |           |           |           |
|-----------|-----------|-----------|-----------|-----------|-----------|-----------|
| 154.3740  | 183.9771  | 251.9873  | 288.4526  | 300.6323  | 344.6003  | 652.7626  |
| 733.6147  | 741.7436  | 902.5643  | 941.0891  | 944.2933  | 1031.7493 | 1055.4436 |
| 1069.2650 | 1325.6693 | 1329.8219 | 1358.5550 | 1416.6863 | 1425.3976 | 1431.0495 |
| 1440.0468 | 1449.9157 | 1461.3670 | 3075.5250 | 3088.8954 | 3097.9173 | 3187.8118 |
| 3200.5256 | 3202.7838 | 3210.4475 | 3210.9584 | 3218.3959 |           |           |

### S.19.2 Tripod ion pair in anisole

#### Cartesian coordinates (standard orientation)

|    |           |           |           |
|----|-----------|-----------|-----------|
| C  | 0.721782  | 1.606500  | -0.159188 |
| H  | -0.361777 | 1.469603  | -0.148795 |
| H  | 1.071613  | 2.204139  | 0.680839  |
| H  | 1.076889  | 2.035955  | -1.094433 |
| C  | 0.688360  | -0.942017 | -1.307901 |
| H  | 1.033255  | -1.970620 | -1.215152 |
| H  | -0.391970 | -0.850523 | -1.171963 |
| H  | 1.024610  | -0.520112 | -2.253446 |
| C  | 0.708525  | -0.664814 | 1.468384  |
| H  | 1.046968  | -1.694409 | 1.570874  |
| H  | 1.064694  | -0.070641 | 2.307975  |
| H  | -0.373666 | -0.594067 | 1.336642  |
| S  | 1.506272  | -0.006575 | -0.004770 |
| Cl | -2.470763 | 0.005757  | 0.003294  |

SCF energy : -978.093363534

Gibbs free energy: -978.010546

#### Frequencies

|           |           |           |           |           |           |           |
|-----------|-----------|-----------|-----------|-----------|-----------|-----------|
| 91.5809   | 102.2703  | 125.5561  | 213.0587  | 241.9124  | 258.4606  | 282.0126  |
| 285.3652  | 319.6377  | 651.8890  | 725.1684  | 731.7776  | 913.4474  | 959.4523  |
| 961.7198  | 1059.6761 | 1063.0033 | 1073.3973 | 1323.8531 | 1325.1208 | 1363.6380 |
| 1419.2822 | 1423.9492 | 1438.6266 | 1447.5218 | 1454.5523 | 1456.5096 | 3038.8519 |
| 3042.3253 | 3051.6587 | 3172.2788 | 3173.8206 | 3176.7841 | 3195.6915 | 3203.3504 |
| 3204.9267 |           |           |           |           |           |           |

### S.19.3 Linear transition state in anisole

Cartesian coordinates (standard orientation)

|    |           |           |           |
|----|-----------|-----------|-----------|
| C  | -1.963535 | 1.388746  | 0.466981  |
| H  | -1.434136 | 1.335958  | 1.418357  |
| H  | -1.682620 | 2.296077  | -0.065538 |
| H  | -3.040470 | 1.378979  | 0.627408  |
| C  | -1.963698 | -1.388676 | 0.467013  |
| H  | -1.682862 | -2.296047 | -0.065477 |
| H  | -1.434313 | -1.335919 | 1.418398  |
| H  | -3.040637 | -1.378794 | 0.627421  |
| C  | 0.793318  | -0.000041 | -0.248449 |
| H  | 0.903829  | -0.929314 | -0.778088 |
| H  | 0.903830  | 0.929210  | -0.778127 |
| H  | 0.660749  | -0.000016 | 0.819027  |
| S  | -1.507061 | -0.000005 | -0.589466 |
| Cl | 3.103711  | -0.000013 | 0.123224  |

SCF energy : -978.054402556

Gibbs free energy: -977.976798

Frequencies

|           |           |           |           |           |           |           |
|-----------|-----------|-----------|-----------|-----------|-----------|-----------|
| -575.4942 | 27.3739   | 66.3059   | 68.5567   | 131.5320  | 181.4162  | 228.9164  |
| 252.8408  | 266.2755  | 297.0291  | 703.2038  | 753.9411  | 913.8985  | 938.7024  |
| 965.6849  | 996.5898  | 997.7830  | 1038.5151 | 1048.5512 | 1318.8110 | 1347.2996 |
| 1354.6420 | 1363.2803 | 1432.6857 | 1434.8891 | 1449.5825 | 1453.1852 | 3069.4299 |
| 3073.0213 | 3171.1991 | 3172.2652 | 3174.6458 | 3187.9519 | 3188.4136 | 3380.3573 |
| 3381.5936 |           |           |           |           |           |           |

### S.19.4 Immediate product cluster in anisole

Cartesian coordinates (standard orientation)

|    |           |           |           |
|----|-----------|-----------|-----------|
| C  | -1.804824 | 1.422083  | 0.504366  |
| H  | -0.931127 | 1.248111  | 1.134938  |
| H  | -1.632208 | 2.305953  | -0.109013 |
| H  | -2.686188 | 1.584816  | 1.125520  |
| C  | -2.339235 | -1.283338 | 0.578255  |
| H  | -2.508665 | -2.199526 | 0.013484  |
| H  | -1.462989 | -1.412909 | 1.215416  |
| H  | -3.217135 | -1.072309 | 1.190055  |
| C  | 1.621692  | -0.180963 | -0.346118 |
| H  | 1.570370  | -0.894087 | -1.163418 |
| H  | 1.258113  | 0.792234  | -0.662046 |
| H  | 1.062583  | -0.539788 | 0.513285  |
| S  | -2.067539 | 0.036927  | -0.626987 |
| Cl | 3.338946  | -0.008825 | 0.138503  |

SCF energy : -978.095120197  
Gibbs free energy: -978.017298

Frequencies

|           |           |           |           |           |           |           |
|-----------|-----------|-----------|-----------|-----------|-----------|-----------|
| 52.5047   | 67.2665   | 79.2531   | 81.0226   | 103.6794  | 122.7083  | 190.2448  |
| 195.6520  | 277.1872  | 705.3244  | 729.9170  | 759.0600  | 913.4125  | 954.9395  |
| 988.0930  | 1029.5419 | 1038.0671 | 1055.8506 | 1320.9936 | 1344.6620 | 1362.2025 |
| 1436.5918 | 1445.4132 | 1448.6237 | 1452.5218 | 1456.2422 | 1463.7248 | 3057.3369 |
| 3060.8645 | 3107.1117 | 3141.1984 | 3149.5721 | 3169.5902 | 3172.6604 | 3217.9877 |
| 3221.2398 |           |           |           |           |           |           |

**S.19.5 CH<sub>3</sub>Cl in anisole**

Cartesian coordinates (standard orientation)

|    |           |           |           |
|----|-----------|-----------|-----------|
| C  | 0.000000  | 0.000000  | -1.132188 |
| H  | 0.000000  | 1.033168  | -1.467991 |
| H  | 0.894750  | -0.516584 | -1.467991 |
| H  | -0.894750 | -0.516584 | -1.467991 |
| Cl | 0.000000  | 0.000000  | 0.658653  |

SCF energy : -500.111948040  
Gibbs free energy: -500.096804

Frequencies

|           |           |           |           |           |           |           |
|-----------|-----------|-----------|-----------|-----------|-----------|-----------|
| 728.6426  | 1030.4573 | 1030.9816 | 1358.9278 | 1454.7466 | 1455.1065 | 3098.2761 |
| 3210.0467 | 3210.2503 |           |           |           |           |           |

**S.19.6 (CH<sub>3</sub>)<sub>2</sub>S in anisole**

Cartesian coordinates (standard orientation)

|   |           |           |           |
|---|-----------|-----------|-----------|
| C | -1.379632 | 0.511305  | 0.000045  |
| H | -1.356452 | 1.135939  | -0.894216 |
| H | -2.295844 | -0.078953 | -0.000632 |
| H | -1.356773 | 1.135459  | 0.894485  |
| C | 1.379638  | 0.511303  | 0.000045  |
| H | 2.295846  | -0.078959 | -0.000723 |
| H | 1.356405  | 1.135998  | -0.894171 |
| H | 1.356821  | 1.135389  | 0.894532  |
| S | -0.000002 | -0.657533 | 0.000012  |

SCF energy : -477.981064877  
Gibbs free energy: -477.932478

Frequencies

|           |           |           |           |           |           |           |
|-----------|-----------|-----------|-----------|-----------|-----------|-----------|
| 188.0115  | 209.6152  | 274.9628  | 701.6044  | 751.8826  | 911.8615  | 946.8840  |
| 983.7308  | 1039.1499 | 1314.2588 | 1338.6103 | 1434.4903 | 1445.3822 | 1448.5248 |
| 1455.6760 | 3047.7820 | 3050.9631 | 3132.4960 | 3140.6828 | 3161.6211 | 3162.9584 |

**S.19.7 CH<sub>3</sub><sup>+</sup> in anisole**

Cartesian coordinates (standard orientation)

|   |           |           |           |
|---|-----------|-----------|-----------|
| C | 0.000020  | 0.000028  | -0.000016 |
| H | -0.226907 | 1.062629  | 0.000032  |
| H | -0.807236 | -0.727804 | 0.000031  |
| H | 1.034023  | -0.334994 | 0.000031  |

SCF energy : -39.5441703013

Gibbs free energy: -39.531835

Frequencies

|           |           |           |           |           |           |
|-----------|-----------|-----------|-----------|-----------|-----------|
| 1383.4810 | 1390.9785 | 1405.1364 | 3065.8130 | 3266.1152 | 3274.5245 |
|-----------|-----------|-----------|-----------|-----------|-----------|

**S.20 Selected cluster geometries in ethyl phenyl ether**

**S.20.1 (CH<sub>3</sub>)S<sup>+</sup> in ethyl phenyl ether**

Cartesian coordinates (input orientation)

|   |           |           |           |
|---|-----------|-----------|-----------|
| C | 0.003555  | 1.611990  | 0.263256  |
| H | 0.006278  | 1.491968  | 1.344504  |
| H | 0.895414  | 2.129365  | -0.084170 |
| H | -0.887737 | 2.133540  | -0.079752 |
| C | -1.396999 | -0.801506 | 0.272900  |
| H | -1.381638 | -1.844798 | -0.036204 |
| H | -1.304496 | -0.704536 | 1.352490  |
| H | -2.296541 | -0.313041 | -0.096322 |
| C | 1.392394  | -0.811224 | 0.259611  |
| H | 1.422534  | -1.827357 | -0.128633 |
| H | 2.284696  | -0.267464 | -0.044173 |
| H | 1.265564  | -0.797287 | 1.340102  |
| S | -0.003025 | 0.000349  | -0.529649 |

SCF energy : -517.674599456

Gibbs free energy: -517.588076

Frequencies

|          |          |          |          |          |           |           |
|----------|----------|----------|----------|----------|-----------|-----------|
| 154.2453 | 182.3383 | 251.9165 | 288.6109 | 300.6119 | 344.7125  | 652.6733  |
| 733.5876 | 741.7147 | 902.5869 | 940.9597 | 944.2742 | 1031.5258 | 1055.2847 |

|           |           |           |           |           |           |           |
|-----------|-----------|-----------|-----------|-----------|-----------|-----------|
| 1069.2502 | 1325.5628 | 1329.8592 | 1358.3534 | 1416.6925 | 1425.4347 | 1431.0744 |
| 1440.0205 | 1449.9553 | 1461.4102 | 3075.4802 | 3088.8619 | 3097.8907 | 3187.7551 |
| 3200.4791 | 3202.7172 | 3210.4204 | 3210.9456 | 3218.3757 |           |           |

### S.20.2 Tripod ion pair in ethyl phenyl ether

Cartesian coordinates (standard orientation)

|    |           |           |           |
|----|-----------|-----------|-----------|
| C  | 0.686066  | -0.492729 | 1.534308  |
| H  | -0.394499 | -0.460335 | 1.374505  |
| H  | 1.043288  | -1.495268 | 1.763967  |
| H  | 1.012796  | 0.204173  | 2.304196  |
| C  | 0.693403  | 1.576169  | -0.342988 |
| H  | 1.048407  | 1.897522  | -1.320681 |
| H  | -0.387944 | 1.420720  | -0.321370 |
| H  | 1.027305  | 2.275383  | 0.421741  |
| C  | 0.723108  | -1.086322 | -1.192938 |
| H  | 1.087748  | -0.783658 | -2.173055 |
| H  | 1.066174  | -2.093733 | -0.963299 |
| H  | -0.360727 | -0.985495 | -1.101889 |
| S  | 1.501144  | 0.006352  | 0.008494  |
| Cl | -2.457430 | -0.003744 | -0.006489 |

SCF energy : -978.093254962

Gibbs free energy: -978.010244

Frequencies

|           |           |           |           |           |           |           |
|-----------|-----------|-----------|-----------|-----------|-----------|-----------|
| 98.8954   | 107.4111  | 127.8035  | 223.6220  | 250.7465  | 260.1100  | 271.7965  |
| 281.4125  | 319.1623  | 648.6500  | 725.0675  | 728.4490  | 909.5494  | 959.1712  |
| 964.0474  | 1057.3795 | 1060.2407 | 1075.1735 | 1320.6568 | 1323.9411 | 1359.8075 |
| 1422.0485 | 1422.8911 | 1437.2116 | 1446.2954 | 1451.5775 | 1455.6504 | 3040.3811 |
| 3044.9327 | 3050.3953 | 3176.4986 | 3177.6032 | 3178.7123 | 3202.4983 | 3206.8964 |
| 3211.5310 |           |           |           |           |           |           |

### S.20.3 Linear transition state in ethyl phenyl ether

Cartesian coordinates (standard orientation)

|   |           |           |           |
|---|-----------|-----------|-----------|
| C | -1.963153 | 1.388726  | 0.467085  |
| H | -1.433514 | 1.335879  | 1.418327  |
| H | -1.682326 | 2.296066  | -0.065465 |
| H | -3.040051 | 1.378996  | 0.627763  |
| C | -1.963301 | -1.388662 | 0.467114  |
| H | -1.682552 | -2.296039 | -0.065414 |
| H | -1.433666 | -1.335848 | 1.418361  |
| H | -3.040200 | -1.378824 | 0.627784  |
| C | 0.792730  | -0.000037 | -0.248710 |
| H | 0.903648  | -0.929286 | -0.778313 |

|    |           |           |           |
|----|-----------|-----------|-----------|
| H  | 0.903643  | 0.929212  | -0.778314 |
| H  | 0.660524  | -0.000035 | 0.818814  |
| S  | -1.506959 | -0.000005 | -0.589494 |
| Cl | 3.103422  | -0.000012 | 0.123260  |

SCF energy : -978.054316887

Gibbs free energy: -977.976662

Frequencies

|           |           |           |           |           |           |           |
|-----------|-----------|-----------|-----------|-----------|-----------|-----------|
| -575.0736 | 28.3952   | 67.2465   | 68.7202   | 131.3813  | 181.4969  | 228.6808  |
| 252.9697  | 266.3696  | 296.9899  | 703.2093  | 753.9368  | 913.8990  | 938.7212  |
| 965.6945  | 996.6281  | 997.9020  | 1038.5619 | 1048.5208 | 1318.8378 | 1347.2763 |
| 1354.6843 | 1363.3108 | 1432.6950 | 1434.9115 | 1449.5746 | 1453.1913 | 3069.4316 |
| 3073.0332 | 3171.2093 | 3172.2366 | 3174.6447 | 3187.9702 | 3188.4416 | 3380.2741 |
| 3381.5572 |           |           |           |           |           |           |

**S.20.4 Immediate product cluster in ethyl phenyl ether**

Cartesian coordinates (standard orientation)

|    |           |           |           |
|----|-----------|-----------|-----------|
| C  | -1.805192 | 1.422085  | 0.504362  |
| H  | -0.931547 | 1.248350  | 1.135075  |
| H  | -1.632699 | 2.305989  | -0.109005 |
| H  | -2.686688 | 1.584641  | 1.125378  |
| C  | -2.339047 | -1.283411 | 0.578237  |
| H  | -2.508189 | -2.199655 | 0.013469  |
| H  | -1.462892 | -1.412799 | 1.215568  |
| H  | -3.217105 | -1.072556 | 1.189873  |
| C  | 1.621693  | -0.180838 | -0.346068 |
| H  | 1.570280  | -0.893923 | -1.163398 |
| H  | 1.258127  | 0.792376  | -0.661957 |
| H  | 1.062573  | -0.539674 | 0.513327  |
| S  | -2.067411 | 0.036856  | -0.627007 |
| Cl | 3.338941  | -0.008792 | 0.138506  |

SCF energy : -978.095102048

Gibbs free energy: -978.017294

Frequencies

|           |           |           |           |           |           |           |
|-----------|-----------|-----------|-----------|-----------|-----------|-----------|
| 52.2507   | 67.2003   | 79.2047   | 80.9017   | 103.5684  | 122.1414  | 190.1599  |
| 195.5845  | 277.1774  | 705.3261  | 729.9733  | 759.0550  | 913.4005  | 954.9240  |
| 988.0903  | 1029.5237 | 1038.0690 | 1055.7992 | 1321.0070 | 1344.6751 | 1362.2135 |
| 1436.6248 | 1445.4395 | 1448.6244 | 1452.5662 | 1456.2744 | 1463.6914 | 3057.3260 |
| 3060.8463 | 3107.1037 | 3141.1712 | 3149.5382 | 3169.5847 | 3172.6711 | 3217.9530 |
| 3221.2285 |           |           |           |           |           |           |



### S.20.5 CH<sub>3</sub>Cl in ethyl phenyl ether

Cartesian coordinates (standard orientation)

|    |           |           |           |
|----|-----------|-----------|-----------|
| C  | 0.000000  | 0.000000  | -1.132163 |
| H  | 0.000000  | 1.033164  | -1.467990 |
| H  | 0.894746  | -0.516582 | -1.467990 |
| H  | -0.894746 | -0.516582 | -1.467990 |
| Cl | 0.000000  | 0.000000  | 0.658644  |

SCF energy : -500.111938403

Gibbs free energy: -500.096794

728.7100 1030.4617 1030.9834 1358.9491 1454.7917 1455.1522 3098.2532  
3210.0065 3210.2103

### S.20.6 (CH<sub>3</sub>)<sub>2</sub>S in ethyl phenyl ether

Cartesian coordinates (standard orientation)

|   |           |           |           |
|---|-----------|-----------|-----------|
| C | -1.379613 | 0.511310  | 0.000045  |
| H | -1.356450 | 1.135944  | -0.894219 |
| H | -2.295830 | -0.078942 | -0.000629 |
| H | -1.356768 | 1.135470  | 0.894485  |
| C | 1.379618  | 0.511309  | 0.000045  |
| H | 2.295832  | -0.078948 | -0.000720 |
| H | 1.356402  | 1.136003  | -0.894174 |
| H | 1.356816  | 1.135400  | 0.894533  |
| S | -0.000002 | -0.657540 | 0.000012  |

SCF energy : -477.981053363

Gibbs free energy: -477.932466

Frequencies

188.0226 209.6079 274.9663 701.6288 751.9027 911.8517 946.8767  
983.7403 1039.1563 1314.2714 1338.6267 1434.5223 1445.4173 1448.5557  
1455.7207 3047.7627 3050.9444 3132.4609 3140.6509 3161.6089 3162.9445

### S.20.7 CH<sub>3</sub><sup>+</sup> in ethyl phenyl ether

Cartesian coordinates (standard orientation)

|   |           |           |           |
|---|-----------|-----------|-----------|
| C | 0.000020  | 0.000028  | -0.000016 |
| H | -0.227821 | 1.062447  | 0.000032  |
| H | -0.806621 | -0.728505 | 0.000032  |
| H | 1.034322  | -0.334113 | 0.000032  |

SCF energy : -39.5438714737

Gibbs free energy: -39.531536

## Frequencies

1383.7022 1391.7194 1405.0418 3065.5753 3265.8392 3274.3466

## S.21 Selected cluster geometries in diphenyl ether

### S.21.1 $(\text{CH}_3)_3\text{S}^+$ in diphenyl ether

#### Cartesian coordinates (input orientation)

|   |           |           |           |
|---|-----------|-----------|-----------|
| C | 0.003732  | 1.611731  | 0.263118  |
| H | 0.006494  | 1.492040  | 1.344436  |
| H | 0.895607  | 2.129048  | -0.084433 |
| H | -0.887442 | 2.133511  | -0.079944 |
| C | -1.397638 | -0.801232 | 0.273354  |
| H | -1.382338 | -1.845107 | -0.033914 |
| H | -1.306221 | -0.702471 | 1.352903  |
| H | -2.297006 | -0.313484 | -0.097416 |
| C | 1.392810  | -0.811484 | 0.259327  |
| H | 1.425379  | -1.826660 | -0.131324 |
| H | 2.284484  | -0.265483 | -0.042496 |
| H | 1.265321  | -0.800256 | 1.339812  |
| S | -0.003182 | -0.000153 | -0.529464 |

SCF energy : -517.672123536

Gibbs free energy: -517.585745

## Frequencies

149.8942 166.3277 251.3432 290.0033 300.1788 345.6814 651.7057  
733.2788 741.3816 902.8325 939.1956 944.4161 1029.1930 1053.4420  
1068.9961 1324.3967 1330.2616 1356.2409 1416.6997 1425.9099 1431.3395  
1439.7401 1450.3031 1461.7676 3075.0107 3088.4756 3097.5617 3187.1871  
3199.9854 3202.0387 3210.0768 3210.7573 3218.2022

### S.21.2 Tripod ion pair in diphenyl ether

#### Cartesian coordinates (standard orientation)

|   |           |           |           |
|---|-----------|-----------|-----------|
| C | 0.678136  | -1.276065 | -0.985030 |
| H | -0.402213 | -1.152161 | -0.873733 |
| H | 1.007140  | -1.149872 | -2.014950 |
| H | 1.030005  | -2.230462 | -0.596158 |
| C | 0.741666  | -0.221106 | 1.597306  |
| H | 1.076051  | 0.609228  | 2.216852  |
| H | -0.343363 | -0.233872 | 1.470894  |
| H | 1.125464  | -1.159718 | 1.993591  |
| C | 0.674460  | 1.494989  | -0.604068 |
| H | 1.085923  | 2.322850  | -0.029180 |

|    |           |           |           |
|----|-----------|-----------|-----------|
| H  | 0.937534  | 1.604357  | -1.654737 |
| H  | -0.401711 | 1.373235  | -0.456933 |
| S  | 1.499041  | 0.004508  | -0.021287 |
| Cl | -2.450886 | -0.002508 | 0.013865  |

SCF energy : -978.091657471

Gibbs free energy: -978.008524

#### Frequencies

|           |           |           |           |           |           |           |
|-----------|-----------|-----------|-----------|-----------|-----------|-----------|
| 101.6025  | 114.7676  | 133.6391  | 222.3377  | 236.6744  | 263.8618  | 277.8843  |
| 290.9387  | 323.9731  | 651.1277  | 724.6379  | 733.8025  | 913.4033  | 961.5921  |
| 965.2496  | 1059.2290 | 1063.7095 | 1075.2509 | 1324.1657 | 1326.5172 | 1363.9065 |
| 1420.8066 | 1424.7461 | 1441.0372 | 1448.4874 | 1455.2002 | 1458.7467 | 3032.4123 |
| 3036.9814 | 3047.4101 | 3166.6372 | 3170.8598 | 3173.5996 | 3193.9472 | 3200.1512 |
| 3204.7431 |           |           |           |           |           |           |

### S.21.3 Linear transition state in diphenyl ether

#### Cartesian coordinates (standard orientation)

|    |           |           |           |
|----|-----------|-----------|-----------|
| C  | -1.958876 | 1.388506  | 0.468241  |
| H  | -1.426548 | 1.335001  | 1.417984  |
| H  | -1.679022 | 2.295955  | -0.064658 |
| H  | -3.035347 | 1.379197  | 0.631727  |
| C  | -1.958883 | -1.388500 | 0.468244  |
| H  | -1.679103 | -2.295946 | -0.064696 |
| H  | -1.426486 | -1.335044 | 1.417952  |
| H  | -3.035344 | -1.379144 | 0.631812  |
| C  | 0.786119  | -0.000005 | -0.251638 |
| H  | 0.901611  | -0.929038 | -0.780750 |
| H  | 0.901583  | 0.929159  | -0.780530 |
| H  | 0.658044  | -0.000132 | 0.816419  |
| S  | -1.505805 | -0.000001 | -0.589796 |
| Cl | 3.100196  | 0.000000  | 0.123670  |

SCF energy : -978.053354454

Gibbs free energy: -977.975284

#### Frequencies

|           |           |           |           |           |           |           |
|-----------|-----------|-----------|-----------|-----------|-----------|-----------|
| -570.1580 | 36.6794   | 71.1655   | 77.3675   | 130.4294  | 182.4485  | 226.1448  |
| 254.4597  | 267.4551  | 296.5766  | 703.2732  | 753.8966  | 913.9029  | 938.9829  |
| 965.8941  | 997.4066  | 999.3085  | 1039.3058 | 1048.1955 | 1319.1610 | 1347.0577 |
| 1355.1469 | 1363.6415 | 1432.7971 | 1435.2525 | 1449.4770 | 1453.3058 | 3069.5126 |
| 3073.1902 | 3171.3789 | 3171.8648 | 3174.7178 | 3188.1887 | 3188.7563 | 3379.3517 |
| 3381.1139 |           |           |           |           |           |           |

### S.21.4 Immediate product cluster in diphenyl ether

Cartesian coordinates (standard orientation)

|    |           |           |           |
|----|-----------|-----------|-----------|
| C  | -1.841855 | 1.424087  | 0.502043  |
| H  | -0.978706 | 1.268214  | 1.151611  |
| H  | -1.672015 | 2.308609  | -0.111097 |
| H  | -2.738533 | 1.574263  | 1.104135  |
| C  | -2.326333 | -1.290277 | 0.576042  |
| H  | -2.470105 | -2.211041 | 0.011658  |
| H  | -1.459247 | -1.402903 | 1.228940  |
| H  | -3.218300 | -1.092742 | 1.171755  |
| C  | 1.622032  | -0.173968 | -0.336006 |
| H  | 1.557937  | -0.924679 | -1.118208 |
| H  | 1.270832  | 0.788294  | -0.697081 |
| H  | 1.059363  | -0.482963 | 0.540382  |
| S  | -2.056338 | 0.030464  | -0.628891 |
| Cl | 3.342772  | -0.004208 | 0.136923  |

SCF energy : -978.094897643

Gibbs free energy: -978.016869

Frequencies

|           |           |           |           |           |           |           |
|-----------|-----------|-----------|-----------|-----------|-----------|-----------|
| 50.1785   | 72.3806   | 74.8421   | 90.9829   | 107.7890  | 143.1618  | 182.8810  |
| 196.4604  | 276.6902  | 705.0335  | 730.0832  | 758.5239  | 912.9385  | 953.5700  |
| 986.8466  | 1029.9711 | 1037.8964 | 1060.9892 | 1320.4852 | 1344.0007 | 1364.4816 |
| 1436.9902 | 1445.5929 | 1448.9997 | 1454.7295 | 1456.8699 | 1462.7164 | 3058.3597 |
| 3061.4284 | 3099.5631 | 3141.8891 | 3149.8049 | 3170.0479 | 3174.1125 | 3211.2109 |
| 3214.4081 |           |           |           |           |           |           |

### S.21.5 CH<sub>3</sub>Cl in diphenyl ether

Cartesian coordinates (standard orientation)

|    |           |           |           |
|----|-----------|-----------|-----------|
| C  | 0.000000  | 0.000000  | -1.131888 |
| H  | 0.000000  | 1.033109  | -1.467973 |
| H  | 0.894699  | -0.516555 | -1.467973 |
| H  | -0.894699 | -0.516555 | -1.467973 |
| Cl | 0.000000  | 0.000000  | 0.658544  |

SCF energy : -500.111830973

Gibbs free energy: -500.096684

Frequencies

|           |           |           |           |           |           |           |
|-----------|-----------|-----------|-----------|-----------|-----------|-----------|
| 729.4637  | 1030.5095 | 1031.0030 | 1359.1862 | 1455.2921 | 1455.6576 | 3097.9985 |
| 3209.5577 | 3209.7635 |           |           |           |           |           |

### S.21.6 (CH<sub>3</sub>)<sub>2</sub>S in diphenyl ether

Cartesian coordinates (standard orientation)

|   |           |           |           |
|---|-----------|-----------|-----------|
| C | -1.379400 | 0.511370  | 0.000045  |
| H | -1.356421 | 1.136003  | -0.894261 |
| H | -2.295672 | -0.078814 | -0.000595 |
| H | -1.356711 | 1.135585  | 0.894487  |
| C | 1.379405  | 0.511368  | 0.000045  |
| H | 2.295675  | -0.078820 | -0.000687 |
| H | 1.356373  | 1.136062  | -0.894216 |
| H | 1.356759  | 1.135515  | 0.894535  |
| S | -0.000002 | -0.657622 | 0.000012  |

SCF energy : -477.980925595

Gibbs free energy: -477.932336

Frequencies

|           |           |           |           |           |           |           |
|-----------|-----------|-----------|-----------|-----------|-----------|-----------|
| 188.1582  | 209.4746  | 274.9740  | 701.8990  | 752.1260  | 911.7432  | 946.7976  |
| 983.8305  | 1039.2170 | 1314.4105 | 1338.7971 | 1434.8763 | 1445.7960 | 1448.9029 |
| 1456.2125 | 3047.5475 | 3050.7374 | 3132.0701 | 3140.2972 | 3161.4725 | 3162.7899 |

### S.21.7 CH<sub>3</sub><sup>+</sup> in diphenyl ether

Cartesian coordinates (standard orientation)

|   |           |           |           |
|---|-----------|-----------|-----------|
| C | 0.000019  | 0.000032  | -0.000018 |
| H | -0.238805 | 1.060185  | 0.000035  |
| H | -0.799159 | -0.736897 | 0.000035  |
| H | 1.037850  | -0.323477 | 0.000035  |

SCF energy : -39.5404887448

Gibbs free energy: -39.528169

Frequencies

|           |           |           |           |           |           |
|-----------|-----------|-----------|-----------|-----------|-----------|
| 1383.9059 | 1396.2311 | 1402.9862 | 3062.3383 | 3262.2745 | 3271.5266 |
|-----------|-----------|-----------|-----------|-----------|-----------|

## S.22 Selected cluster geometries in diethyl amine

### S.22.1 (CH<sub>3</sub>)<sub>3</sub>S<sup>+</sup> in diethyl amine

Cartesian coordinates (input orientation)

|   |           |           |           |
|---|-----------|-----------|-----------|
| C | 0.003791  | 1.611632  | 0.263068  |
| H | 0.006564  | 1.492083  | 1.344415  |
| H | 0.895664  | 2.128939  | -0.084534 |
| H | -0.887344 | 2.133489  | -0.080021 |
| C | -1.397892 | -0.801135 | 0.273518  |
| H | -1.382683 | -1.845210 | -0.033127 |
| H | -1.306875 | -0.701765 | 1.353056  |

|   |           |           |           |
|---|-----------|-----------|-----------|
| H | -2.297178 | -0.313598 | -0.097799 |
| C | 1.392992  | -0.811579 | 0.259232  |
| H | 1.426465  | -1.826414 | -0.132271 |
| H | 2.284425  | -0.264765 | -0.041916 |
| H | 1.265304  | -0.801322 | 1.339718  |
| S | -0.003234 | -0.000354 | -0.529380 |

SCF energy : -517.671137182

Gibbs free energy: -517.584820

#### Frequencies

|           |           |           |           |           |           |           |
|-----------|-----------|-----------|-----------|-----------|-----------|-----------|
| 145.6068  | 162.6267  | 251.2077  | 290.3464  | 299.9316  | 345.9355  | 651.3436  |
| 733.1533  | 741.2470  | 902.9361  | 938.4555  | 944.5500  | 1028.3662 | 1052.7046 |
| 1068.8476 | 1323.9661 | 1330.4230 | 1355.4982 | 1416.7035 | 1426.1300 | 1431.4429 |
| 1439.6274 | 1450.4020 | 1461.8546 | 3074.8536 | 3088.3268 | 3097.4242 | 3186.9904 |
| 3199.8021 | 3201.7838 | 3209.9130 | 3210.6654 | 3218.1063 |           |           |

### S.22.2 Tripod ion pair in diethyl amine

#### Cartesian coordinates (standard orientation)

|    |           |           |           |
|----|-----------|-----------|-----------|
| C  | 0.695855  | -1.341518 | -0.895860 |
| H  | -0.386254 | -1.209886 | -0.817594 |
| H  | 1.049384  | -1.283631 | -1.923944 |
| H  | 1.035181  | -2.268919 | -0.437626 |
| C  | 0.692295  | -0.105939 | 1.608838  |
| H  | 1.027267  | 0.757833  | 2.180572  |
| H  | -0.389547 | -0.107566 | 1.453380  |
| H  | 1.048000  | -1.022724 | 2.076050  |
| C  | 0.703379  | 1.447541  | -0.712694 |
| H  | 1.055402  | 2.306162  | -0.143124 |
| H  | 1.049428  | 1.517035  | -1.742665 |
| H  | -0.379461 | 1.316764  | -0.644911 |
| S  | 1.497469  | -0.002028 | 0.001625  |
| Cl | -2.448122 | 0.001581  | -0.001638 |

SCF energy : -978.091091487

Gibbs free energy: -978.008895

#### Frequencies

|           |           |           |           |           |           |           |
|-----------|-----------|-----------|-----------|-----------|-----------|-----------|
| 77.0067   | 95.4526   | 124.1692  | 209.0511  | 231.4425  | 240.4519  | 270.4650  |
| 286.2614  | 316.6343  | 648.2886  | 722.0080  | 731.0091  | 910.2972  | 956.7548  |
| 959.1361  | 1056.6817 | 1059.5757 | 1072.2831 | 1317.5118 | 1322.9637 | 1359.6754 |
| 1416.1395 | 1420.5782 | 1437.9185 | 1443.0430 | 1453.4055 | 1458.5876 | 3032.9666 |
| 3036.4699 | 3042.2463 | 3167.9927 | 3170.1272 | 3172.6754 | 3195.9799 | 3198.5115 |
| 3204.1690 |           |           |           |           |           |           |

### S.22.3 Linear transition state in diethyl amine

Cartesian coordinates (standard orientation)

|    |           |           |           |
|----|-----------|-----------|-----------|
| C  | 1.957208  | -1.388424 | 0.468687  |
| H  | 1.423838  | -1.334664 | 1.417846  |
| H  | 1.677725  | -2.295913 | -0.064347 |
| H  | 3.033513  | -1.379280 | 0.633256  |
| C  | 1.957169  | 1.388437  | 0.468682  |
| H  | 1.677760  | 2.295911  | -0.064414 |
| H  | 1.423706  | 1.334731  | 1.417793  |
| H  | 3.033459  | 1.379266  | 0.633362  |
| C  | -0.783512 | -0.000006 | -0.252787 |
| H  | -0.900813 | 0.928955  | -0.781673 |
| H  | -0.900785 | -0.929113 | -0.781428 |
| H  | -0.657099 | 0.000135  | 0.815481  |
| S  | 1.505341  | 0.000000  | -0.589905 |
| Cl | -3.098938 | -0.000004 | 0.123830  |

SCF energy : -978.052974419

Gibbs free energy: -977.974777

Frequencies

|           |           |           |           |           |           |           |
|-----------|-----------|-----------|-----------|-----------|-----------|-----------|
| -568.1252 | 39.1304   | 72.3661   | 80.8939   | 130.4556  | 182.8419  | 225.2220  |
| 255.0652  | 267.8949  | 296.4299  | 703.2990  | 753.8848  | 913.9021  | 939.1050  |
| 966.0164  | 997.8828  | 999.8925  | 1039.7056 | 1048.0798 | 1319.2965 | 1346.9956 |
| 1355.3174 | 1363.7662 | 1432.8413 | 1435.4243 | 1449.4378 | 1453.3734 | 3069.5746 |
| 3073.2623 | 3171.4718 | 3171.7002 | 3174.7813 | 3188.2783 | 3188.8767 | 3378.9940 |
| 3380.9205 |           |           |           |           |           |           |

### S.22.4 Immediate product cluster in diethyl amine

Cartesian coordinates (Immediate product cluster)

|    |           |           |           |
|----|-----------|-----------|-----------|
| C  | -1.809928 | 1.422263  | 0.504065  |
| H  | -0.936543 | 1.252089  | 1.136185  |
| H  | -1.639681 | 2.306577  | -0.109344 |
| H  | -2.692842 | 1.582342  | 1.123750  |
| C  | -2.336259 | -1.284201 | 0.578297  |
| H  | -2.501398 | -2.201341 | 0.013789  |
| H  | -1.461294 | -1.410878 | 1.217897  |
| H  | -3.216429 | -1.075781 | 1.187771  |
| C  | 1.621836  | -0.180301 | -0.345636 |
| H  | 1.568939  | -0.899882 | -1.157188 |
| H  | 1.260039  | 0.790885  | -0.669849 |
| H  | 1.061080  | -0.530992 | 0.516123  |
| S  | -2.065832 | 0.035919  | -0.627259 |
| Cl | 3.338679  | -0.007899 | 0.138626  |

SCF energy : -978.094821679  
Gibbs free energy: -978.016937

Frequencies

|           |           |           |           |           |           |           |
|-----------|-----------|-----------|-----------|-----------|-----------|-----------|
| 50.5455   | 68.9613   | 79.9324   | 82.5723   | 104.2441  | 128.6152  | 189.8072  |
| 194.8012  | 277.0982  | 705.4021  | 730.7896  | 759.0503  | 913.2235  | 954.8973  |
| 988.1397  | 1029.5302 | 1038.0788 | 1057.5002 | 1321.2661 | 1344.9026 | 1363.0270 |
| 1437.1366 | 1445.8404 | 1449.1268 | 1453.5888 | 1457.1024 | 1464.1973 | 3057.1845 |
| 3060.6126 | 3105.7763 | 3140.7490 | 3149.0261 | 3169.5542 | 3172.8121 | 3216.4727 |
| 3220.0062 |           |           |           |           |           |           |

### S.22.5 CH<sub>3</sub>Cl in diethyl amine

Cartesian coordinates (standard orientation)

|    |           |           |           |
|----|-----------|-----------|-----------|
| C  | 0.000000  | 0.000000  | -1.131780 |
| H  | 0.000000  | 1.033088  | -1.467967 |
| H  | 0.894680  | -0.516544 | -1.467967 |
| H  | -0.894680 | -0.516544 | -1.467967 |
| Cl | 0.000000  | 0.000000  | 0.658505  |

SCF energy : -500.111788975  
Gibbs free energy: -500.096641

Frequencies

|           |           |           |           |           |           |           |
|-----------|-----------|-----------|-----------|-----------|-----------|-----------|
| 729.7596  | 1030.5272 | 1031.0102 | 1359.2786 | 1455.4863 | 1455.8532 | 3097.8997 |
| 3209.3825 | 3209.5886 |           |           |           |           |           |

### S.22.6 (CH<sub>3</sub>)<sub>2</sub>S in diethyl amine

Cartesian coordinates (standard orientation)

|   |           |           |           |
|---|-----------|-----------|-----------|
| C | -1.379317 | 0.511392  | 0.000045  |
| H | -1.356410 | 1.136026  | -0.894278 |
| H | -2.295611 | -0.078764 | -0.000582 |
| H | -1.356688 | 1.135631  | 0.894487  |
| C | 1.379323  | 0.511391  | 0.000045  |
| H | 2.295614  | -0.078770 | -0.000674 |
| H | 1.356362  | 1.136085  | -0.894233 |
| H | 1.356737  | 1.135560  | 0.894535  |
| S | -0.000002 | -0.657654 | 0.000013  |

SCF energy : -477.980875937  
Gibbs free energy: -477.932286



Frequencies

|           |           |           |           |           |           |           |
|-----------|-----------|-----------|-----------|-----------|-----------|-----------|
| 188.2163  | 209.3983  | 274.9623  | 702.0036  | 752.2128  | 911.7013  | 946.7676  |
| 983.8586  | 1039.2355 | 1314.4646 | 1338.8580 | 1435.0133 | 1445.9378 | 1449.0396 |
| 1456.4021 | 3047.4635 | 3050.6575 | 3131.9175 | 3140.1602 | 3161.4190 | 3162.7297 |

### S.22.7 $\text{CH}_3^+$ in diethyl amine

Cartesian coordinates (standard orientation)

|   |           |           |           |
|---|-----------|-----------|-----------|
| C | 0.000019  | 0.000033  | -0.000018 |
| H | -0.243540 | 1.059168  | 0.000037  |
| H | -0.795907 | -0.740493 | 0.000037  |
| H | 1.039334  | -0.318872 | 0.000037  |

SCF energy : -39.5391400108

Gibbs free energy: -39.526836

Frequencies

|           |           |           |           |           |           |
|-----------|-----------|-----------|-----------|-----------|-----------|
| 1383.1399 | 1396.3118 | 1401.3835 | 3060.8787 | 3260.7896 | 3270.0544 |
|-----------|-----------|-----------|-----------|-----------|-----------|

## S.23 Selected cluster geometries in dibutyl ether

### S.23.1 $(\text{CH}_3)_3\text{S}^+$ in dibutyl ether

Cartesian coordinates (input orientation)

|   |           |           |           |
|---|-----------|-----------|-----------|
| C | 0.003964  | 1.611259  | 0.262873  |
| H | 0.006757  | 1.492364  | 1.344351  |
| H | 0.895798  | 2.128595  | -0.084943 |
| H | -0.887038 | 2.133364  | -0.080358 |
| C | -1.398929 | -0.800801 | 0.274104  |
| H | -1.384447 | -1.845534 | -0.030550 |
| H | -1.309372 | -0.699488 | 1.353632  |
| H | -2.297821 | -0.313741 | -0.099079 |
| C | 1.393821  | -0.811939 | 0.258937  |
| H | 1.430710  | -1.825573 | -0.135538 |
| H | 2.284324  | -0.262170 | -0.039932 |
| H | 1.265621  | -0.805141 | 1.339451  |
| S | -0.003387 | -0.001195 | -0.528988 |

SCF energy : -517.666974987

Gibbs free energy: -517.580940

Frequencies

|           |           |           |           |           |           |           |
|-----------|-----------|-----------|-----------|-----------|-----------|-----------|
| 117.7605  | 158.5048  | 251.0573  | 290.4423  | 298.6916  | 346.1667  | 649.9842  |
| 732.5910  | 740.6553  | 903.2953  | 935.6496  | 945.1121  | 1025.5283 | 1049.7057 |
| 1067.9766 | 1322.4284 | 1331.0800 | 1352.7623 | 1416.7750 | 1427.1113 | 1431.8521 |

1439.1597 1450.5890 1461.8543 3074.3353 3087.7204 3096.8117 3186.3092  
3199.1943 3200.8150 3209.1887 3210.2806 3217.6379

### S.23.2 Tripod ion pair in dibutyl ether

Cartesian coordinates (standard orientation)

|    |           |           |           |
|----|-----------|-----------|-----------|
| C  | -0.695382 | -1.008327 | -1.258335 |
| H  | 0.387615  | -0.909002 | -1.145244 |
| H  | -1.038406 | -2.029568 | -1.100870 |
| H  | -1.050665 | -0.640066 | -2.219164 |
| C  | -0.688369 | 1.594426  | -0.243784 |
| H  | -1.033156 | 2.242556  | 0.560394  |
| H  | 0.394006  | 1.440017  | -0.222104 |
| H  | -1.035225 | 1.973679  | -1.203319 |
| C  | -0.685922 | -0.585706 | 1.502584  |
| H  | -1.030232 | 0.055049  | 2.312432  |
| H  | -1.030773 | -1.605853 | 1.662084  |
| H  | 0.396280  | -0.528429 | 1.355352  |
| S  | -1.491616 | 0.000868  | 0.001895  |
| Cl | 2.430850  | -0.000861 | -0.001922 |

SCF energy : -978.088687869

Gibbs free energy: -978.005778

Frequencies

|           |           |           |           |           |           |           |
|-----------|-----------|-----------|-----------|-----------|-----------|-----------|
| 103.9079  | 116.1409  | 137.7271  | 209.4944  | 228.8895  | 268.7060  | 276.5405  |
| 283.3785  | 321.4429  | 647.7048  | 720.7811  | 727.0315  | 911.7978  | 956.5305  |
| 964.4818  | 1052.8316 | 1063.3905 | 1075.7291 | 1320.4810 | 1323.8072 | 1360.6257 |
| 1418.1338 | 1423.3778 | 1441.2364 | 1446.3928 | 1456.3787 | 1459.0460 | 3025.2557 |
| 3030.1280 | 3040.2224 | 3162.6873 | 3167.6385 | 3170.9073 | 3194.9851 | 3196.6001 |
| 3203.0690 |           |           |           |           |           |           |

### S.23.3 Linear transition state in dibutyl ether

Cartesian coordinates (standard orientation)

|   |           |           |           |
|---|-----------|-----------|-----------|
| C | 1.950308  | -1.388140 | 0.470494  |
| H | 1.412623  | -1.333380 | 1.417211  |
| H | 1.672368  | -2.295766 | -0.063151 |
| H | 3.025919  | -1.379680 | 0.639532  |
| C | 1.950228  | 1.388169  | 0.470482  |
| H | 1.672288  | 2.295766  | -0.063208 |
| H | 1.412485  | 1.333428  | 1.417170  |
| H | 3.025829  | 1.379745  | 0.639593  |
| C | -0.772549 | -0.000015 | -0.257566 |
| H | -0.897531 | 0.928614  | -0.785481 |
| H | -0.897497 | -0.928834 | -0.785159 |

|    |           |           |           |
|----|-----------|-----------|-----------|
| H  | -0.653358 | 0.000169  | 0.811604  |
| S  | 1.503396  | 0.000000  | -0.590307 |
| Cl | -3.093846 | -0.000008 | 0.124491  |

SCF energy : -978.051391195

Gibbs free energy: -977.972772

#### Frequencies

|           |           |           |           |           |           |           |
|-----------|-----------|-----------|-----------|-----------|-----------|-----------|
| -559.0949 | 47.3297   | 77.7723   | 91.6625   | 132.7287  | 184.4600  | 221.7540  |
| 257.5195  | 269.7145  | 295.9136  | 703.3908  | 753.8399  | 913.8773  | 939.6715  |
| 966.6878  | 1000.6828 | 1002.3296 | 1041.9015 | 1047.7199 | 1319.9012 | 1346.8889 |
| 1355.9158 | 1364.2386 | 1433.0506 | 1436.2600 | 1449.2666 | 1453.7363 | 3069.9975 |
| 3073.6184 | 3170.9780 | 3172.0032 | 3175.1877 | 3188.6465 | 3189.3312 | 3377.5167 |
| 3380.0083 |           |           |           |           |           |           |

### S.23.4 Immediate product cluster in dibutyl ether

#### Cartesian coordinates (standard orientation)

|    |           |           |           |
|----|-----------|-----------|-----------|
| C  | -1.853808 | 1.419360  | 0.508604  |
| H  | -0.989365 | 1.267915  | 1.157533  |
| H  | -1.691546 | 2.308270  | -0.100263 |
| H  | -2.751876 | 1.559117  | 1.111271  |
| C  | -2.317206 | -1.298223 | 0.569550  |
| H  | -2.452553 | -2.217737 | 0.001007  |
| H  | -1.450431 | -1.407118 | 1.223627  |
| H  | -3.211835 | -1.110917 | 1.164636  |
| C  | 1.621145  | -0.147106 | -0.332408 |
| H  | 1.541994  | -0.876047 | -1.133443 |
| H  | 1.280303  | 0.828094  | -0.667270 |
| H  | 1.059141  | -0.471984 | 0.538709  |
| S  | -2.056416 | 0.029660  | -0.629271 |
| Cl | 3.345179  | -0.011667 | 0.135180  |

SCF energy : -978.094500217

Gibbs free energy: -978.017319

#### Frequencies

|           |           |           |           |           |           |           |
|-----------|-----------|-----------|-----------|-----------|-----------|-----------|
| 36.6176   | 61.1652   | 69.4897   | 78.6582   | 104.5775  | 125.5907  | 182.0590  |
| 195.7217  | 276.4331  | 705.1973  | 733.9969  | 758.2149  | 912.6934  | 953.3478  |
| 986.7769  | 1023.9061 | 1037.9026 | 1055.9282 | 1320.8272 | 1344.4064 | 1361.4345 |
| 1437.6804 | 1445.9323 | 1448.9174 | 1454.7998 | 1456.8652 | 1462.3228 | 3058.1121 |
| 3061.0255 | 3102.2357 | 3141.2993 | 3149.0036 | 3170.0477 | 3173.5439 | 3211.8526 |
| 3218.4183 |           |           |           |           |           |           |

### S.23.5 CH<sub>3</sub>Cl in dibutyl ether

Cartesian coordinates (standard orientation)

|    |           |           |           |
|----|-----------|-----------|-----------|
| C  | 0.000000  | 0.000000  | -1.131335 |
| H  | 0.000000  | 1.032998  | -1.467947 |
| H  | 0.894602  | -0.516499 | -1.467947 |
| H  | -0.894602 | -0.516499 | -1.467947 |
| Cl | 0.000000  | 0.000000  | 0.658344  |

SCF energy : -500.111616578

Gibbs free energy: -500.096465

Frequencies

730.9822 1030.5936 1031.0341 1359.6538 1456.2755 1456.6437 3097.4977  
3208.6646 3208.8697

### S.23.6 (CH<sub>3</sub>)<sub>2</sub>S in dibutyl ether

Cartesian coordinates (standard orientation)

|   |           |           |           |
|---|-----------|-----------|-----------|
| C | -1.378981 | 0.511485  | 0.000046  |
| H | -1.356368 | 1.136118  | -0.894344 |
| H | -2.295361 | -0.078566 | -0.000525 |
| H | -1.356596 | 1.135820  | 0.894485  |
| C | 1.378987  | 0.511483  | 0.000045  |
| H | 2.295363  | -0.078572 | -0.000616 |
| H | 1.356320  | 1.136178  | -0.894299 |
| H | 1.356644  | 1.135750  | 0.894533  |
| S | -0.000002 | -0.657784 | 0.000014  |

SCF energy : -477.980673758

Gibbs free energy: -477.932082

Frequencies

188.4781 208.9577 274.8374 702.4270 752.5658 911.5328 946.6484  
983.9357 1039.2846 1314.6851 1339.0780 1435.5679 1446.4865 1449.6052  
1457.1648 3047.1195 3050.3343 3131.2929 3139.6042 3161.1983 3162.4834

### S.23.7 CH<sub>3</sub><sup>+</sup> in dibutyl ether

Cartesian coordinates (standard orientation)

|   |           |           |           |
|---|-----------|-----------|-----------|
| C | 0.000017  | 0.000038  | -0.000020 |
| H | -0.266122 | 1.053980  | 0.000040  |
| H | -0.780103 | -0.757475 | 0.000040  |
| H | 1.046124  | -0.296735 | 0.000040  |

SCF energy : -39.5334420315

Gibbs free energy: -39.521234

Frequencies

1378.6867 1385.6600 1395.2299 3054.3043 3254.6920 3262.3721

## S.24 Selected cluster geometries in tetralin

### S.24.1 $(\text{CH}_3)_3\text{S}^+$ in tetralin

Cartesian coordinates (input orientation)

|   |           |           |           |
|---|-----------|-----------|-----------|
| C | 0.004030  | 1.611055  | 0.262760  |
| H | 0.006825  | 1.492643  | 1.344330  |
| H | 0.895807  | 2.128459  | -0.085211 |
| H | -0.886911 | 2.133273  | -0.080584 |
| C | -1.399595 | -0.800641 | 0.274417  |
| H | -1.385830 | -1.845674 | -0.029387 |
| H | -1.310846 | -0.698496 | 1.353967  |
| H | -2.298199 | -0.313611 | -0.099685 |
| C | 1.394411  | -0.812148 | 0.258819  |
| H | 1.433270  | -1.825163 | -0.137175 |
| H | 2.284367  | -0.260775 | -0.038965 |
| H | 1.266118  | -0.807184 | 1.339370  |
| S | -0.003446 | -0.001737 | -0.528696 |

SCF energy : -517.664173670

Gibbs free energy: -517.578352

Frequencies

|           |           |           |           |           |           |           |
|-----------|-----------|-----------|-----------|-----------|-----------|-----------|
| 98.1989   | 158.5495  | 250.7939  | 289.4467  | 297.6913  | 345.5276  | 649.2092  |
| 732.1995  | 740.2279  | 903.4479  | 934.1273  | 945.3692  | 1024.1734 | 1047.8586 |
| 1067.1336 | 1321.6771 | 1331.4912 | 1351.3122 | 1416.9143 | 1427.6772 | 1432.0643 |
| 1438.8021 | 1450.5235 | 1461.5169 | 3074.0979 | 3087.3283 | 3096.3673 | 3185.9693 |
| 3198.8301 | 3200.2297 | 3208.6856 | 3210.0035 | 3217.2412 |           |           |

### S.24.2 Tripod ion pair in tetralin

Cartesian coordinates (standard orientation)

|   |           |           |           |
|---|-----------|-----------|-----------|
| C | 0.685656  | -1.181146 | -1.097491 |
| H | -0.396955 | -1.072383 | -0.985423 |
| H | 1.025429  | -0.951735 | -2.106077 |
| H | 1.038902  | -2.167410 | -0.800879 |
| C | 0.691816  | -0.361353 | 1.571332  |
| H | 1.037698  | 0.392175  | 2.276997  |
| H | -0.391321 | -0.330307 | 1.422100  |
| H | 1.041880  | -1.346114 | 1.876034  |

|    |           |           |           |
|----|-----------|-----------|-----------|
| C  | 0.678636  | 1.541615  | -0.472601 |
| H  | 1.021179  | 2.299980  | 0.229619  |
| H  | 1.023672  | 1.780703  | -1.477102 |
| H  | -0.403181 | 1.386768  | -0.426970 |
| S  | 1.487687  | 0.002730  | -0.002818 |
| Cl | -2.419820 | -0.001768 | 0.001726  |

SCF energy : -978.087207965

Gibbs free energy: -978.003907

#### Frequencies

|           |           |           |           |           |           |           |
|-----------|-----------|-----------|-----------|-----------|-----------|-----------|
| 111.9300  | 124.2100  | 144.0222  | 224.9705  | 247.3887  | 253.0808  | 272.8849  |
| 287.7377  | 326.6659  | 646.8054  | 722.5440  | 726.2680  | 909.0109  | 961.0415  |
| 964.7515  | 1056.3603 | 1059.8202 | 1078.6351 | 1321.5511 | 1323.8022 | 1360.2621 |
| 1420.8172 | 1421.7253 | 1439.9022 | 1444.9241 | 1455.6666 | 1460.1810 | 3023.9526 |
| 3034.4592 | 3040.7520 | 3169.8628 | 3171.3274 | 3172.5011 | 3200.9661 | 3205.2530 |
| 3208.4702 |           |           |           |           |           |           |

### S.24.3 Linear transition state in tetralin

#### Cartesian coordinates (standard orientation)

|    |           |           |           |
|----|-----------|-----------|-----------|
| C  | 1.945954  | -1.387982 | 0.471624  |
| H  | 1.405491  | -1.332668 | 1.416754  |
| H  | 1.669053  | -2.295682 | -0.062460 |
| H  | 3.021111  | -1.379920 | 0.643524  |
| C  | 1.945863  | 1.388015  | 0.471609  |
| H  | 1.668853  | 2.295682  | -0.062472 |
| H  | 1.405428  | 1.332658  | 1.416755  |
| H  | 3.021026  | 1.380060  | 0.643491  |
| C  | -0.765326 | -0.000017 | -0.260640 |
| H  | -0.895465 | 0.928312  | -0.787982 |
| H  | -0.895402 | -0.928660 | -0.787451 |
| H  | -0.651136 | 0.000288  | 0.809136  |
| S  | 1.502134  | 0.000000  | -0.590516 |
| Cl | -3.090709 | -0.000009 | 0.124906  |

SCF energy : -978.050343494

Gibbs free energy: -977.971514

#### Frequencies

|           |           |           |           |           |           |           |
|-----------|-----------|-----------|-----------|-----------|-----------|-----------|
| -552.6291 | 51.8353   | 81.1596   | 95.1776   | 135.6969  | 185.4072  | 219.8504  |
| 259.0001  | 270.7656  | 295.6845  | 703.4396  | 753.8223  | 913.8152  | 940.0030  |
| 967.1297  | 1002.8733 | 1003.7518 | 1043.5531 | 1047.6772 | 1320.2787 | 1346.9114 |

1356.1778 1364.4768 1433.2093 1436.8507 1449.1600 1454.0055 3070.3923  
3073.8749 3170.5076 3172.4522 3175.5154 3188.8685 3189.5696 3376.5468  
3379.3167

#### S.24.4 Immediate product cluster in tetralin

Cartesian coordinates (standard orientation)

|    |           |           |           |
|----|-----------|-----------|-----------|
| C  | -1.855132 | 1.419482  | 0.508237  |
| H  | -0.991146 | 1.269198  | 1.158096  |
| H  | -1.693080 | 2.308343  | -0.100774 |
| H  | -2.753866 | 1.558920  | 1.110027  |
| C  | -2.316607 | -1.298057 | 0.569856  |
| H  | -2.450889 | -2.217931 | 0.001629  |
| H  | -1.450437 | -1.406340 | 1.224897  |
| H  | -3.211967 | -1.111195 | 1.164023  |
| C  | 1.621306  | -0.147921 | -0.332509 |
| H  | 1.542241  | -0.878772 | -1.131844 |
| H  | 1.280101  | 0.826291  | -0.669933 |
| H  | 1.058753  | -0.470786 | 0.539046  |
| S  | -2.055567 | 0.029326  | -0.629390 |
| Cl | 3.344821  | -0.011057 | 0.135387  |

SCF energy : -978.094294383

Gibbs free energy: -978.017005

Frequencies

|           |           |           |           |           |           |           |
|-----------|-----------|-----------|-----------|-----------|-----------|-----------|
| 38.2521   | 62.2896   | 69.9793   | 79.9081   | 105.3502  | 127.0573  | 182.3210  |
| 195.7295  | 276.3080  | 705.4870  | 734.5105  | 758.4772  | 912.5867  | 953.3564  |
| 986.8731  | 1024.1301 | 1037.9453 | 1056.7669 | 1321.0203 | 1344.5954 | 1362.0384 |
| 1438.0291 | 1446.3032 | 1449.2644 | 1455.4111 | 1457.3552 | 1462.9573 | 3058.0039 |
| 3060.8980 | 3101.7182 | 3141.0585 | 3148.7691 | 3169.9351 | 3173.4442 | 3211.1837 |
| 3217.8046 |           |           |           |           |           |           |

#### S.24.5 CH<sub>3</sub>Cl in tetralin

Cartesian coordinates (standard orientation)

|    |           |           |           |
|----|-----------|-----------|-----------|
| C  | 0.000000  | 0.000000  | -1.131045 |
| H  | 0.000000  | 1.032938  | -1.467938 |
| H  | 0.894551  | -0.516469 | -1.467938 |
| H  | -0.894551 | -0.516469 | -1.467938 |
| Cl | 0.000000  | 0.000000  | 0.658240  |

SCF energy : -500.111504766

Gibbs free energy: -500.096351

#### Frequencies

731.7821 1030.6311 1031.0459 1359.8948 1456.7805 1457.1464 3097.2407  
3208.2000 3208.4025

#### S.24.6 (CH<sub>3</sub>)<sub>2</sub>S in tetralin

##### Cartesian coordinates (standard orientation)

|   |           |           |           |
|---|-----------|-----------|-----------|
| C | -1.378766 | 0.511544  | 0.000046  |
| H | -1.356343 | 1.136177  | -0.894386 |
| H | -2.295200 | -0.078441 | -0.000486 |
| H | -1.356537 | 1.135945  | 0.894481  |
| C | 1.378772  | 0.511542  | 0.000046  |
| H | 2.295202  | -0.078447 | -0.000578 |
| H | 1.356296  | 1.136237  | -0.894341 |
| H | 1.356586  | 1.135874  | 0.894529  |
| S | -0.000002 | -0.657866 | 0.000015  |

SCF energy : -477.980544023

Gibbs free energy: -477.931952

#### Frequencies

188.6628 208.5740 274.6966 702.6964 752.7917 911.4261 946.5736  
983.9558 1039.2960 1314.8264 1339.1980 1435.9211 1446.8169 1449.9746  
1457.6472 3046.8973 3050.1282 3130.8897 3139.2484 3161.0542 3162.3241

#### S.24.7 CH<sub>3</sub><sup>+</sup> in tetralin

##### Cartesian coordinates (standard orientation)

|   |           |           |           |
|---|-----------|-----------|-----------|
| C | 0.000015  | 0.000042  | -0.000020 |
| H | -0.284105 | 1.049452  | 0.000040  |
| H | -0.767175 | -0.770798 | 0.000040  |
| H | 1.051187  | -0.278906 | 0.000040  |

SCF energy : -39.5296029611

Gibbs free energy: -39.517429

#### Frequencies

1376.7078 1382.5603 1393.2997 3051.8060 3252.1196 3259.5559

### S.25 Selected cluster geometries in carbon disulfide

#### S.25.1 (CH<sub>3</sub>)<sub>3</sub>S<sup>+</sup> in carbon disulfide

##### Cartesian coordinates (input orientation)

|   |          |          |           |
|---|----------|----------|-----------|
| C | 0.004054 | 1.610931 | 0.262676  |
| H | 0.006858 | 1.492864 | 1.344311  |
| H | 0.895778 | 2.128402 | -0.085412 |



|   |           |           |           |
|---|-----------|-----------|-----------|
| H | -0.886861 | 2.133202  | -0.080740 |
| C | -1.400031 | -0.800561 | 0.274594  |
| H | -1.386884 | -1.845729 | -0.028875 |
| H | -1.311716 | -0.698093 | 1.354173  |
| H | -2.298427 | -0.313392 | -0.099944 |
| C | 1.394821  | -0.812272 | 0.258782  |
| H | 1.434903  | -1.824944 | -0.138044 |
| H | 2.284436  | -0.259955 | -0.038430 |
| H | 1.266538  | -0.808350 | 1.339363  |
| S | -0.003468 | -0.002102 | -0.528496 |

SCF energy : -517.662275408

Gibbs free energy: -517.576615

#### Frequencies

|           |           |           |           |           |           |           |
|-----------|-----------|-----------|-----------|-----------|-----------|-----------|
| 85.2230   | 159.1780  | 250.5148  | 288.4487  | 296.8923  | 344.7314  | 648.7367  |
| 731.9296  | 739.9299  | 903.5113  | 933.2503  | 945.4780  | 1023.5010 | 1046.6898 |
| 1066.4677 | 1321.2754 | 1331.7605 | 1350.4712 | 1417.0716 | 1428.0161 | 1432.1799 |
| 1438.5028 | 1450.4306 | 1461.1316 | 3073.9677 | 3087.0718 | 3096.0553 | 3185.7740 |
| 3198.5858 | 3199.8754 | 3208.3435 | 3209.7870 | 3216.9402 |           |           |

### S.25.2 Tripod ion pair in carbon disulfide

#### Cartesian coordinates (standard orientation)

|    |           |           |           |
|----|-----------|-----------|-----------|
| C  | 0.674914  | 1.544288  | -0.468927 |
| H  | -0.407055 | 1.396896  | -0.403199 |
| H  | 1.037513  | 2.303021  | 0.222638  |
| H  | 1.002383  | 1.777040  | -1.480866 |
| C  | 0.675152  | -1.180994 | -1.099356 |
| H  | 1.024045  | -2.167758 | -0.798804 |
| H  | -0.407440 | -1.067482 | -0.987680 |
| H  | 1.016542  | -0.956736 | -2.108677 |
| C  | 0.697068  | -0.365114 | 1.571660  |
| H  | 1.058572  | -1.346074 | 1.876218  |
| H  | 1.039936  | 0.391822  | 2.275639  |
| H  | -0.386781 | -0.342448 | 1.428310  |
| S  | 1.482452  | 0.002449  | -0.007681 |
| Cl | -2.410574 | -0.000974 | 0.004651  |

SCF energy : -978.086193477

Gibbs free energy: -978.002870

#### Frequencies

|          |          |          |          |          |          |          |
|----------|----------|----------|----------|----------|----------|----------|
| 114.8198 | 126.3672 | 146.0029 | 228.8507 | 246.1313 | 251.3475 | 273.1063 |
| 287.6957 | 326.8508 | 645.8020 | 721.6759 | 725.8210 | 909.7354 | 961.8582 |

|           |           |           |           |           |           |           |
|-----------|-----------|-----------|-----------|-----------|-----------|-----------|
| 964.2891  | 1057.2104 | 1059.6680 | 1078.5487 | 1321.3584 | 1323.9412 | 1359.9127 |
| 1420.9471 | 1421.3846 | 1440.8617 | 1444.1697 | 1456.9089 | 1459.9679 | 3020.0915 |
| 3032.1447 | 3040.5871 | 3167.6913 | 3170.0416 | 3171.5161 | 3197.5413 | 3203.4240 |
| 3205.7329 |           |           |           |           |           |           |

### S.25.3 Linear transition state in carbon disulfide

Cartesian coordinates (standard orientation)

|    |           |           |           |
|----|-----------|-----------|-----------|
| C  | 1.943123  | -1.387880 | 0.472365  |
| H  | 1.400829  | -1.332217 | 1.416442  |
| H  | 1.666910  | -2.295626 | -0.062015 |
| H  | 3.017977  | -1.380077 | 0.646150  |
| C  | 1.943001  | 1.387927  | 0.472343  |
| H  | 1.666609  | 2.295629  | -0.062014 |
| H  | 1.400776  | 1.332183  | 1.416457  |
| H  | 3.017868  | 1.380287  | 0.646066  |
| C  | -0.760540 | -0.000027 | -0.262666 |
| H  | -0.894125 | 0.928086  | -0.789629 |
| H  | -0.894043 | -0.928542 | -0.788944 |
| H  | -0.649738 | 0.000368  | 0.807512  |
| S  | 1.501318  | -0.000001 | -0.590641 |
| Cl | -3.088686 | -0.000011 | 0.125175  |

SCF energy : -978.049641371

Gibbs free energy: -977.970693

Frequencies

|           |           |           |           |           |           |           |
|-----------|-----------|-----------|-----------|-----------|-----------|-----------|
| -548.1767 | 54.4806   | 83.2905   | 96.5316   | 138.1138  | 185.9608  | 218.7369  |
| 259.9320  | 271.3176  | 295.5634  | 703.4688  | 753.8196  | 913.7592  | 940.2046  |
| 967.3940  | 1004.3456 | 1004.5924 | 1044.5727 | 1047.8321 | 1320.5186 | 1346.9441 |
| 1356.3050 | 1364.6182 | 1433.3352 | 1437.2529 | 1449.1007 | 1454.1849 | 3070.6831 |
| 3074.0409 | 3170.2065 | 3172.7737 | 3175.7359 | 3189.0055 | 3189.7009 | 3375.9063 |
| 3378.8145 |           |           |           |           |           |           |

### S.25.4 Immediate product cluster in carbon disulfide

Cartesian coordinates (standard orientation)

|   |           |           |           |
|---|-----------|-----------|-----------|
| C | -1.827771 | 1.422402  | 0.503736  |
| H | -0.957953 | 1.262253  | 1.143473  |
| H | -1.661357 | 2.307795  | -0.109187 |
| H | -2.717259 | 1.575098  | 1.115951  |
| C | -2.328415 | -1.287675 | 0.577306  |
| H | -2.480849 | -2.207144 | 0.012988  |
| H | -1.457640 | -1.406222 | 1.224382  |
| H | -3.215426 | -1.086890 | 1.179482  |
| C | 1.622614  | -0.174874 | -0.342729 |

|    |           |           |           |
|----|-----------|-----------|-----------|
| H  | 1.563310  | -0.908064 | -1.141655 |
| H  | 1.266587  | 0.792583  | -0.684261 |
| H  | 1.058652  | -0.506494 | 0.524635  |
| S  | -2.060583 | 0.032741  | -0.628204 |
| Cl | 3.339570  | -0.006228 | 0.138563  |

SCF energy : -978.094158785

Gibbs free energy: -978.016453

#### Frequencies

|           |           |           |           |           |           |           |
|-----------|-----------|-----------|-----------|-----------|-----------|-----------|
| 42.0107   | 70.9936   | 75.9510   | 85.6187   | 104.8149  | 131.4722  | 183.3429  |
| 195.5135  | 276.6210  | 705.6099  | 732.8551  | 758.9838  | 912.7378  | 953.8816  |
| 987.5010  | 1028.8802 | 1038.0774 | 1059.1541 | 1321.3713 | 1345.0168 | 1364.3028 |
| 1438.2898 | 1446.7854 | 1449.7995 | 1455.9799 | 1458.2759 | 1463.8630 | 3056.8853 |
| 3060.0410 | 3102.3592 | 3139.8878 | 3147.8730 | 3169.3919 | 3173.1895 | 3212.3783 |
| 3217.0502 |           |           |           |           |           |           |

#### S.25.5 CH<sub>3</sub>Cl in carbon disulfide

##### Cartesian coordinates (standard orientation)

|    |           |           |           |
|----|-----------|-----------|-----------|
| C  | 0.000000  | 0.000000  | -1.130853 |
| H  | 0.000000  | 1.032898  | -1.467933 |
| H  | 0.894516  | -0.516449 | -1.467933 |
| H  | -0.894516 | -0.516449 | -1.467933 |
| Cl | 0.000000  | 0.000000  | 0.658172  |

SCF energy : -500.111430841

Gibbs free energy: -500.096275

#### Frequencies

|           |           |           |           |           |           |           |
|-----------|-----------|-----------|-----------|-----------|-----------|-----------|
| 732.3142  | 1030.6535 | 1031.0525 | 1360.0533 | 1457.1116 | 1457.4746 | 3097.0725 |
| 3207.8933 | 3208.0932 |           |           |           |           |           |

#### S.25.6 (CH<sub>3</sub>)<sub>2</sub>S in carbon disulfide

##### Cartesian coordinates (standard orientation)

|   |           |           |           |
|---|-----------|-----------|-----------|
| C | -1.378625 | 0.511582  | 0.000046  |
| H | -1.356328 | 1.136217  | -0.894413 |
| H | -2.295094 | -0.078360 | -0.000460 |
| H | -1.356499 | 1.136027  | 0.894477  |
| C | 1.378631  | 0.511581  | 0.000046  |
| H | 2.295097  | -0.078366 | -0.000552 |
| H | 1.356281  | 1.136276  | -0.894369 |
| H | 1.356547  | 1.135957  | 0.894525  |
| S | -0.000002 | -0.657921 | 0.000015  |

SCF energy : -477.980458833

Gibbs free energy: -477.931867

Frequencies

|           |           |           |           |           |           |           |
|-----------|-----------|-----------|-----------|-----------|-----------|-----------|
| 188.7893  | 208.2829  | 274.5804  | 702.8721  | 752.9397  | 911.3566  | 946.5248  |
| 983.9575  | 1039.2958 | 1314.9190 | 1339.2686 | 1436.1519 | 1447.0257 | 1450.2196 |
| 1457.9610 | 3046.7509 | 3049.9932 | 3130.6240 | 3139.0149 | 3160.9586 | 3162.2189 |

### S.25.7 $\text{CH}_3^+$ in carbon disulfide

Cartesian coordinates (standard orientation)

|   |           |           |           |
|---|-----------|-----------|-----------|
| C | 0.000014  | 0.000044  | -0.000020 |
| H | -0.297815 | 1.045764  | 0.000040  |
| H | -0.757114 | -0.780837 | 0.000040  |
| H | 1.054845  | -0.265194 | 0.000040  |

SCF energy : -39.5270007168

Gibbs free energy: -39.514811

Frequencies

|           |           |           |           |           |           |
|-----------|-----------|-----------|-----------|-----------|-----------|
| 1378.7354 | 1386.8174 | 1394.3906 | 3051.8356 | 3252.1155 | 3259.3878 |
|-----------|-----------|-----------|-----------|-----------|-----------|

## S.26 Selected cluster geometries in benzene

### S.26.1 $(\text{CH}_3)_3\text{S}^+$ in benzene

Cartesian coordinates (input orientation)

|   |           |           |           |
|---|-----------|-----------|-----------|
| C | 0.004085  | 1.610799  | 0.262636  |
| H | 0.006878  | 1.493585  | 1.344434  |
| H | 0.895693  | 2.128448  | -0.085712 |
| H | -0.886732 | 2.133270  | -0.080971 |
| C | -1.401045 | -0.800484 | 0.274880  |
| H | -1.389106 | -1.845913 | -0.027999 |
| H | -1.313941 | -0.697408 | 1.354563  |
| H | -2.299040 | -0.313179 | -0.100733 |
| C | 1.395792  | -0.812543 | 0.258708  |
| H | 1.438064  | -1.824703 | -0.139393 |
| H | 2.284772  | -0.258693 | -0.037940 |
| H | 1.268088  | -0.810368 | 1.339424  |
| S | -0.003509 | -0.002809 | -0.527939 |

SCF energy : -517.657373781

Gibbs free energy: -517.572168

### Frequencies

|           |           |           |           |           |           |           |
|-----------|-----------|-----------|-----------|-----------|-----------|-----------|
| 56.7424   | 162.2241  | 248.7570  | 285.2690  | 294.1970  | 341.3823  | 647.6854  |
| 731.2101  | 739.1650  | 903.4653  | 931.6458  | 945.3801  | 1022.3091 | 1044.2442 |
| 1064.2746 | 1320.6616 | 1332.2846 | 1348.7697 | 1417.6224 | 1428.7148 | 1432.3818 |
| 1437.6197 | 1449.9436 | 1459.7237 | 3073.7744 | 3086.4616 | 3095.1635 | 3185.4612 |
| 3197.9377 | 3199.1342 | 3207.3914 | 3209.2279 | 3216.0357 |           |           |

### S.26.2 Tripod ion pair in benzene

#### Cartesian coordinates (standard orientation)

|    |           |           |           |
|----|-----------|-----------|-----------|
| C  | 0.677787  | -1.077683 | -1.199681 |
| H  | -0.405463 | -0.976420 | -1.078598 |
| H  | 1.019526  | -0.755288 | -2.181962 |
| H  | 1.029713  | -2.087612 | -0.994553 |
| C  | 0.668170  | -0.501471 | 1.532035  |
| H  | 1.013446  | 0.184377  | 2.304043  |
| H  | -0.414096 | -0.447966 | 1.375677  |
| H  | 1.009626  | -1.512352 | 1.749662  |
| C  | 0.682731  | 1.578358  | -0.332408 |
| H  | 1.027966  | 2.267559  | 0.436562  |
| H  | 1.037547  | 1.901571  | -1.309784 |
| H  | -0.401059 | 1.429433  | -0.306875 |
| S  | 1.478264  | -0.001957 | 0.002901  |
| Cl | -2.396562 | 0.001928  | -0.002368 |

SCF energy : -978.083705433

Gibbs free energy: -978.000086

### Frequencies

|           |           |           |           |           |           |           |
|-----------|-----------|-----------|-----------|-----------|-----------|-----------|
| 121.7470  | 137.0252  | 152.0875  | 233.9814  | 252.7244  | 257.8030  | 277.6536  |
| 291.1399  | 328.7458  | 647.6215  | 721.7471  | 726.8037  | 910.5636  | 962.5529  |
| 965.5131  | 1058.8307 | 1062.4723 | 1078.9170 | 1321.1272 | 1324.0398 | 1362.1286 |
| 1420.8877 | 1421.2191 | 1443.0930 | 1445.8940 | 1458.2945 | 1462.6313 | 3014.7281 |
| 3025.0304 | 3035.6011 | 3165.7954 | 3168.0935 | 3169.0352 | 3199.7114 | 3202.4810 |
| 3205.9039 |           |           |           |           |           |           |

### S.26.3 Linear transition state in benzene

#### Cartesian coordinates (standard orientation)

|   |           |           |           |
|---|-----------|-----------|-----------|
| C | -1.936187 | 1.387745  | 0.473919  |
| H | -1.389871 | 1.331422  | 1.415675  |
| H | -1.661407 | 2.295516  | -0.061201 |
| H | -3.010387 | 1.380548  | 0.651722  |
| C | -1.936226 | -1.387727 | 0.473928  |
| H | -1.661406 | -2.295505 | -0.061160 |
| H | -1.389960 | -1.331379 | 1.415710  |

|    |           |           |           |
|----|-----------|-----------|-----------|
| H  | -3.010436 | -1.380539 | 0.651676  |
| C  | 0.748443  | -0.000010 | -0.267458 |
| H  | 0.890683  | -0.927879 | -0.792908 |
| H  | 0.890693  | 0.927821  | -0.792968 |
| H  | 0.646725  | 0.000027  | 0.803743  |
| S  | -1.498642 | -0.000001 | -0.590741 |
| Cl | 3.083380  | -0.000003 | 0.125837  |

SCF energy : -978.047856232

Gibbs free energy: -977.968631

#### Frequencies

|           |           |           |           |           |           |           |
|-----------|-----------|-----------|-----------|-----------|-----------|-----------|
| -536.0514 | 61.0429   | 87.9457   | 99.0700   | 144.7550  | 187.4200  | 216.8771  |
| 262.2209  | 272.5285  | 295.6584  | 703.5508  | 753.8826  | 913.5998  | 940.7131  |
| 968.1495  | 1006.9644 | 1007.9544 | 1046.1279 | 1049.9109 | 1321.0878 | 1347.1720 |
| 1356.3939 | 1364.9890 | 1433.7260 | 1438.2413 | 1449.0807 | 1454.6559 | 3071.4462 |
| 3074.3647 | 3169.3605 | 3173.6083 | 3176.1948 | 3189.3137 | 3189.9331 | 3374.1957 |
| 3377.1139 |           |           |           |           |           |           |

### S.26.4 Immediate product cluster in benzene

#### Cartesian coordinates (standard orientation)

|    |           |           |           |
|----|-----------|-----------|-----------|
| C  | -1.836046 | 1.422397  | 0.503561  |
| H  | -0.968272 | 1.266641  | 1.147210  |
| H  | -1.670842 | 2.308195  | -0.109117 |
| H  | -2.728740 | 1.572011  | 1.111924  |
| C  | -2.325074 | -1.289209 | 0.576811  |
| H  | -2.471911 | -2.209650 | 0.012576  |
| H  | -1.456296 | -1.404303 | 1.227303  |
| H  | -3.215137 | -1.091787 | 1.175640  |
| C  | 1.623100  | -0.172384 | -0.341301 |
| H  | 1.560930  | -0.910546 | -1.135473 |
| H  | 1.269188  | 0.793631  | -0.689190 |
| H  | 1.057944  | -0.496760 | 0.528108  |
| S  | -2.058120 | 0.031304  | -0.628650 |
| Cl | 3.340068  | -0.005478 | 0.138529  |

SCF energy : -978.093821994

Gibbs free energy: -978.016171

#### Frequencies

|           |           |           |           |           |           |           |
|-----------|-----------|-----------|-----------|-----------|-----------|-----------|
| 41.2026   | 71.0654   | 74.5280   | 85.7127   | 105.2787  | 129.5529  | 181.7654  |
| 195.9010  | 276.3308  | 705.9206  | 733.9367  | 759.1650  | 912.4940  | 953.2819  |
| 987.1332  | 1028.5605 | 1038.1038 | 1059.5334 | 1321.3669 | 1345.0530 | 1364.9523 |
| 1438.8594 | 1447.3415 | 1450.2287 | 1456.9980 | 1458.7554 | 1464.0765 | 3056.8553 |

3059.8988 3100.8718 3139.6122 3147.5313 3169.2917 3173.2238 3210.5210  
3215.5098

### S.26.5 CH<sub>3</sub>Cl in benzene

Cartesian coordinates (standard orientation)

|    |           |           |           |
|----|-----------|-----------|-----------|
| C  | 0.000000  | 0.000000  | -1.130021 |
| H  | 0.000000  | 1.032550  | -1.468314 |
| H  | 0.894215  | -0.516275 | -1.468314 |
| H  | -0.894215 | -0.516275 | -1.468314 |
| Cl | 0.000000  | 0.000000  | 0.657945  |

SCF energy : -500.111246701

Gibbs free energy: -500.096084

Frequencies

734.1399 1030.5966 1030.9523 1360.8632 1458.0129 1458.3633 3096.8642  
3207.0268 3207.2136

### S.26.6 (CH<sub>3</sub>)<sub>2</sub>S in benzene

Cartesian coordinates (standard orientation)

|   |           |           |           |
|---|-----------|-----------|-----------|
| C | -1.378280 | 0.511676  | 0.000047  |
| H | -1.356295 | 1.136314  | -0.894480 |
| H | -2.294833 | -0.078163 | -0.000396 |
| H | -1.356408 | 1.136234  | 0.894466  |
| C | 1.378286  | 0.511674  | 0.000046  |
| H | 2.294836  | -0.078170 | -0.000486 |
| H | 1.356248  | 1.136373  | -0.894435 |
| H | 1.356456  | 1.136165  | 0.894514  |
| S | -0.000002 | -0.658053 | 0.000016  |

SCF energy : -477.980248388

Gibbs free energy: -477.931658

Frequencies

189.1144 207.4412 274.2192 703.3025 753.3033 911.1863 946.4042  
983.9252 1039.2717 1315.1468 1339.4188 1436.7181 1447.5162 1450.8315  
1458.7274 3046.3879 3049.6604 3129.9653 3138.4381 3160.7188 3161.9568

### S.26.7 CH<sub>3</sub><sup>+</sup> in benzene

Cartesian coordinates (standard orientation)

|   |           |          |           |
|---|-----------|----------|-----------|
| C | 0.000010  | 0.000051 | -0.000019 |
| H | -0.340219 | 1.033065 | 0.000037  |

|   |           |           |          |
|---|-----------|-----------|----------|
| H | -0.724882 | -0.811235 | 0.000037 |
| H | 1.065040  | -0.222134 | 0.000037 |

SCF energy : -39.5202738197

Gibbs free energy: -39.508032

Frequencies

1381.6851 1388.1696 1404.3234 3055.3145 3255.0670 3261.8499

## S.27 Selected cluster geometries in carbon tetrachloride

### S.27.1 $(\text{CH}_3)_3\text{S}^+$ in carbon tetrachloride

Cartesian coordinates (input orientation)

|   |           |           |           |
|---|-----------|-----------|-----------|
| C | 0.004089  | 1.610816  | 0.262671  |
| H | 0.006864  | 1.493712  | 1.344491  |
| H | 0.895691  | 2.128483  | -0.085698 |
| H | -0.886700 | 2.133336  | -0.080971 |
| C | -1.401177 | -0.800490 | 0.274898  |
| H | -1.389289 | -1.845964 | -0.027870 |
| H | -1.314313 | -0.697291 | 1.354597  |
| H | -2.299143 | -0.313267 | -0.100930 |
| C | 1.395916  | -0.812578 | 0.258688  |
| H | 1.438339  | -1.824717 | -0.139481 |
| H | 2.284844  | -0.258649 | -0.038023 |
| H | 1.268395  | -0.810526 | 1.339433  |
| S | -0.003518 | -0.002865 | -0.527846 |

SCF energy : -517.656654490

Gibbs free energy: -517.571511

Frequencies

53.7895 162.7453 248.2858 284.7483 293.7174 340.7295 647.5441  
731.1002 739.0549 903.4255 931.4877 945.3075 1022.1670 1043.9595  
1063.8811 1320.6185 1332.3269 1348.5597 1417.7099 1428.7818 1432.4001  
1437.4833 1449.8323 1459.4780 3073.7661 3086.3795 3095.0187 3185.4441  
3197.8438 3199.0443 3207.2393 3209.1409 3215.8890

### S.27.2 Tripod ion pair in carbon tetrachloride

Cartesian coordinates (standard orientation)

|   |           |           |           |
|---|-----------|-----------|-----------|
| C | 0.667306  | -0.534714 | 1.521483  |
| H | -0.415539 | -0.473462 | 1.368565  |
| H | 1.004592  | -1.552634 | 1.711196  |
| H | 1.018756  | 0.128580  | 2.310460  |
| C | 0.682478  | 1.586664  | -0.298967 |



|    |           |           |           |
|----|-----------|-----------|-----------|
| H  | 1.043924  | 1.937836  | -1.264410 |
| H  | -0.401302 | 1.435311  | -0.283566 |
| H  | 1.020632  | 2.255843  | 0.490824  |
| C  | 0.676183  | -1.052757 | -1.222847 |
| H  | 1.021603  | -0.713233 | -2.197976 |
| H  | 1.023905  | -2.067483 | -1.037040 |
| H  | -0.407214 | -0.951840 | -1.102640 |
| S  | 1.477185  | -0.002104 | 0.002724  |
| Cl | -2.394125 | 0.002329  | -0.002177 |

SCF energy : -978.083334675

Gibbs free energy: -977.999749

#### Frequencies

|           |           |           |           |           |           |           |
|-----------|-----------|-----------|-----------|-----------|-----------|-----------|
| 127.5114  | 136.1349  | 153.2324  | 232.0990  | 251.0652  | 259.9466  | 277.6256  |
| 292.2768  | 327.8819  | 646.4483  | 718.4019  | 725.1557  | 909.6252  | 961.0566  |
| 966.0900  | 1057.7123 | 1062.9477 | 1077.8868 | 1320.6134 | 1323.3345 | 1362.5331 |
| 1420.2656 | 1421.3278 | 1443.7346 | 1446.7944 | 1458.4368 | 1462.7971 | 3014.0402 |
| 3020.5251 | 3033.6431 | 3164.3300 | 3165.0380 | 3166.1835 | 3195.8716 | 3200.2487 |
| 3202.9248 |           |           |           |           |           |           |

### S.27.3 Linear transition state in carbon tetrachloride

#### Cartesian coordinates (standard orientation)

|    |           |           |           |
|----|-----------|-----------|-----------|
| C  | -1.935191 | 1.387721  | 0.474167  |
| H  | -1.388239 | 1.331298  | 1.415552  |
| H  | -1.660652 | 2.295499  | -0.061071 |
| H  | -3.009284 | 1.380610  | 0.652615  |
| C  | -1.935225 | -1.387706 | 0.474174  |
| H  | -1.660633 | -2.295489 | -0.061027 |
| H  | -1.388330 | -1.331251 | 1.415590  |
| H  | -3.009329 | -1.380615 | 0.652560  |
| C  | 0.746673  | -0.000008 | -0.268179 |
| H  | 0.890201  | -0.927798 | -0.793462 |
| H  | 0.890211  | 0.927750  | -0.793513 |
| H  | 0.646295  | 0.000024  | 0.803169  |
| S  | -1.498319 | -0.000001 | -0.590763 |
| Cl | 3.082666  | -0.000003 | 0.125931  |

SCF energy : -978.047597572

Gibbs free energy: -977.968336

#### Frequencies

|           |          |          |          |          |          |          |
|-----------|----------|----------|----------|----------|----------|----------|
| -534.1296 | 62.0149  | 88.6476  | 99.2319  | 145.6955 | 187.5961 | 216.6082 |
| 262.5458  | 272.6534 | 295.6882 | 703.5568 | 753.8892 | 913.5730 | 940.7825 |

968.2141 1007.1852 1008.4107 1046.1873 1050.3566 1321.1722 1347.2026  
1356.4044 1365.0291 1433.7825 1438.3870 1449.0707 1454.7199 3071.5632  
3074.4134 3169.2525 3173.7364 3176.2658 3189.3553 3189.9600 3373.9488  
3376.8668

#### S.27.4 Immediate product cluster in carbon tetrachloride

Cartesian coordinates (standard orientation)

|    |           |           |           |
|----|-----------|-----------|-----------|
| C  | -1.834981 | 1.422651  | 0.503134  |
| H  | -0.967008 | 1.266699  | 1.146480  |
| H  | -1.669602 | 2.308206  | -0.109854 |
| H  | -2.727342 | 1.572925  | 1.111829  |
| C  | -2.325561 | -1.288569 | 0.577385  |
| H  | -2.473116 | -2.209112 | 0.013501  |
| H  | -1.456658 | -1.403997 | 1.227662  |
| H  | -3.215333 | -1.090472 | 1.176436  |
| C  | 1.623334  | -0.174332 | -0.341991 |
| H  | 1.562495  | -0.913411 | -1.135421 |
| H  | 1.268495  | 0.790892  | -0.691153 |
| H  | 1.057861  | -0.498399 | 0.527338  |
| S  | -2.058236 | 0.031380  | -0.628604 |
| Cl | 3.339720  | -0.004936 | 0.138805  |

SCF energy : -978.093773977

Gibbs free energy: -978.016086

Frequencies

41.5011 71.8137 74.8335 86.6665 105.3614 129.9722 181.7662  
195.8927 276.3205 705.9849 733.9719 759.2484 912.4722 953.2742  
987.1541 1028.8784 1038.1178 1059.8613 1321.4026 1345.0958 1365.2552  
1438.9388 1447.4470 1450.3301 1457.1449 1458.9047 1464.2088 3056.7730  
3059.8216 3100.7174 3139.4984 3147.4328 3169.2455 3173.1950 3210.3477  
3215.2721

#### S.27.5 CH<sub>3</sub>Cl in carbon tetrachloride

Cartesian coordinates (standard orientation)

|    |           |           |           |
|----|-----------|-----------|-----------|
| C  | 0.000000  | 0.000000  | -1.129954 |
| H  | 0.000000  | 1.032537  | -1.468311 |
| H  | 0.894203  | -0.516269 | -1.468311 |
| H  | -0.894203 | -0.516269 | -1.468311 |
| Cl | 0.000000  | 0.000000  | 0.657921  |

SCF energy : -500.111220414

Gibbs free energy: -500.096057

### Frequencies

734.3300 1030.6036 1030.9548 1360.9170 1458.1279 1458.4761 3096.8039  
3206.9181 3207.1032

### S.27.6 (CH<sub>3</sub>)<sub>2</sub>S in carbon tetrachloride

#### Cartesian coordinates (standard orientation)

|   |           |           |           |
|---|-----------|-----------|-----------|
| C | -1.378231 | 0.511689  | 0.000047  |
| H | -1.356291 | 1.136328  | -0.894489 |
| H | -2.294796 | -0.078136 | -0.000386 |
| H | -1.356396 | 1.136264  | 0.894464  |
| C | 1.378237  | 0.511687  | 0.000046  |
| H | 2.294799  | -0.078142 | -0.000477 |
| H | 1.356244  | 1.136387  | -0.894444 |
| H | 1.356444  | 1.136195  | 0.894512  |
| S | -0.000002 | -0.658072 | 0.000016  |

SCF energy : -477.980218605

Gibbs free energy: -477.931629

### Frequencies

189.1615 207.3089 274.1601 703.3630 753.3546 911.1624 946.3871  
983.9167 1039.2658 1315.1789 1339.4374 1436.7978 1447.5830 1450.9188  
1458.8348 3046.3364 3049.6133 3129.8718 3138.3565 3160.6845 3161.9194

### S.27.7 CH<sub>3</sub><sup>+</sup> in carbon tetrachloride

#### Cartesian coordinates (standard orientation)

|   |           |           |           |
|---|-----------|-----------|-----------|
| C | 0.000010  | 0.000052  | -0.000018 |
| H | -0.347437 | 1.030706  | 0.000036  |
| H | -0.719226 | -0.816310 | 0.000036  |
| H | 1.066605  | -0.214705 | 0.000036  |

SCF energy : -39.5192854934

Gibbs free energy: -39.507072

### Frequencies

1375.9585 1381.9957 1405.3956 3055.0122 3254.6286 3261.1183

## S.28 Selected cluster geometries in cyclohexane

### S.28.1 (CH<sub>3</sub>)<sub>3</sub>S<sup>+</sup> in cyclohexane

Used for the calculation of  $\Delta E_{\text{tri}}$

Cartesian coordinates (standard orientation)

|   |           |           |           |
|---|-----------|-----------|-----------|
| C | 1.273726  | -0.992151 | 0.268034  |
| H | 1.181969  | -0.927476 | 1.350392  |
| H | 1.142251  | -2.013645 | -0.083767 |
| H | 2.231773  | -0.605252 | -0.074609 |
| C | 0.224150  | 1.598429  | 0.266914  |
| H | -0.564483 | 2.251261  | -0.102736 |
| H | 0.175220  | 1.485476  | 1.348363  |
| H | 1.194743  | 1.973713  | -0.053003 |
| C | -1.498123 | -0.604194 | 0.267878  |
| H | -2.322201 | -0.006373 | -0.117192 |
| H | -1.622729 | -1.641676 | -0.036993 |
| H | -1.408969 | -0.512759 | 1.348313  |
| S | -0.000381 | -0.000985 | -0.524733 |

SCF energy : -517.652712158

Gibbs free energy: -517.565936

Frequencies

|           |           |           |           |           |           |           |
|-----------|-----------|-----------|-----------|-----------|-----------|-----------|
| 202.7920  | 209.7482  | 242.6308  | 278.7824  | 300.3911  | 307.6349  | 652.0551  |
| 729.6279  | 734.9433  | 905.1491  | 942.2428  | 943.8529  | 1045.5665 | 1056.2078 |
| 1063.2138 | 1329.9058 | 1333.4220 | 1368.6505 | 1422.5259 | 1429.6094 | 1433.7169 |
| 1440.5937 | 1443.8950 | 1462.2297 | 3083.8696 | 3087.8022 | 3089.9174 | 3198.4535 |
| 3201.5076 | 3202.1609 | 3205.2926 | 3208.4025 | 3209.6862 |           |           |

### S.28.2 (CH<sub>3</sub>)<sub>3</sub>S<sup>+</sup> in cyclohexane

Used for the calculation of  $\Delta G_{\text{tri}}$

Cartesian coordinates (input orientation)

|   |           |           |           |
|---|-----------|-----------|-----------|
| C | 0.004074  | 1.611271  | 0.263117  |
| H | 0.006492  | 1.494677  | 1.345051  |
| H | 0.895776  | 2.129011  | -0.085096 |
| H | -0.886391 | 2.134262  | -0.080870 |
| C | -1.401654 | -0.800692 | 0.274832  |
| H | -1.389057 | -1.846407 | -0.027309 |
| H | -1.316363 | -0.696750 | 1.354640  |
| H | -2.299786 | -0.314677 | -0.102362 |
| C | 1.396378  | -0.812754 | 0.258492  |
| H | 1.438191  | -1.825210 | -0.139112 |
| H | 2.285462  | -0.259667 | -0.039568 |
| H | 1.270457  | -0.810351 | 1.339469  |
| S | -0.003579 | -0.002713 | -0.527326 |

SCF energy : -517.652635587

Gibbs free energy: -517.567697

#### Frequencies

|           |           |           |           |           |           |           |
|-----------|-----------|-----------|-----------|-----------|-----------|-----------|
| 47.5709   | 164.5947  | 243.8716  | 281.2765  | 290.7311  | 336.1823  | 646.7618  |
| 730.4478  | 738.4414  | 902.9116  | 930.9535  | 944.3945  | 1021.4409 | 1042.7099 |
| 1061.2208 | 1320.5461 | 1332.2260 | 1347.4377 | 1418.0658 | 1428.8115 | 1432.4058 |
| 1436.7526 | 1448.9151 | 1457.8759 | 3073.7279 | 3085.9709 | 3094.1072 | 3185.4072 |
| 3197.3476 | 3198.5974 | 3206.2738 | 3208.6146 | 3214.9827 |           |           |

### S.28.3 Tripod ion pair in cyclohexane

#### Cartesian coordinates (standard orientation)

|    |           |           |           |
|----|-----------|-----------|-----------|
| C  | -0.664397 | -1.318450 | -0.929709 |
| H  | 0.418647  | -1.190353 | -0.829473 |
| H  | -1.017859 | -2.255633 | -0.502273 |
| H  | -1.003820 | -1.228089 | -1.960578 |
| C  | -0.667685 | 1.466226  | -0.674349 |
| H  | -1.021004 | 2.310231  | -0.083404 |
| H  | 0.415722  | 1.323683  | -0.600140 |
| H  | -1.008780 | 1.564352  | -1.703669 |
| C  | -0.676904 | -0.147476 | 1.605932  |
| H  | -1.032595 | 0.690020  | 2.203959  |
| H  | -1.021586 | -1.085949 | 2.037494  |
| H  | 0.407066  | -0.127356 | 1.454397  |
| S  | -1.470882 | -0.000595 | -0.004206 |
| Cl | 2.379544  | 0.000401  | 0.002338  |

SCF energy : -978.081387767

Gibbs free energy: -977.997845

#### Frequencies

|           |           |           |           |           |           |           |
|-----------|-----------|-----------|-----------|-----------|-----------|-----------|
| 127.3900  | 133.1445  | 154.8968  | 214.6393  | 254.4892  | 259.8233  | 280.6232  |
| 292.7784  | 333.0392  | 649.7710  | 720.7241  | 728.9598  | 914.1888  | 960.9888  |
| 966.0342  | 1062.9227 | 1064.2029 | 1078.0737 | 1321.9807 | 1325.4657 | 1366.7899 |
| 1418.5013 | 1422.6705 | 1442.2597 | 1449.0226 | 1459.3081 | 1464.6042 | 3008.1129 |
| 3014.5010 | 3028.2591 | 3159.8901 | 3160.8724 | 3164.2826 | 3194.2825 | 3198.7022 |
| 3199.7667 |           |           |           |           |           |           |

### S.28.4 Linear transition state in cyclohexane

#### Cartesian coordinates (standard orientation)

|   |          |           |           |
|---|----------|-----------|-----------|
| C | 1.930079 | -1.387490 | 0.475559  |
| H | 1.379830 | -1.330510 | 1.415005  |
| H | 1.656813 | -2.295360 | -0.060218 |
| H | 3.003620 | -1.380768 | 0.657306  |
| C | 1.929533 | 1.387722  | 0.475447  |
| H | 1.656036 | 2.295441  | -0.060459 |

|    |           |           |           |
|----|-----------|-----------|-----------|
| H  | 1.379180  | 1.330675  | 1.414834  |
| H  | 3.003051  | 1.381371  | 0.657348  |
| C  | -0.736986 | -0.000151 | -0.272085 |
| H  | -0.887714 | 0.926635  | -0.797369 |
| H  | -0.887474 | -0.928043 | -0.795492 |
| H  | -0.644054 | 0.000939  | 0.800059  |
| S  | 1.496575  | -0.000009 | -0.590861 |
| Cl | -3.078838 | -0.000043 | 0.126426  |

SCF energy : -978.046166990

Gibbs free energy: -977.966706

#### Frequencies

|           |           |           |           |           |           |           |
|-----------|-----------|-----------|-----------|-----------|-----------|-----------|
| -522.9243 | 67.5641   | 92.6761   | 100.2669  | 151.0072  | 188.5124  | 215.5207  |
| 264.3247  | 273.1236  | 295.9678  | 703.5823  | 753.9406  | 913.4306  | 941.1821  |
| 968.4508  | 1008.1560 | 1010.5695 | 1046.3148 | 1052.9255 | 1321.6454 | 1347.3629 |
| 1356.4420 | 1365.2515 | 1434.1897 | 1439.1904 | 1449.0990 | 1455.0498 | 3072.1907 |
| 3074.6383 | 3168.6867 | 3174.4269 | 3176.6135 | 3189.5609 | 3190.0663 | 3372.5709 |
| 3375.4378 |           |           |           |           |           |           |

### S.28.5 Immediate product cluster in cyclohexane

#### Cartesian coordinates (standard orientation)

|    |           |           |           |
|----|-----------|-----------|-----------|
| C  | -1.851160 | 1.421267  | 0.505003  |
| H  | -0.987011 | 1.272017  | 1.155080  |
| H  | -1.688134 | 2.308552  | -0.106108 |
| H  | -2.749367 | 1.564291  | 1.106879  |
| C  | -2.318700 | -1.293725 | 0.573879  |
| H  | -2.455405 | -2.214958 | 0.008375  |
| H  | -1.453077 | -1.403096 | 1.229666  |
| H  | -3.213838 | -1.103468 | 1.167476  |
| C  | 1.622933  | -0.161418 | -0.336674 |
| H  | 1.551891  | -0.901008 | -1.128824 |
| H  | 1.274829  | 0.806211  | -0.686054 |
| H  | 1.057696  | -0.479348 | 0.535135  |
| S  | -2.054424 | 0.029150  | -0.629412 |
| Cl | 3.342045  | -0.006608 | 0.137396  |

SCF energy : -978.093514755

Gibbs free energy: -978.015798

#### Frequencies

|          |           |           |           |           |           |           |
|----------|-----------|-----------|-----------|-----------|-----------|-----------|
| 46.2920  | 67.7716   | 72.7917   | 84.5724   | 106.5630  | 132.1065  | 182.1476  |
| 195.9954 | 276.0121  | 706.3860  | 735.5728  | 759.3992  | 912.2389  | 953.2381  |
| 987.1694 | 1026.8195 | 1038.1436 | 1059.8077 | 1321.6491 | 1345.2952 | 1364.7259 |

1439.3458 1447.8163 1450.6196 1457.7292 1459.1894 1464.9422 3057.2156  
3060.1462 3099.8089 3139.7582 3147.6095 3169.3425 3173.1467 3209.0002  
3214.8897

### S.28.6 CH<sub>3</sub>Cl in cyclohexane

Cartesian coordinates (standard orientation)

|    |           |           |           |
|----|-----------|-----------|-----------|
| C  | 0.000000  | 0.000000  | -1.129591 |
| H  | 0.000000  | 1.032464  | -1.468297 |
| H  | 0.894140  | -0.516232 | -1.468297 |
| H  | -0.894140 | -0.516232 | -1.468297 |
| Cl | 0.000000  | 0.000000  | 0.657790  |

SCF energy : -500.111076976

Gibbs free energy: -500.095911

Frequencies

735.3703 1030.6385 1030.9668 1361.2074 1458.7501 1459.0852 3096.4774  
3206.3265 3206.5007

### S.28.7 (CH<sub>3</sub>)<sub>2</sub>S in cyclohexane

Cartesian coordinates (standard orientation)

|   |           |           |           |
|---|-----------|-----------|-----------|
| C | 1.377969  | 0.511760  | -0.000047 |
| H | 1.356270  | 1.136404  | 0.894538  |
| H | 2.294597  | -0.077990 | 0.000336  |
| H | 1.356330  | 1.136426  | -0.894453 |
| C | -1.377974 | 0.511758  | -0.000047 |
| H | -2.294599 | -0.077996 | 0.000426  |
| H | -1.356223 | 1.136462  | 0.894494  |
| H | -1.356377 | 1.136357  | -0.894500 |
| S | 0.000002  | -0.658173 | -0.000017 |

SCF energy : -477.980057050

Gibbs free energy: -477.931470

Frequencies

189.4200 206.5377 273.8069 703.6889 753.6314 911.0333 946.2934  
983.8545 1039.2239 1315.3527 1339.5285 1437.2281 1447.9348 1451.3951  
1459.4136 3046.0566 3049.3579 3129.3640 3137.9132 3160.4966 3161.7153

### S.28.8 CH<sub>3</sub><sup>+</sup> in cyclohexane

Cartesian coordinates (standard orientation)

|   |           |          |           |
|---|-----------|----------|-----------|
| C | 0.000005  | 0.000056 | -0.000016 |
| H | -0.393480 | 1.014290 | 0.000032  |

|   |           |           |          |
|---|-----------|-----------|----------|
| H | -0.681958 | -0.847997 | 0.000032 |
| H | 1.075405  | -0.166630 | 0.000032 |

SCF energy : -39.5137765504

Gibbs free energy: -39.501495

Frequencies

1378.5491 1390.3007 1415.3333 3058.6963 3258.6339 3262.5526

## S.29 Selected cluster geometries in the vacuum

### S.29.1 $(\text{CH}_3)_3\text{S}^+$ in the vacuum

Cartesian coordinates (standard orientation)

|   |           |           |           |
|---|-----------|-----------|-----------|
| C | -1.617646 | -0.095333 | 0.265991  |
| H | -1.513334 | -0.088220 | 1.349252  |
| H | -2.190700 | 0.761501  | -0.086492 |
| H | -2.085707 | -1.014199 | -0.084997 |
| C | 0.891851  | -1.352538 | 0.265800  |
| H | 1.920932  | -1.298663 | -0.087457 |
| H | 0.835509  | -1.264203 | 1.349028  |
| H | 0.435673  | -2.277549 | -0.084760 |
| C | 0.726420  | 1.448063  | 0.265575  |
| H | 1.755138  | 1.515087  | -0.086452 |
| H | 0.165588  | 2.313304  | -0.085990 |
| H | 0.679931  | 1.354816  | 1.348964  |
| S | -0.000424 | -0.000189 | -0.519706 |

SCF energy : -517.609832488

Gibbs free energy: -517.523689

Frequencies

178.7937 214.7626 225.2531 267.8453 269.5203 302.8690 644.5839  
724.9535 731.7595 896.2527 938.8708 940.5336 1045.6222 1047.2230  
1052.0250 1329.3526 1330.4778 1364.7509 1419.6450 1430.0061 1431.7214  
1441.0472 1442.0313 1453.5419 3082.2539 3083.8207 3084.7587 3192.8049  
3193.5858 3195.8161 3202.1154 3202.5908 3206.9428

### S.29.2 Tripod ion pair in the vacuum

Cartesian coordinates (standard orientation)

|   |           |           |           |
|---|-----------|-----------|-----------|
| C | -0.630032 | -0.266245 | 1.591704  |
| H | 0.456710  | -0.244644 | 1.418645  |
| H | -0.970990 | 0.532695  | 2.249344  |
| H | -0.982434 | -1.229159 | 1.959972  |
| C | -0.638980 | -1.249217 | -1.024270 |



|    |           |           |           |
|----|-----------|-----------|-----------|
| H  | -0.985462 | -1.082247 | -2.043676 |
| H  | 0.448292  | -1.121723 | -0.915064 |
| H  | -0.991789 | -2.214913 | -0.663522 |
| C  | -0.634818 | 1.513359  | -0.566137 |
| H  | -1.004304 | 1.702863  | -1.573341 |
| H  | -0.960385 | 2.306630  | 0.105767  |
| H  | 0.451818  | 1.344906  | -0.526888 |
| S  | -1.438757 | 0.001583  | 0.001061  |
| Cl | 2.293038  | -0.000418 | -0.002117 |

SCF energy : -978.065762847

Gibbs free energy: -977.982589

#### Frequencies

|           |           |           |           |           |           |           |
|-----------|-----------|-----------|-----------|-----------|-----------|-----------|
| 145.2761  | 147.5332  | 176.4406  | 231.4111  | 251.9752  | 254.0619  | 279.1165  |
| 282.4587  | 336.4008  | 643.1004  | 711.6425  | 717.0560  | 912.1020  | 961.1332  |
| 962.8537  | 1059.6224 | 1062.1894 | 1079.4496 | 1311.5967 | 1313.2325 | 1360.8242 |
| 1415.2347 | 1416.2023 | 1442.6309 | 1446.8425 | 1464.4587 | 1466.4376 | 2938.6866 |
| 2939.9742 | 2972.5719 | 3139.7434 | 3142.5732 | 3147.1599 | 3188.8846 | 3190.8816 |
| 3194.1087 |           |           |           |           |           |           |

### S.29.3 Linear transition state in the vacuum

#### Cartesian coordinates (standard orientation)

|    |           |           |           |
|----|-----------|-----------|-----------|
| C  | 1.888747  | -1.387977 | 0.484371  |
| H  | 1.326329  | -1.321889 | 1.415946  |
| H  | 1.610394  | -2.294079 | -0.052148 |
| H  | 2.960763  | -1.391198 | 0.674788  |
| C  | 1.888553  | 1.388068  | 0.484336  |
| H  | 1.610115  | 2.294123  | -0.052217 |
| H  | 1.326137  | 1.321921  | 1.415907  |
| H  | 2.960567  | 1.391357  | 0.674758  |
| C  | -0.628311 | -0.000058 | -0.310298 |
| H  | -0.860462 | 0.919602  | -0.823327 |
| H  | -0.860499 | -0.919645 | -0.823460 |
| H  | -0.639501 | -0.000136 | 0.768066  |
| S  | 1.473389  | 0.000000  | -0.586576 |
| Cl | -3.053059 | -0.000015 | 0.131556  |

SCF energy : -978.032095350

Gibbs free energy: -977.951994

#### Frequencies

|           |          |          |          |          |          |          |
|-----------|----------|----------|----------|----------|----------|----------|
| -371.4734 | 82.3593  | 104.1301 | 119.8242 | 179.6005 | 187.3538 | 220.7991 |
| 268.8208  | 276.6326 | 305.8919 | 702.3696 | 754.0790 | 907.9140 | 940.1474 |

|           |           |           |           |           |           |           |
|-----------|-----------|-----------|-----------|-----------|-----------|-----------|
| 940.9431  | 997.0984  | 1002.0962 | 1046.8522 | 1069.0162 | 1324.3546 | 1348.3601 |
| 1357.3810 | 1369.5803 | 1439.3387 | 1443.8404 | 1452.0707 | 1455.9128 | 3075.5818 |
| 3077.5696 | 3162.5055 | 3179.1608 | 3180.9033 | 3190.8200 | 3192.4648 | 3349.5616 |
| 3351.6936 |           |           |           |           |           |           |

### S.30 Immediate product cluster in vacuum

Cartesian coordinates (standard orientation)

|    |           |           |           |
|----|-----------|-----------|-----------|
| C  | -1.888801 | 1.414848  | 0.511161  |
| H  | -1.034119 | 1.282615  | 1.177659  |
| H  | -1.732318 | 2.307600  | -0.093826 |
| H  | -2.800967 | 1.539750  | 1.096391  |
| C  | -2.299919 | -1.306435 | 0.563009  |
| H  | -2.409835 | -2.228332 | -0.007424 |
| H  | -1.443577 | -1.403671 | 1.233299  |
| H  | -3.208557 | -1.137421 | 1.142745  |
| C  | 1.619736  | -0.122331 | -0.316911 |
| H  | 1.512280  | -0.861829 | -1.105479 |
| H  | 1.289450  | 0.852245  | -0.665455 |
| H  | 1.055898  | -0.421802 | 0.562785  |
| S  | -2.042471 | 0.024138  | -0.632320 |
| Cl | 3.345010  | -0.013638 | 0.131346  |

SCF energy : -978.091310779

Gibbs free energy: -978.013517

Frequencies

|           |           |           |           |           |           |           |
|-----------|-----------|-----------|-----------|-----------|-----------|-----------|
| 47.9916   | 61.1846   | 69.9953   | 86.8684   | 113.4812  | 135.8738  | 187.4475  |
| 192.5189  | 275.2044  | 709.3608  | 748.7990  | 761.6384  | 911.1200  | 953.6050  |
| 988.4857  | 1023.1867 | 1038.6416 | 1059.2567 | 1323.9211 | 1347.8276 | 1366.9492 |
| 1442.5761 | 1451.4349 | 1453.2472 | 1462.6174 | 1463.4079 | 1470.9755 | 3056.6990 |
| 3059.9875 | 3095.1204 | 3138.4132 | 3146.4675 | 3168.5596 | 3170.6927 | 3201.0647 |
| 3209.8466 |           |           |           |           |           |           |

#### S.30.1 Methylchloride in the vacuum

Cartesian coordinates (standard orientation)

|    |           |           |           |
|----|-----------|-----------|-----------|
| C  | 0.000000  | 0.000000  | -1.126543 |
| H  | 0.000000  | 1.031868  | -1.468159 |
| H  | 0.893624  | -0.515934 | -1.468159 |
| H  | -0.893624 | -0.515934 | -1.468159 |
| Cl | 0.000000  | 0.000000  | 0.656690  |

SCF energy : -500.109839629

Gibbs free energy: -500.094649

Frequencies

744.4957 1030.7046 1030.9762 1363.3907 1463.7530 1463.8861 3093.8937  
3201.3933 3201.4456

**S.30.2 (CH<sub>3</sub>)<sub>2</sub>S in the vacuum**

Cartesian coordinates (standard orientation)

|   |           |           |           |
|---|-----------|-----------|-----------|
| C | 1.375880  | 0.512311  | -0.000050 |
| H | 1.356252  | 1.137032  | 0.894913  |
| H | 2.292981  | -0.076891 | -0.000135 |
| H | 1.355895  | 1.137860  | -0.894262 |
| C | -1.375885 | 0.512310  | -0.000050 |
| H | -2.292983 | -0.076896 | -0.000054 |
| H | -1.356210 | 1.137084  | 0.894873  |
| H | -1.355938 | 1.137798  | -0.894304 |
| S | 0.000002  | -0.658982 | -0.000027 |

SCF energy : -477.978724695

Gibbs free energy: -477.930186

Frequencies

191.4353 197.4953 269.2910 706.2454 755.8298 909.9838 945.4155  
982.5403 1038.4312 1316.7320 1339.8384 1440.6520 1450.3690 1455.4296  
1463.9731 3043.7518 3047.2255 3125.1696 3134.2169 3158.8552 3159.9513

**S.30.3 CH<sub>3</sub><sup>+</sup> in the vacuum**

Cartesian coordinates (standard orientation)

|   |           |           |           |
|---|-----------|-----------|-----------|
| C | -0.000078 | -0.000049 | -0.000048 |
| H | -1.036955 | -0.338350 | 0.000097  |
| H | 0.225544  | 1.067297  | 0.000096  |
| H | 0.811877  | -0.728652 | 0.000096  |

SCF energy : -39.4545672620

Gibbs free energy: -39.442577

Frequencies

1383.7672 1388.8747 1402.0350 3021.5144 3216.9450 3225.9531
